# Supplementary material for: Ce(SO4)2-catalysed the highly diastereoselective synthesis of tetrahydroquinolines via an imino Diels Alder ABB′ type reaction and their in vivo toxicity and imaging in zebrafish embryos
Source: Royal Society of Chemistry journal article supplement (doi:10.1039/c6ra04325a), 2016-01-01
Supplement: c6ra04325a1.pdf [file c6ra04325a1.pdf]

# Ce(SO<sub>4</sub>)<sub>2</sub>-Catalysed the Highly Diastereoselective Synthesis of Tetrahydroquinolines Via imino Diels Alder ABB' Type Reaction and their In Vivo Toxicity and Imaging in Zebrafish Embryos

Carlos A. Martínez Bonilla, Carlos E. Puerto Galvis, Leonor Y. Vargas Méndez and Vladimir V. Kouznetsov\*

*Laboratorio de Química Orgánica y Biomolecular, Universidad Industrial de Santander, Parque Tecnológico Guatiguara, Km 2 via refugio, Piedecuesta, A.A. 681011, Colombia.*

*\* kouznet@uis.edu.co; vkuznechnik@gmail.com.*

## ELECTRONIC SUPPORTING INFORMATION

| List of contents                                                                                                                                         | Pages  |
|----------------------------------------------------------------------------------------------------------------------------------------------------------|--------|
| 1. Reagents.                                                                                                                                             | ESI-2  |
| 2. Characterization data of all synthesized 2-methyltetrahydroquinolines <b>3a-l</b> .                                                                   | ESI-2  |
| 3. Copies of <sup>1</sup> H NMR, <sup>13</sup> C NMR, DEPT-135, COSY, HSQC and HMBC charts of the synthesized 2-methyltetrahydroquinolines <b>3a-l</b> . | ESI-10 |
| 4. Photographic records of the phenotypic changes during the development of the zebrafish embryos treated with compounds <b>3a-l</b> after 96 hpf.       | ESI-42 |

## 1. Reagents

**Aniline:** Was purchased from Merck and used as received.

**4'-Aminoacetanilide:** Was purchased from Merck and used as received.

**p-Anisidine:** Was purchased from Aldrich and used as received.

**4-Aminobenzoic acid:** Was purchased from Aldrich and used as received.

**N-Vinylacetamide:** Was purchased from Aldrich and used as received.

**N-Vinylformamide:** Was purchased from Aldrich and used as received.

**1-Vinyl-2-pyrrolidone:** Was purchased from Merck and used as received.

**Ceric ammonium nitrate:** Was purchased from Merck and used as received.

**Cerium(IV) sulfate:** Was purchased from Merck and used as received.

**Methanol:** Was purchased from Merck and used as received.

**Acetonitrile:** Was purchased from J.T.Baker and used as received.

**Dimethyl sulfoxide:** Was purchased from Aldrich and used as received.

**Silica gel 60 (0.063-0.200 mm) 70-230 mesh:** Was purchased from Merck and used as received.

## 2. Characterization data of all synthesized 2-methyltetrahydroquinolines 3a-l

**cis-4-Acetamido-6-acetyl-2-methyl-1,2,3,4-tetrahydroquinoline (3a):** White solid (0.43 g, 1.78 mmol, 89 %),  $R_f$  [hexane-EtOAc] = 0.5; mp: 225-228 °C; FT-IR (KBr disk, cm<sup>-1</sup>): 3363, 3239, 3070, 1635, 1589, 1434, 1280, 817; <sup>1</sup>H NMR (400 MHz, DMSO-d<sub>6</sub>), δ(ppm): 8.18 (d,  $J$  = 8.8 Hz, 1H, 4-NH), 7.55 (d,  $J$  = 8.3 Hz, 1H, 7-H<sub>Ar</sub>), 7.52 (s, 1H, 5-H<sub>Ar</sub>), 6.73 (s, 1H, 1-NH), 6.48 (d,  $J$  = 8.3 Hz, 1H, 8-H<sub>Ar</sub>), 5.02 (ddd,  $J$  = 11.5, 8.8, 5.4 Hz, 1H, 4-H<sub>ax</sub>), 3.55 (dq,  $J$  = 11.5, 6.3, 2.6 Hz, 1H, 2-H<sub>ax</sub>), 2.35 (s, 3H, 6-COCH<sub>3</sub>), 2.02-1.96 (m, 1H, 3-H<sub>eq</sub>), 1.94 (s, 3H, 4-COCH<sub>3</sub>), 1.38 (q,  $J$  = 11.5 Hz, 1H, 3-H<sub>ax</sub>), 1.17 (d,  $J$  = 6.3 Hz, 3H, 2-CH<sub>3</sub>); <sup>13</sup>C NMR (101 MHz, DMSO-d<sub>6</sub>), δ(ppm): 194.9, 169.4, 149.9, 129.3 (+), 127.2 (+), 124.4, 120.2, 112.0 (+), 45.9 (+), 44.9 (+), 36.6 (-), 25.8 (+), 22.8 (+), 21.5 (+); COSY correlation [ $\delta_H/\delta_H$ ]: 1.17/3.55 [2-CH<sub>3</sub>/2-H<sub>ax</sub>], 1.38/5.02/2.02-1.96 [3-H<sub>ax</sub>/4-H<sub>ax</sub>/3-H<sub>eq</sub>], 2.02-1.96/5.02/1.38 [3-H<sub>eq</sub>/4-H<sub>ax</sub>/3-H<sub>ax</sub>], 3.55/2.02-1.96/1.38/1.17 [2-H<sub>ax</sub>/3-H<sub>eq</sub>/3-H<sub>ax</sub>/2-CH<sub>3</sub>], 5.02/2.02-1.96/1.38 [4-H<sub>ax</sub>/3-H<sub>eq</sub>/3-H<sub>ax</sub>], 6.48/7.55 [8-H<sub>Ar</sub>/7-H<sub>Ar</sub>], 7.55/6.48 [7-H<sub>Ar</sub>/8-H<sub>Ar</sub>], 8.18/5.02 [4-NH/4-H<sub>ax</sub>]; HSQC correlation [ $\delta_H/\delta_C$ ]: 1.17/21.5 [2-CH<sub>3</sub>/C-11], 1.38/36.6 [3-H<sub>ax</sub>/C-3], 1.94/22.8 [4-COCH<sub>3</sub>/C-14], 2.02-1.96/36.6 [3-H<sub>eq</sub>/C-3], 2.35/25.8 [6-COCH<sub>3</sub>/C-16], 3.55/46.0 [2-H<sub>ax</sub>/C-2], 5.02/44.9 [4-H<sub>ax</sub>/C-4], 6.48/112.0 [8-H<sub>Ar</sub>/C-8], 7.52/127.2 [5-H<sub>Ar</sub>/C-5], 7.55/129.3 [7-H<sub>Ar</sub>/C-7]; HMBC correlation [ $\delta_H/\delta_C$ ]: 1.17/46.0/36.6 [2-CH<sub>3</sub>/C-2/C-3], 1.38/46.0/44.9/21.5 [3-H<sub>ax</sub>/C-2/C-4/C-11], 1.94/169.4 [4-COCH<sub>3</sub>/C-13], 2.02-1.96/44.9 [3-H<sub>eq</sub>/C-4], 2.35/194.7/124.4 [6-COCH<sub>3</sub>/C-12/C-6], 5.02/36.6/120.2 [4-H<sub>ax</sub>/C-3/C-9], 6.48/124.4/120.2/44.9 [8-H<sub>Ar</sub>/C-6/C-9/C-4], 6.73/149.9/120.2/112.0/46.0/36.6/21.5 [1-NH/C-10/C-9/C-8/C-2/C-3/C-11], 7.52/194.7/149.9/129.3/44.9 [5-H<sub>Ar</sub>/C-12/C-10/C-7/C-4], 7.55/194.7/149.9/127.2 [7-H<sub>Ar</sub>/C-12/C-10/C-5], 8.18/169.4/44.9 [4-NH/C-13/C-4]; GC:  $R_t$  = 24.3 min, MS (EI),  $m/z$  (%): 246 (M<sup>+</sup>, 5),

231 (5), 215 (2), 203 (12), 186 (80), 172 (100), 77 (3); HRMS (ESI+):  $m/z$ : calcd for C<sub>14</sub>H<sub>19</sub>N<sub>2</sub>O<sub>2</sub> ([M+H]<sup>+</sup>) 247,1441, found: 247,1437; calcd for C<sub>14</sub>H<sub>18</sub>N<sub>2</sub>NaO<sub>2</sub> ([M+Na]<sup>+</sup>) 269,1260, found: 269,1263.

**cis-4-Acetamido-2-methyl-1,2,3,4-tetrahydroquinoline (3b):** White solid (0.33 g, 1.6 mmol, 80 %),  $R_f$  [hexane-EtOAc 1:1] = 0.7; mp: 170-172 °C; FT-IR (KBr disk, cm<sup>-1</sup>): 3347, 3255, 3070, 2962, 1635, 1496, 1311, 971, 755; <sup>1</sup>H NMR (400 MHz, CDCl<sub>3</sub>),  $\delta$ (ppm): 8.12 (d,  $J$  = 8.9 Hz, 1H, 4-NH), 6.92-6.86 (m, 2H, 8-H<sub>Ar</sub>), 6.49-6.44 (m, 2H, 7-H<sub>Ar</sub> and 5-H<sub>Ar</sub>), 5.66 (s, 1H, 1-NH), 5.02 (ddd,  $J$  = 11.8, 8.9, 6.0 Hz, 1H, 4-H<sub>ax</sub>), 3.44-3.38 (m, 1H, 2-H<sub>ax</sub>), 1.95-1.89 (m, 1H, 2-H<sub>ax</sub>), 1.88 (s, 3H, 4-COCH<sub>3</sub>), 1.38 (q,  $J$  = 11.8 Hz, 1H, 3-H<sub>ax</sub>), 1.12 (d,  $J$  = 6.2 Hz, 3H, 2-CH<sub>3</sub>); <sup>13</sup>C NMR (101 MHz, CDCl<sub>3</sub>),  $\delta$ (ppm): 169.2, 145.7, 127.4 (+), 126.6 (+), 121.3, 115.5 (+), 113.4 (+), 46.1 (+), 45.2 (+), 37.5 (-), 22.8 (+), 22.0 (+); COSY correlation [ $\delta_H/\delta_H$ ]: 1.12/3.44-3.38 [2-CH<sub>3</sub>/2-H<sub>ax</sub>], 1.38/5.02/3.44-3.38/1.95-1.89 [3-H<sub>ax</sub>/4-H<sub>ax</sub>/2-H<sub>ax</sub>/3-H<sub>eq</sub>], 1.95-1.89/5.02/3.44-3.38/1.38 [3-H<sub>eq</sub>/4-H<sub>ax</sub>/2-H<sub>ax</sub>/3-H<sub>ax</sub>], 3.44-3.38/1.95-1.89/1.38/1.12 [2-H<sub>ax</sub>/3-H<sub>eq</sub>/3-H<sub>ax</sub>/2-CH<sub>3</sub>], 5.02/8.12/1.95/1.38-1.89 [4-H<sub>ax</sub>/4-NH/3-H<sub>ax</sub>/3-H<sub>eq</sub>], 8.12/5.02 [4-NH/4-H<sub>ax</sub>]; HSQC correlation [ $\delta_H/\delta_C$ ]: 1.12/22.0 [2-CH<sub>3</sub>/C-11], 1.38/37.5 [3-H<sub>ax</sub>/C-3], 1.88/22.8 [4-COCH<sub>3</sub>/C-14], 1.95-1.89/37.5 [3-H<sub>eq</sub>/C-3], 3.44-3.38/46.1 [2-H<sub>ax</sub>/C-2], 5.02/45.7 [4-H<sub>ax</sub>/C-4], 6.49-6.44/113.4,115.5 [7-H<sub>Ar</sub>,5-H<sub>Ar</sub>/C-5,C-7], 6.92-6.86/127.4,126.7 [6-H<sub>Ar</sub>,8-H<sub>Ar</sub>/C-8,C-6]; HMBC correlation [ $\delta_H/\delta_C$ ]: 1.12/46.1/37.5 [2-CH<sub>3</sub>/C-2/C-3], 1.38/46.1/45.2/22.0 [3-H<sub>ax</sub>/C-2/C-4/C-11], 1.88/169.2 [4-COCH<sub>3</sub>/C-13], 1.95-1.89/121.4/45.2 [3-H<sub>eq</sub>/C-9/C-4], 5.66/121.4/113.4/37.5 [1-NH/C-9/C-8/C-3], 6.49-6.44/121.4/115.5,113.4 [7-H<sub>Ar</sub>,5-H<sub>Ar</sub>/C-9/C-6,C-8], 6.92-6.86/127.4,126.6/145.8/45.2 [6-H<sub>Ar</sub>,8-H<sub>Ar</sub>/C-7,C-5/C-10/C-4], 8.12/169.2 [4-NH/C-13]; GC:  $R_t$  = 16.7 min, MS (EI),  $m/z$  (%): 204 (M<sup>+</sup>, 25), 187 (2), 173 (2), 161 (5), 114 (60), 130 (100), 77 (5); HRMS (ESI+):  $m/z$ : calcd for C<sub>12</sub>H<sub>17</sub>N<sub>2</sub>O ([M+H]<sup>+</sup>) 205,1335, found: 205,1339; calcd for C<sub>12</sub>H<sub>16</sub>N<sub>2</sub>NaO ([M+Na]<sup>+</sup>) 227,1155, found: 227,1152.

**cis-4-Acetamido-6-methoxy-2-methyl-1,2,3,4-tetrahydroquinoline (3c):** White solid (0.36 g, 1.54 mmol, 77 %),  $R_f$  [hexane-EtOAc 1:1] = 0.7; mp: 176-178 °C; FT-IR (KBr disk, cm<sup>-1</sup>): 3378, 3286, 2962, 1727, 1635, 1542, 1295, 1234, 1157, 1033, 817; <sup>1</sup>H NMR (400 MHz, DMSO-d<sub>6</sub>),  $\delta$ (ppm): 8.15 (d, 1H,  $J$  = 8.7 Hz, 4-NH), 6.58 (d, 1H,  $J$  = 8.5 Hz, 7-H<sub>Ar</sub>), 6.51 (s, 1H, 5-H<sub>Ar</sub>), 6.43 (d, 1H,  $J$  = 8.5 Hz, 8-H<sub>Ar</sub>), 5.28 (s, 1H, 1-NH), 5.05-4.98 (m, 1H, 4-H<sub>ax</sub>), 3.60 (s, 3H, 6-OCH<sub>3</sub>), 3.30-3.37 (m, 1H, 2-H<sub>ax</sub>), 1.96-1.90 (m, 1H, 3-H<sub>eq</sub>), 1.89 (s, 3H, 4-COCH<sub>3</sub>), 1.36 (q, 1H,  $J$  = 11.7 Hz, 3-H<sub>ax</sub>), 1.10 (d, 3H,  $J$  = 6.0 Hz, 2-CH<sub>3</sub>); <sup>13</sup>C NMR (101 MHz, DMSO-d<sub>6</sub>),  $\delta$ (ppm): 169.3, 150.7, 140.1, 122.7, 114.6 (+), 113.6 (+), 112.4 (+), 55.4 (+), 46.4 (+), 45.4 (+), 37.7 (-), 22.8 (+), 22.0 (+); GC:  $R_t$  = 20.7 min, MS (EI),  $m/z$  (%): 234 (M<sup>+</sup>, 25), 234 (25), 219 (2), 203 (2), 174 (55), 160 (100); HRMS (ESI+):  $m/z$ : calcd for C<sub>13</sub>H<sub>19</sub>N<sub>2</sub>O<sub>2</sub> ([M+H]<sup>+</sup>) 235,1441, found: 235,1439; calcd for C<sub>13</sub>H<sub>18</sub>N<sub>2</sub>NaO<sub>2</sub> ([M+Na]<sup>+</sup>) 257,1260, found: 257,1261.

**cis-4-Acetamido-6-carboxy-2-methyl-1,2,3,4-tetrahydroquinoline (3d):** White solid (0.37 g, 1.5 mmol, 75 %),  $R_f$  [hexane-EtOAc 1:2] = 0.4; mp: 259-262 °C; FT-IR (KBr disk,  $\text{cm}^{-1}$ ): 3363, 3301, 3270, 2962, 2591, 1666, 1604, 1511, 1295, 833, 771; <sup>1</sup>H NMR (400 MHz, DMSO-*d*<sub>6</sub>),  $\delta$ (ppm): 11.9 (br., s, 1H, 6-COOH), 8.21 (d,  $J$  = 9.0 Hz, 1H, 4-NH), 7.52 (s, 1H, 5-H<sub>Ar</sub>), 7.50-7.52 (m, 1H, 7-H<sub>Ar</sub>), 6.54 (s, 1H, 1-NH), 6.47 (d,  $J$  = 9.0 Hz, 1H, 8-H<sub>Ar</sub>), 5.01 (dd,  $J$  = 11.8, 9.0 Hz, 1H, 4-H<sub>ax</sub>), 3.53 (dq,  $J$  = 11.8, 6.3, 2.5 Hz, 1H, 2-H<sub>ax</sub>), 1.95-1.98 (m, 1H, 3-H<sub>eq</sub>), 1.93 (s, 3H, 4-COCH<sub>3</sub>), 1.38 (q,  $J$  = 11.8 Hz, 1H, 3-H<sub>ax</sub>), 1.16 (d,  $J$  = 6.3 Hz, 3H, 2-CH<sub>3</sub>); <sup>13</sup>C NMR (101 MHz, DMSO-*d*<sub>6</sub>),  $\delta$ (ppm): 169.5, 167.7, 149.6, 129.7 (+), 128.5 (+), 120.3, 116.5, 112.3 (+), 46.0 (+), 45.0 (+), 36.8 (-), 22.9 (+), 21.6 (+); COSY correlation [ $\delta_H/\delta_H$ ]: 1.16/3.53 [2-CH<sub>3</sub>/2-H<sub>ax</sub>], 1.38/5.01/3.53/1.95-1.98 [3-H<sub>ax</sub>/4-H<sub>ax</sub>/2-H<sub>ax</sub>/3-H<sub>eq</sub>], 1.95-1.98/5.01/3.53/1.38 [3-H<sub>eq</sub>/4-H<sub>ax</sub>/2-H<sub>ax</sub>/3-H<sub>ax</sub>], 3.53/1.95-1.98/1.38/1.16 [2-H<sub>ax</sub>/3-H<sub>eq</sub>/3-H<sub>ax</sub>/2-CH<sub>3</sub>], 5.01/8.21/1.95-1.98/1.38 [4-H<sub>ax</sub>/4-NH/3-H<sub>eq</sub>/3-H<sub>ax</sub>], 6.47/7.50-7.52 [8-H<sub>Ar</sub>/7-H<sub>Ar</sub>], 6.54/1.95-1.98 [1-NH/3-H<sub>eq</sub>], 7.50-7.52/6.47 [7-H<sub>Ar</sub>/8-H<sub>Ar</sub>], 7.52/5.01 [5-H<sub>Ar</sub>/4-H<sub>ax</sub>], 8.21/5.01 [4-NH/4-H<sub>ax</sub>]; HSQC correlation [ $\delta_H/\delta_C$ ]: 1.16/21.6 [2-CH<sub>3</sub>/C-11], 1.93/22.7 [4-COCH<sub>3</sub>/C-14], 1.95-1.98/1.4 [3-H<sub>eq</sub>/3-H<sub>ax</sub>/C-3], 3.53/46.0 [2-H<sub>ax</sub>/C-2], 5.01/45.0 [4-H<sub>ax</sub>/C-4], 6.47/112.3 [8-H<sub>Ar</sub>/C-8], 7.50-7.52/129.7 [7-H<sub>Ar</sub>/C-7], 7.52/128.5 [5-H<sub>Ar</sub>/C-5]; HMBC correlation [ $\delta_H/\delta_C$ ]: 1.16/46.0/36.8 [2-CH<sub>3</sub>/C-2/C-3], 1.38/46.0/45.0/21.6 [3-H<sub>ax</sub>/C-2/C-4/C-11], 1.93/169.5 [4-COCH<sub>3</sub>/C-13], 1.95-1.98/45.0 [3-H<sub>eq</sub>/C-4], 5.01/169.5/120.3/36.8 [4-H<sub>ax</sub>/C-13/C-10/C-3], 6.47/167.7/128.5/120.3/116.5/45.9 [8-H<sub>Ar</sub>/C-15/C-5/C-10/C-6/C-4], 6.54/149.6/128.5/120.3/112.4/46.0/36.8/21.64 [1-NH/C-9/C-5/C-10/C-8/C-2/C-3/C-11], 7.50-7.52/167.7/149.6/112.3 [7-H<sub>Ar</sub>/C-15/C-9/C-8], 7.52/167.7/129.7/45.0 [5-H<sub>Ar</sub>/C-15/C-7/C-4], 8.21/169.5/120.3/45.0/36.8 [4-NH/C-13/C-10/C-4/C-3]; GC:  $R_t$  = 17.6 min, MS (EI),  $m/z$  (%): 204 (M<sup>+</sup>-44, 5), 161 (5), 144 (60), 130 (100), 77 (10); HRMS (ESI<sup>+</sup>):  $m/z$ : calcd for C<sub>13</sub>H<sub>17</sub>N<sub>2</sub>O<sub>3</sub> ([M+H]<sup>+</sup>) 249,1234, found: 249,1237; calcd for C<sub>13</sub>H<sub>16</sub>N<sub>2</sub>NaO<sub>3</sub> ([M+Na]<sup>+</sup>) 271,1053, found: 271,1049.

**cis-6-Acetyl-4-formamido-2-methyl-1,2,3,4-tetrahydroquinoline (3e):** Pale yellow solid (0.32 g, 1.38 mmol, 69 %),  $R_f$  [hexane-EtOAc 1:1] = 0.5; mp: 235-237 °C; FT-IR (KBr disk,  $\text{cm}^{-1}$ ): 3348, 3255, 3039, 1650, 1589, 1434, 1249, 817; <sup>1</sup>H NMR (400 MHz, DMSO-*d*<sub>6</sub>),  $\delta$ (ppm): 8.28 (d,  $J$  = 9.3 Hz, 1H, 4-NH), 8.23 (s, 1H, 4-COH), 7.56 (d,  $J$  = 1.3 Hz, 1H, 5-H<sub>Ar</sub>), 7.51 (dd,  $J$  = 8.5, 1.3 Hz, 1H, 7-H<sub>Ar</sub>), 6.51-6.42 (m, 2H, 1-NH and 8-H<sub>Ar</sub>), 5.12 (ddd,  $J$  = 12.2, 9.3, 4.2 Hz, 1H, 4-H<sub>ax</sub>), 3.55 (dq,  $J$  = 12.2, 6.3, 2.1 Hz, 1H, 2-H<sub>ax</sub>), 2.35 (s, 3H, 2-H<sub>ax</sub>), 2.04 (td,  $J$  = 12.2, 4.2, 2.1 Hz, 1H, 3-H<sub>eq</sub>), 1.42 (q,  $J$  = 12.2 Hz, 1H, 3-H<sub>ax</sub>), 1.18 (d,  $J$  = 6.3 Hz, 3H, 2-CH<sub>3</sub>); <sup>13</sup>C NMR (101 MHz, DMSO-*d*<sub>6</sub>),  $\delta$ (ppm): 194.5, 161.0 (+), 149.6, 128.9 (+), 127.1 (+), 124.4, 119.1, 112.0 (+), 45.8 (+), 43.6 (+), 36.4 (-), 25.5 (+), 21.3 (+); GC:  $R_t$  = 24.3 min, MS (EI),  $m/z$  (%): 232 (M<sup>+</sup>, 25), 217 (10), 186 (60), 172 (100), 161 (10), 144 (25), 129 (8); HRMS (ESI<sup>+</sup>):  $m/z$ : calcd for C<sub>13</sub>H<sub>17</sub>N<sub>2</sub>O<sub>2</sub> ([M+H]<sup>+</sup>) 233,1285, found: 233,1288; calcd for C<sub>13</sub>H<sub>16</sub>N<sub>2</sub>NaO<sub>2</sub> ([M+Na]<sup>+</sup>) 255,1104, found: 255,1106.

***cis-4-Formamido-2-methyl-1,2,3,4-tetrahydroquinoline (3f)***: White solid (0.26 g, 1.40 mmol, 70 %),  $R_f$  [hexane-EtOAc 1:1] = 0.6; mp: 151-153 °C; FT-IR (KBr disk, cm<sup>-1</sup>): 3286, 3023, 1666, 1527, 1496, 755; <sup>1</sup>H NMR (400 MHz, CDCl<sub>3</sub>),  $\delta$ (ppm): 8.29 (1H, s, 4-COH), 7.10 (1H, dd,  $J = 7.7$ , 0.84 Hz, 5-H<sub>Ar</sub>), 7.03 (1H, td,  $J = 7.7$ , 7.5, 0.58 Hz, 6-H<sub>Ar</sub>), 6.67 (1H, td,  $J = 7.5$ , 0.84 Hz, 7-H<sub>Ar</sub>), 6.49 (1H, dd,  $J = 7.5$ , 0.58 Hz, 8-H<sub>Ar</sub>), 5.87 (1H, d,  $J = 8.4$  Hz, 4-NH), 5.39 (1H, ddd,  $J = 11.4$ , 8.4, 6.2 Hz, 4-H<sub>ax</sub>), 3.78 (1H, s, 1-NH), 3.53 (1H, dqd,  $J = 11.4$ , 6.3, 2.1 Hz, 2-H<sub>ax</sub>), 2.26 (1H, ddd,  $J = 11.4$ , 6.2, 2.1 Hz, 3-H<sub>eq</sub>), 1.45 (1H, q,  $J = 11.4$  Hz, 3-H<sub>ax</sub>), 1.20 (3H, d,  $J = 6.3$  Hz, 2-CH<sub>3</sub>); <sup>13</sup>C NMR (101 MHz, CDCl<sub>3</sub>),  $\delta$ (ppm): 161.3 (+), 145.3, 128.53 (+), 127.02 (+), 120.87, 117.87 (+), 114.53 (+), 46.69 (+), 44.96 (+), 37.96 (-), 22.20 (+); GC:  $R_t$  = 16.7 min, MS (EI),  $m/z$  (%): 190 (M<sup>+</sup>, 25), 161 (10), 144 (45), 130 (100), 77 (15); HRMS (ESI<sup>+</sup>):  $m/z$ : calcd for C<sub>11</sub>H<sub>15</sub>N<sub>2</sub>O ([M+H]<sup>+</sup>) 191,1178, found: 191,1182; calcd for C<sub>11</sub>H<sub>14</sub>N<sub>2</sub>NaO ([M+Na]<sup>+</sup>) 213,0998, found: 213,1001.

***cis-4-Formamido-6-methoxy-2-methyl-1,2,3,4-tetrahydroquinoline (3g)***: White solid (0.28 g, 1.26 mmol, 63 %),  $R_f$  [hexane-EtOAc 1:1] = 0.6; mp: 151-153 °C; FT-IR (KBr disk, cm<sup>-1</sup>): 3286, 3239, 3023, 2838, 1666, 1542, 1265, 1234, 1033, 725; <sup>1</sup>H NMR (400 MHz, DMSO-d<sub>6</sub>),  $\delta$ (ppm): 8.35 (d,  $J = 8.4$  Hz, 1H, 4-NH), 8.19 (s, 1H, 4-COH), 6.59 (d,  $J = 8.4$  Hz, 1H, 7-H<sub>Ar</sub>), 6.53 (s, 1H, 5-H<sub>Ar</sub>), 6.45 (d,  $J = 8.4$  Hz, 1H, 8-H<sub>Ar</sub>), 5.30 (s, 1H, 1-NH), 5.12 (ddd,  $J = 11.5$ , 8.4, 3.5 Hz, 1H, 4-H<sub>ax</sub>), 3.60 (s, 3H, 6-OCH<sub>3</sub>), 3.36-3.34 (m, 1H, 2-H<sub>ax</sub>), 1.98-1.94 (m, 1H, 3-H<sub>eq</sub>), 1.39 (q,  $J = 11.5$  Hz, 1H, 3-H<sub>ax</sub>), 1.11 (d,  $J = 5.7$  Hz, 3H, 2-CH<sub>3</sub>); <sup>13</sup>C NMR (101 MHz, DMSO-d<sub>6</sub>),  $\delta$ (ppm): 161.2 (+), 150.7, 140.1, 121.9, 114.8 (+), 114.0 (+), 112.1 (+), 55.4 (+), 46.3 (+), 44.2 (+), 37.6 (-), 22.0 (+); COSY correlation [ $\delta_H/\delta_H$ ]: 1.11/3.36-3.34 [2-CH<sub>3</sub>/2-H<sub>ax</sub>], 1.39/3.36-3.34/1.96/5.12 [3-H<sub>ax</sub>/2-H<sub>ax</sub>/3-H<sub>eq</sub>/4-H<sub>ax</sub>], 1.96/3.36-3.34/1.39/5.12 [3-H<sub>eq</sub>/2-H<sub>ax</sub>/3-H<sub>ax</sub>/4-H<sub>ax</sub>], 3.36-3.34/1.96/1.39/1.11 [2-H<sub>ax</sub>/3-H<sub>eq</sub>/3-H<sub>ax</sub>/2-CH<sub>3</sub>], 5.12/8.35/1.96/1.39 [4-H<sub>ax</sub>/4-NH/3-H<sub>eq</sub>/3-H<sub>ax</sub>], 6.45/6.59 [8-H<sub>Ar</sub>/7-H<sub>Ar</sub>], 6.59/6.45 [7-H<sub>Ar</sub>/8-H<sub>Ar</sub>], 8.35/5.12 [4-NH/4-H<sub>ax</sub>]; HSQC correlation [ $\delta_H/\delta_C$ ]: 1.11/46.3 [2-CH<sub>3</sub>/C-11], 1.39/37.6 [3-H<sub>ax</sub>/C-3], 1.96/37.6 [3-H<sub>eq</sub>/C-3], 3.36-3.34/46.3 [2-H<sub>ax</sub>/C-2], 3.60/55.4 [6-OCH<sub>3</sub>/C-15], 5.12/44.2 [4-H<sub>ax</sub>/C-4], 6.45/114.8 [8-H<sub>Ar</sub>/C-8], 6.53/112.1 [5-H<sub>Ar</sub>/C-5], 6.59/114.0 [7-H<sub>Ar</sub>/C-7]; HMBC correlation [ $\delta_H/\delta_C$ ]: 1.11/46.3/37.6 [2-CH<sub>3</sub>/C-2/C-3], 1.39/121.8/46.3/44.2/22.0 [3-H<sub>ax</sub>/C-9/C-2/C-4/C-11], 1.96/121.8/44.2 [3-H<sub>eq</sub>/C-9/C-4], 3.60/150.7 [6-OCH<sub>3</sub>/C-6], 5.12/161.2/121.8/37.9 [4-H<sub>ax</sub>/C-13/C-9/C-3], 5.30/121.8/114.8/37.6/22.0 [1-NH/C-9/C-8/C-3/C-11], 6.45/150.7/121.8/112.1/44.2 [8-H<sub>Ar</sub>/C-6/C-9/C-5/C-4], 6.53/150.7/140.1/114.0/44.2 [5-H<sub>Ar</sub>/C-6/C-10/C-7/C-4], 6.59/150.7/140.1/112.1 [7-H<sub>Ar</sub>/C-6/C-10/C-5], 8.19/44.2 [4-COH/C-4], 8.3/161.2/44.2 [4-NH/C-13/C-4]; GC:  $R_t$  = 20.4 min, MS (EI),  $m/z$  (%): 220 (M<sup>+</sup>, 35), 160 (100), 145 (10), 130 (15), 117 (15); HRMS (ESI<sup>+</sup>):  $m/z$ : calcd for C<sub>12</sub>H<sub>17</sub>N<sub>2</sub>O<sub>2</sub> ([M+H]<sup>+</sup>) 221,1285, found: 221,1282; calcd for C<sub>12</sub>H<sub>16</sub>N<sub>2</sub>NaO<sub>2</sub> ([M+Na]<sup>+</sup>) 243,1104, found: 243,1101.

***cis-6-Carboxy-4-formamido-2-methyl-1,2,3,4-tetrahydroquinoline (3h)***: White solid (0.38 g, 1.62 mmol, 81 %),  $R_f$  [hexane-EtOAc 1:2] = 0.4; mp: 208-210 °C; FT-IR (KBr disk, cm<sup>-1</sup>): 3394, 2962, 2653, 2561, 1666, 1604, 1527, 1419, 1280, 1172, 833, 771; <sup>1</sup>H NMR (400 MHz, DMSO-d<sub>6</sub>), δ(ppm): 12.05 (br., s, 1H, 6-COOH), 8.41 (d,  $J$  = 8.9 Hz, 1H, 4-NH), 8.25 (s, 1H, 4-COH), 7.53 (s, 1H, 5-H<sub>Ar</sub>), 7.50-7.52 (m, 1H, 7-H<sub>Ar</sub>), 6.57 (s, 1H, 1-NH), 6.48 (d,  $J$  = 8.3 Hz, 1H, 8-H<sub>Ar</sub>), 5.11 (ddd,  $J$  = 11.8, 8.9, 6.5 Hz, 1H, 4-H<sub>ax</sub>), 3.59-3.51 (m, 1H, 2-H<sub>ax</sub>), 2.02-1.93 (m, 1H, 3-H<sub>eq</sub>), 1.41 (q,  $J$  = 11.8 Hz, 1H, 3-H<sub>ax</sub>), 1.17 (d,  $J$  = 6.1 Hz, 3H, 2-CH<sub>3</sub>); <sup>13</sup>C NMR (101 MHz, DMSO-d<sub>6</sub>), δ(ppm): 167.6, 161.3 (+), 149.5, 129.8 (+), 128.5 (+), 119.5, 116.7, 112.4 (+), 45.9 (+), 43.6 (+), 36.5 (-), 21.5 (+); COSY correlation [ $\delta_H/\delta_H$ ]: 1.17/3.59-3.51 [2-CH<sub>3</sub>/2-H<sub>ax</sub>], 1.41/5.11/3.59-3.51/2.02-1.93 [3-H<sub>ax</sub>/4-H<sub>ax</sub>/2-H<sub>ax</sub>/3-H<sub>eq</sub>], 2.02-1.93/5.11/3.59-3.51/1.41 [3-H<sub>eq</sub>/4-H<sub>ax</sub>/2-H<sub>ax</sub>/3-H<sub>ax</sub>], 3.59-3.51/2.02-1.93/1.41/1.17 [2-H<sub>ax</sub>/3-H<sub>eq</sub>/3-H<sub>ax</sub>/2-CH<sub>3</sub>], 5.11/8.41/1.93-2.02/1.41 [4-H<sub>ax</sub>/4-NH/3-H<sub>eq</sub>/3-H<sub>ax</sub>], 7.50-7.52/6.48 [7-H<sub>Ar</sub>/8-H<sub>Ar</sub>], 8.41/5.11 [4-NH/4-H<sub>ax</sub>]; HSQC correlation [ $\delta_H/\delta_C$ ]: 1.17/21.5 [2-CH<sub>3</sub>/C-11], 2.02-1.9/1.41/36.5 [3-H<sub>eq</sub>/3-H<sub>ax</sub>/C-3], 3.59-3.51/45.9 [2-H<sub>ax</sub>/C-2], 5.11/43.6 [4-H<sub>ax</sub>/C-4], 6.48/112.4 [8-H<sub>Ar</sub>/C-8], 7.50-7.52/129.8 [7-H<sub>Ar</sub>/C-7], 7.53/128.5 [5-H<sub>Ar</sub>/C-5], 8.25/161.3 [4-COH/C-13]; HMBC correlation [ $\delta_H/\delta_C$ ]: 1.17/36.5/45.9 [2-CH<sub>3</sub>/C-3/C-2], 1.41/45.9/43.6/21.5 [3-H<sub>ax</sub>/C-2/C-4/C-11], 2.02-1.93/43.6/119.5 [3-H<sub>eq</sub>/C-4/C-9], 5.11/36.6 [4-H<sub>ax</sub>/C-3], 6.48/119.5/116.7 [8-H<sub>Ar</sub>/C-9/C-6], 6.57/149.5/119.5/112.4/45.9/36.5/21.5 [1-NH/C-10/C-9/C-8/C-2/C-3/C-11], 7.50-7.52/167.6/149.5/128.5/112.4 [7-H<sub>Ar</sub>/C-14/C-10/C-5/C-8], 7.53/149.5/129.8/43.6 [5-H<sub>Ar</sub>/C-10/C-7/C-4], 8.25/43.6 [4-COH/C-4], 8.41/161.3/43.6/36.5 [4-NH/C-13/C-4/C-3]; GC:  $R_t$  = 23.3 min, MS (EI),  $m/z$  (%): 190 (M<sup>+</sup>-44, 30), 161 (5) 145 (63), 130 (100), 103 (5), 77 (15); HRMS (ESI<sup>+</sup>):  $m/z$ : calcd for C<sub>12</sub>H<sub>15</sub>N<sub>2</sub>O<sub>3</sub> ([M+H]<sup>+</sup>) 235,1077, found: 235,1081; calcd for C<sub>12</sub>H<sub>14</sub>N<sub>2</sub>NaO<sub>3</sub> ([M+Na]<sup>+</sup>) 257,0897, found: 257,0897.

***cis-6-Acetyl-4-(pyrrolidinyl-2-one)-2-methyl-1,2,3,4-tetrahydroquinoline (3i)***: White solid (0.44 g, 1.62 mmol, 81 %),  $R_f$  [hexane-EtOAc 1:1] = 0.5; mp: 165-167 °C; FT-IR (KBr disk, cm<sup>-1</sup>): 3332, 2962, 2915, 2885, 1681, 1573, 1434, 956, 833; <sup>1</sup>H NMR (400 MHz, DMSO-d<sub>6</sub>), δ(ppm): 7.57 (dd,  $J$  = 8.5, 1.7 Hz, 1H, 7-H<sub>Ar</sub>), 7.21 (s, 1H, 5-H<sub>Ar</sub>), 6.77 (s, 1H, 1-NH), 6.53 (d,  $J$  = 8.5 Hz, 1H, 8-H<sub>Ar</sub>), 5.25 (dd,  $J$  = 11.9, 5.2 Hz, 1H, 4-H<sub>ax</sub>), 3.61 (ddd,  $J$  = 11.9, 6.3, 2.3 Hz, 1H, 2-H<sub>ax</sub>), 3.26-3.19 (m, 1H, 5'-H<sub>b</sub>), 3.03-2.96 (m, 1H, 5'-H<sub>a</sub>), 2.41-2.34 (m, 2H, 3'-H<sub>a</sub> and 3'-H<sub>b</sub>), 2.36 (s, 3H, 6-COCH<sub>3</sub>), 2.02-1.89 (m, 2H, 4'-H<sub>a</sub> and 4'-H<sub>b</sub>), 1.81 (ddd,  $J$  = 11.9, 5.2, 2.3 Hz, 1H, 3-H<sub>eq</sub>), 1.63 (q,  $J$  = 11.9 Hz, 1H, 3-H<sub>ax</sub>), 1.19 (d,  $J$  = 6.3 Hz, 3H, 2-CH<sub>3</sub>); <sup>13</sup>C NMR (101 MHz, DMSO-d<sub>6</sub>), δ(ppm): 194.9, 174.8, 150.6, 129.5 (+), 126.3 (+), 124.6, 116.8, 112.5 (+), 47.2 (+), 46.0 (+), 41.7 (+), 39.5 (-), 33.1 (-), 30.8 (-), 25.9 (+), 21.4 (+), 18.1 (-); NOESY correlation [ $\delta_H/\delta_H$ ]: 1.81/1.63 [3-H<sub>eq</sub>/3-H<sub>ax</sub>], 3.03-2.96/2.02-1.89 [5'-H<sub>a</sub>/4'-H<sub>a</sub> and 4'-H<sub>b</sub>], 3.26-3.19/2.02-1.89 [5'-H<sub>b</sub>, 4'-H<sub>a</sub> and 4'-H<sub>b</sub>], 3.61/1.19/1.63 [2-H<sub>ax</sub>/2-CH<sub>3</sub>/3-H<sub>ax</sub>], 5.25/1.63/1.81 [4-H<sub>ax</sub>/3-H<sub>ax</sub>/3-H<sub>eq</sub>], 7.57/6.53 [7-H<sub>Ar</sub>/8-H<sub>Ar</sub>]; COSY correlation [ $\delta_H/\delta_H$ ]: 1.19/3.61 [2-CH<sub>3</sub>/2-H<sub>ax</sub>], 1.63/5.25/3.61/1.81 [3-H<sub>ax</sub>/4-H<sub>ax</sub>/2-H<sub>ax</sub>/3-H<sub>eq</sub>], 1.81/5.25/3.61/1.63 [3-H<sub>eq</sub>/4-H<sub>ax</sub>/2-H<sub>ax</sub>/3-H<sub>ax</sub>], 2.02-

1.89/3.26-3.19/3.03-2.96/2.41-2.34 [4'-H<sub>a</sub>,4'-H<sub>b</sub>/5'-H<sub>b</sub>/5'-H<sub>a</sub>/3'-H<sub>a</sub>,3'-H<sub>b</sub>], 2.41-2.34/2.02-1.89 [3'-H<sub>a</sub>,3'-H<sub>b</sub>/4'-H<sub>a</sub>,4'-H<sub>b</sub>], 3.03-2.96/3.26-3.19/2.02-1.89 [5'-H<sub>a</sub>/5'-H<sub>b</sub>/4'-H<sub>a</sub>,4'-H<sub>b</sub>], 3.26-3.19/3.03-2.96/2.02-1.89 [5'-H<sub>b</sub>/5'-H<sub>a</sub>/4'-H<sub>a</sub>,4'-H<sub>b</sub>], 3.61/1.81/1.63/1.19 [2-H<sub>ax</sub>/3-H<sub>eq</sub>/3-H<sub>ax</sub>/2-CH<sub>3</sub>], 5.25/1.81/1.63 [4-H<sub>ax</sub>/3-H<sub>eq</sub>/3-H<sub>ax</sub>], 6.53/7.57 [8-H<sub>Ar</sub>/7-H<sub>Ar</sub>], 7.21/7.57 [5-H<sub>Ar</sub>/7-H<sub>Ar</sub>], 7.57/7.21/6.53 [7-H<sub>Ar</sub>/5-H<sub>Ar</sub>/8-H<sub>Ar</sub>]; HSQC correlation [ $\delta_H/\delta_C$ ]: 1.19/21.4 [2-CH<sub>3</sub>/C-11], 1.81/1.63/33.1 [3-H<sub>eq</sub>/3-H<sub>ax</sub>/C-3], 2.02-1.89/18.1 [4'-H<sub>a</sub>,4'-H<sub>b</sub>/C-15], 2.36/25.9 [6-COCH<sub>3</sub>/C-18], 3.26-3.19, 3.03-2.96/41.7 [5'-H<sub>b</sub>, 5'-H<sub>a</sub>/C-16], 3.61/46.0 [2-H<sub>ax</sub>/C-2], 5.25/47.2 [4-H<sub>ax</sub>/C-4], 6.53/112.5 [8-H<sub>Ar</sub>/C-8], 7.21/126.3 [5-H<sub>Ar</sub>/C-5], 7.57/129.5 [7-H<sub>Ar</sub>/C-7]; HMBC correlation [ $\delta_H/\delta_C$ ]: 1.19/47.2/46.0/33.1/30.8 [2-CH<sub>3</sub>/C-4/C-2/C-3/C-14], 1.63/47.2/46.0/21.4 [3-H<sub>ax</sub>/C-4/C-2/C-11], 1.81/47.2/46.0 [3-H<sub>eq</sub>/C-4/C-2], 2.02-1.89/174.8/41.7/30.8 [4'-H<sub>a</sub>,4'-H<sub>b</sub>/C-13/C-16/C-14], 2.36/194.9 [6-COCH<sub>3</sub>/C-17], 2.41-2.34/174.8/41.7/18.1 [3'-H<sub>a</sub>,3'-H<sub>b</sub>/C-13/C-16/C-15], 3.26-3.19,3.03-2.96/174.8/30.8/18.1 [5'-H<sub>b</sub>,5'-H<sub>a</sub>/C-13/C-14/C-15], 5.25/174.8 /116.8/41.7/33.1 [4-H<sub>ax</sub>/C-13/C-9/C-16/C-3], 6.53/124.6/116.8/47.2 [8-H<sub>Ar</sub>/C-10/C-9/C4], 6.77/116.8/112.5/46.0/33.1/21.4 [1-NH/C-9/C-8/C-2/C-3/C-11], 7.21/194.9/150.6/129.6 /47.2 [5-H<sub>Ar</sub>/C-17/C-6/C-7/C-4], 7.57/194.9/150.6/126.3 [7-H<sub>Ar</sub>/C-17/C-6/C-5]; GC: *R*<sub>t</sub> = 23.6 min, MS (EI), *m/z* (%): 272 (M<sup>+</sup>,5), 257 (3), 243(3), 187 (65), 172 (100); HRMS (ESI<sup>+</sup>): *m/z*: calcd for C<sub>16</sub>H<sub>21</sub>N<sub>2</sub>O<sub>2</sub> ([M+H]<sup>+</sup>) 273,1598, found: 273,1601; calcd for C<sub>16</sub>H<sub>20</sub>N<sub>2</sub>NaO<sub>2</sub> ([M+Na]<sup>+</sup>) 295,1417, found: 295,1419.

**cis-4-(pyrrolidinyl-2-one)-2-methyl-1,2,3,4-tetrahydroquinoline (3j):** White solid (0.32 g, 1.4 mmol, 70 %), *R*<sub>f</sub> [hexane-EtOAc 1:1] = 0.6; mp: 190-192 °C; FT-IR (KBr disk, cm<sup>-1</sup>): 3317, 3039, 2977, 2946, 2885, 1666, 1604, 1496, 1265, 755; <sup>1</sup>H NMR (400 MHz, DMSO-d<sub>6</sub>),  $\delta$ (ppm): 6.91 (td, *J* = 7.5, 7.5, 0.9 Hz, 1H, 7-H<sub>Ar</sub>), 6.62 (d, *J* = 7.5 Hz, 1H, 5-H<sub>Ar</sub>), 6.53-6.44 (m, 2H, 6-H<sub>Ar</sub> and 8-H<sub>Ar</sub>), 5.72 (s, 1H, 1-NH), 5.27 (dd, *J* = 11.8, 5.7 Hz, 1H, 4-H<sub>ax</sub>), 3.48 (dq, *J* = 11.8, 6.2, 2.1 Hz, 1H, 2-H<sub>ax</sub>), 3.19 (dt, *J* = 9.4, 7.2 Hz, 1H, 5'-H<sub>b</sub>), 2.95 (dt, *J* = 9.4, 6.7 Hz, 1H, 5'-H<sub>a</sub>), 2.42-2.26 (m, 2H, 3'-H<sub>a</sub> and 3'-H<sub>b</sub>), 1.96-1.87 (m, 2H, 4'-H<sub>a</sub> and 4'-H<sub>b</sub>), 1.75 (ddd, *J* = 11.8, 5.7, 2.1 Hz, 1H, 3-H<sub>eq</sub>), 1.62 (q, *J* = 11.8 Hz, 1H, 3-H<sub>ax</sub>), 1.15 (d, *J* = 6.2 Hz, 3H, 2-CH<sub>3</sub>); <sup>13</sup>C NMR (101 MHz, DMSO-d<sub>6</sub>),  $\delta$ (ppm): 174.7, 146.5, 127.7 (+), 125.8 (+), 117.8, 115.8 (+), 114.0 (+), 47.5 (+), 46.1 (+), 41.6 (-), 33.7 (-), 30.8 (-), 21.9 (+), 17.8 (-); COSY correlation [ $\delta_H/\delta_H$ ]: 3.19/2.95/1.96-1.87 [5'-H<sub>b</sub>/5'-H<sub>a</sub>/3'-H<sub>a</sub>, 3'-H<sub>b</sub>], 3.48/1.75/1.62/1.15 [2-H<sub>ax</sub>/3-H<sub>eq</sub>/3-H<sub>ax</sub>/2-CH<sub>3</sub>], 5.27/1.75/1.62 [4-H<sub>ax</sub>/3-H<sub>eq</sub>/3-H<sub>ax</sub>], 6.91/ 6.53-6.44 [7-H<sub>Ar</sub>/6-H<sub>Ar</sub>,8-H<sub>Ar</sub>], HSQC correlation [ $\delta_H/\delta_C$ ]: 1.15/21.9 [2-CH<sub>3</sub>/C-11], 1.62/33.7 [3-H<sub>ax</sub>/C-3], 1.75/33.7 [3-H<sub>eq</sub>/C-3], 1.96-1.87/17.8 [4'-H<sub>a</sub>, 4'-H<sub>b</sub>/C-15], 2.42-2.26/30.8 [3'-H<sub>a</sub>, 3'-H<sub>b</sub>/C-14], 2.95/41.6 [5'-H<sub>a</sub>/C-16], 3.19/41.6 [5'-H<sub>b</sub>/C-16], 3.48/46.1 [2-H<sub>ax</sub>/C-2], 5.72/47.5 [4-H<sub>ax</sub>/C-4], 6.53-6.44/115.8,114.0 [6-H<sub>Ar</sub>, 8-H<sub>Ar</sub> /C-6, C-8], 6.62/125.8 [5-H<sub>Ar</sub>/C-5], 6.91/127.7 [7-H<sub>Ar</sub>/C-7]; HMBC correlation [ $\delta_H/\delta_C$ ]: 1.15/146.5/46.1/33.7 [2-CH<sub>3</sub>/C-10/C-2/C-3], 1.62/ 117.8/47.5/46.1/21.9 [3-H<sub>ax</sub>/C-9/C-4/C-2/C-11], 1.75/125.8/117.8/47.5/21.9/17.8 [3-H<sub>eq</sub>/C-5/C-9/C-4/C-11/C-15], 1.96-1.87/174.7/41.6/33.7/30.8 [4'-H<sub>a</sub>,4'-H<sub>b</sub>/C-13/C-16/C-3/C-14], 2.42-2.26/174.7/

41.6/17.8 [3'-H<sub>a</sub>, 3'-H<sub>b</sub>/C-13/C-16/C-15], 2.95/174.7/30.8/17.8 [5'-H<sub>a</sub>/C-13/C-14/C-15], 3.19/174.7/30.8/17.8 [5'-H<sub>b</sub>/C-13/C-14/C-15], 5.27/117.8/41.6/33.7 [4-H<sub>ax</sub>/C-9/C-16/C-3], 5.72/117.8/114.9/46.1/33.7/21.9 [1-NH/C-9/C-8/C-2/C-3/C-11], 6.53-6.44/127.6/117.8/115.8/114.0 [6-H<sub>Ar</sub>,8-H<sub>Ar</sub>/C-7/C-9/C-6/C-8], 6.62/146.5/127.6/47.5 [5-H<sub>Ar</sub>/C-10/C-7/C-4], 6.91/146.5/125.8/117.8/114.0 [7-H<sub>Ar</sub>/C-10/C-5/C-9/C-8]; GC: R<sub>t</sub>= 21.1 min, MS (EI), *m/z* (%): 230 (M<sup>+</sup>, 8), 201 (4), 144 (52), 130 (100), 77 (10); HRMS (ESI<sup>+</sup>): *m/z*: calcd for C<sub>14</sub>H<sub>19</sub>N<sub>2</sub>O ([M+H]<sup>+</sup>) 231,1492, found: 231,1495; calcd for C<sub>14</sub>H<sub>18</sub>N<sub>2</sub>NaO ([M+Na]<sup>+</sup>) 253,1311, found: 253,1311.

***cis-6-Methoxy-4-(pyrrolidinyl-2-one)-2-methyl-1,2,3,4-tetrahydroquinoline*** (3k):

Yellow oil (0.44 gr, 1.68 mmol, 84 %), R<sub>f</sub> [hexane-EtOAc 1:1] = 0.7; FT-IR (liquid film, cm<sup>-1</sup>): 3332, 2962, 1666, 1496, 1434, 1280, 1033, 817; <sup>1</sup>H NMR (400 MHz, DMSO-d<sub>6</sub>), δ(ppm): 6.59 (dd, *J* = 8.7, 2.7 Hz, 1H, 7-H<sub>Ar</sub>), 6.47 (d, *J* = 8.7 Hz, 1H, 8-H<sub>Ar</sub>), 6.22 (d, *J* = 2.7 Hz, 1H, 5-H<sub>Ar</sub>), 5.31 (s, 1H, 1-NH), 5.27 (dd, *J* = 11.9, 6.1 Hz, 1H, 4-H<sub>ax</sub>), 3.59 (s, 3H, 6-OCH<sub>3</sub>), 3.42-3.34 (m, 1H, 2-H<sub>ax</sub>), 3.19 (1H, dt, *J* = 9.6, 7.4 Hz, 5'-H<sub>b</sub>), 2.95 (dt, *J* = 9.6, 6.7 Hz, 1H, 5'-H<sub>a</sub>), 2.43-2.26 (m, 2H, 3'-H<sub>a</sub> and 3'-H<sub>b</sub>), 1.96-1.88 (m, 2H, 4'-H<sub>a</sub> and 4'-H<sub>b</sub>), 1.73 (ddd, 1H, *J* = 11.9, 6.1, 1.80 Hz, 3-H<sub>eq</sub>), 1.60 (q, *J* = 11.9 Hz, 1H, 3-H<sub>ax</sub>), 1.13 (d, *J* = 6.2 Hz, 3H, 2-CH<sub>3</sub>); <sup>13</sup>C NMR (101 MHz, DMSO-d<sub>6</sub>), δ(ppm): 174.7, 150.9, 140.8, 119.2, 115.3 (+), 113.9 (+), 111.2 (+), 55.3 (+), 47.7 (+), 46.5 (+), 41.7 (-), 33.9 (-), 30.8 (-), 21.9 (+), 17.9 (-); COSY correlation [δ<sub>H</sub>/δ<sub>H</sub>]: 1.13/3.42-3.34 [2-CH<sub>3</sub>/2-H<sub>ax</sub>], 1.60/5.27/1.73 [3-H<sub>ax</sub>/4-H<sub>ax</sub>/3-H<sub>eq</sub>], 1.73/5.27/1.60 [3-H<sub>eq</sub>/4-H<sub>ax</sub>/3-H<sub>ax</sub>], 1.96-1.88/3.23-3.15/2.95/2.43-2.26 [4'-H<sub>a</sub>, 4'-H<sub>b</sub>/5'-H<sub>b</sub>/5'-H<sub>a</sub>/3'-H<sub>a</sub>, 3'-H<sub>b</sub>], 2.43-2.26/1.96-1.88 [3'-H<sub>a</sub>, 3'-H<sub>b</sub>/4'-H<sub>a</sub>, 4'-H<sub>b</sub>], 2.95/3.19/1.96-1.88 [5'-H<sub>a</sub>/5'-H<sub>b</sub>/4'-H<sub>a</sub>, 4'-H<sub>b</sub>], 3.23-3.15/2.95/1.96-1.88 [5'-H<sub>b</sub>/5'-H<sub>a</sub>/4'-H<sub>a</sub>, 4'-H<sub>b</sub>], 3.42-3.34/1.60/1.13 [2-H<sub>ax</sub>/3-H<sub>ax</sub>/2-CH<sub>3</sub>], 5.27/1.73/1.60 [4-H<sub>ax</sub>/3-H<sub>eq</sub>/3-H<sub>ax</sub>], 6.22/6.59 [5-H<sub>Ar</sub>/7-H<sub>Ar</sub>], 6.47/6.59 [8-H<sub>Ar</sub>/7-H<sub>Ar</sub>], 6.59/6.47/6.22 [7-H<sub>Ar</sub>/8-H<sub>Ar</sub>/5-H<sub>Ar</sub>]; HSQC correlation [δ<sub>H</sub>/δ<sub>C</sub>]: 1.13/21.9 [2-CH<sub>3</sub>/C-11], 1.73/1.60/33.9 [3-H<sub>eq</sub>/3-H<sub>ax</sub>/C-3], 1.96-1.88/17.9 [4'-H<sub>a</sub>, 4'-H<sub>b</sub>/C-15], 2.43-2.26/30.8 [3'-H<sub>a</sub>, 3'-H<sub>b</sub>/C-14], 3.23-3.15/2.95/41.7 [5'-H<sub>b</sub>/5'-H<sub>a</sub>/C-16], 3.42-3.34/46.5 [2-H<sub>ax</sub>/C-2], 3.59/55.3 [6-OCH<sub>3</sub>/C-18], 5.27/47.7 [4-H<sub>ax</sub>/C-4], 6.22/111.2 [5-H<sub>Ar</sub>/C-5], 6.47/115.3 [8-H<sub>Ar</sub>/C-8], 6.59/113.9 [7-H<sub>Ar</sub>/C-7]; HMBC correlation [δ<sub>H</sub>/δ<sub>C</sub>]: 1.13/46.5/33.9 [2-CH<sub>3</sub>/C-2/C-3], 1.73,1.60/ 47.7/46.5/21.9 [3-H<sub>eq</sub>, 3-H<sub>eq</sub>/C-4/C-2/C-11], 1.96-1.88/30.8/41.7/174.7 [4'-H<sub>a</sub>, 4'-H<sub>b</sub>/C-14/C-16/C-13], 2.43-2.26/17.9/41.7/174.7 [3'-H<sub>a</sub>, 3'-H<sub>b</sub>/C-15/C-16/C-13], 3.23-3.15,2.95/17.9/30.8/174.7 [5'-H<sub>b</sub>, 5'-H<sub>b</sub>/C-15/C-14/C-13], 3.59/150.9 [6-OCH<sub>3</sub>/C-6], 5.27/174.7/140.7/119.2/111.2/41.7/33.9 [4-H<sub>ax</sub>/C-13/C-10/C-9/C-5/C-16/C-3], 5.31/119.2/33.9 [1-NH/C-9/C-3], 6.22/47.7/113.9/119.2/140.8/150.9 [5-H<sub>Ar</sub>/C-4/C-7/C-9/C-10/C-6], 6.47/47.7/111.2/119.2/140.8/150.9 [8-H<sub>Ar</sub>/C-4/C-5/C-9/C-10/C-6], 6.59/111.2/119.2/140.8/150.9 [7-H<sub>Ar</sub>/C-5/C-9/C-10/C-6]; GC: R<sub>t</sub>= 23.2 min, MS (EI), *m/z* (%): 260 (M<sup>+</sup>, 45), 245 (3), 175 (20), 174 (60), 160 (100), 77 (4); HRMS (ESI<sup>+</sup>): *m/z*: calcd for C<sub>15</sub>H<sub>21</sub>N<sub>2</sub>O<sub>2</sub> ([M+H]<sup>+</sup>) 261,1598, found: 261,1595; calcd for C<sub>15</sub>H<sub>20</sub>N<sub>2</sub>NaO<sub>2</sub> ([M+Na]<sup>+</sup>) 283,1417, found: 283,1419.



**cis-6-Carboxy-4-(pyrrolidinyl-2-one)-2-methyl-1,2,3,4-tetrahydroquinoline (3l):** White solid (0.4 gr, 1.44 mmol, 72 %),  $R_f$  [hexane-EtOAc 1:2] = 0.3; mp: 233-237 °C; FT-IR (KBr disk, cm<sup>-1</sup>): 3347, 2962, 2854, 1697, 1635, 1527, 1326, 1172, 771; <sup>1</sup>H NMR (400 MHz, DMSO-d<sub>6</sub>),  $\delta$ (ppm): 12.04 (s, 1H, 6-COOH), 7.51 (d, 1H, 7-H<sub>Ar</sub>), 7.22 (s, 1H, 5-H<sub>Ar</sub>), 6.59 (s, 1H, 1-NH), 6.52 (d,  $J$  = 8.4 Hz, 1H, 8-H<sub>Ar</sub>), 5.25 (dd,  $J$  = 12.0, 4.7 Hz, 1H, 4-H<sub>ax</sub>), 3.62-3.54 (m, 1H, 2-H<sub>ax</sub>), 3.26-3.19 (m, 1H, 5'-H<sub>b</sub>), 2.98 (td,  $J$  = 8.3, 4.5 Hz, 1H, 5'-H<sub>a</sub>), 2.38-2.34 (m, 2H, 3'-H<sub>a</sub> and 3'-H<sub>b</sub>), 2.00-1.89 (m, 2H, 4'-H<sub>a</sub> and 4'-H<sub>b</sub>), 1.79 (ddd,  $J$  = 12.0, 4.7, 2.6 Hz, 1H, 3-H<sub>eq</sub>), 1.63 (q,  $J$  = 12.0 Hz, 1H, 3-H<sub>ax</sub>), 1.18 (d,  $J$  = 6.1 Hz, 3H, 2-CH<sub>3</sub>); <sup>13</sup>C NMR (101 MHz, DMSO-d<sub>6</sub>),  $\delta$ (ppm): 174.8, 167.6, 150.2, 129.8 (+), 127.5 (+), 116.8, 112.8 (+), 47.2 (+), 46.0 (+), 41.7 (-), 33.1 (-), 30.8 (-), 21.5, 18.0 (-); COSY correlation [ $\delta_H/\delta_H$ ]: 1.18/3.62-3.54 [2-CH<sub>3</sub>/2-H<sub>ax</sub>], 1.63/5.25/3.62-3.54/1.79 [3-H<sub>ax</sub>/4-H<sub>ax</sub>/2-H<sub>ax</sub>/3-H<sub>eq</sub>], 1.79/5.25/3.62-3.54/1.63 [3-H<sub>eq</sub>/4-H<sub>ax</sub>/2-H<sub>ax</sub>/3-H<sub>ax</sub>], 2.00-1.89/3.26-3.19/2.98/2.38-2.34 [4'-H<sub>a</sub>,4'-H<sub>b</sub>/5'-H<sub>b</sub>/5'-H<sub>a</sub>/3'-H<sub>a</sub>, 3'-H<sub>b</sub>], 2.38-2.34/2.00-1.89 [3'-H<sub>a</sub>,3'-H<sub>b</sub>/4'-H<sub>a</sub>, 4'-H<sub>b</sub>], 2.98/3.26-3.19/2.00-1.89 [5'-H<sub>a</sub>/5'-H<sub>b</sub>/4'-H<sub>a</sub>,4'-H<sub>b</sub>], 3.26-3.19/2.98/2.00-1.89 [5'-H<sub>b</sub>/5'-H<sub>a</sub>/4'-H<sub>a</sub>, 4'-H<sub>b</sub>], 3.62-3.54/1.79/1.63/1.18 [2-H<sub>ax</sub>/3-H<sub>eq</sub>/3-H<sub>ax</sub>/2-CH<sub>3</sub>], 5.25/1.79/1.63 [4-H<sub>ax</sub>/3-H<sub>eq</sub>/3-H<sub>ax</sub>], 6.52/7.51 [8-H<sub>Ar</sub>/7-H<sub>Ar</sub>], 7.51/6.52 [7-H<sub>Ar</sub>/8-H<sub>Ar</sub>]; HSQC correlation [ $\delta_H/\delta_C$ ]: 1.18/21.5 [2-CH<sub>3</sub>/C-11], 1.79, 1.63/33.1 [3-H<sub>eq</sub>, 3-H<sub>ax</sub>/C-3], 2.00-1.89/18.0 [4'-H<sub>a</sub>, 4'-H<sub>b</sub>/C-15], 2.38-2.34/30.8 [3'-H<sub>a</sub>,3'-H<sub>b</sub>/C-14], 3.26-3.19, 2.98/41.7 [5'-H<sub>b</sub>, 5'-H<sub>b</sub>/C-16], 3.62-3.54/46.0 [2-H<sub>ax</sub>/C-2], 5.25/47.2 [4-H<sub>ax</sub>/C-4], 6.52/112.8 [8-H<sub>Ar</sub>/C-8], 7.22/127.5 [5-H<sub>Ar</sub>/C-5], 7.51/129.8 [7-H<sub>Ar</sub>/C-7]; HMBC correlation [ $\delta_H/\delta_C$ ]: 1.18/46.0/33.1 [2-CH<sub>3</sub>/C-2/C-3], 1.63/46.0/47.2/21.5 [3-H<sub>ax</sub>/C-2/C-4/C-11], 1.79/47.2/46.0 [3-H<sub>eq</sub>/C-4/C-2], 2.00-1.89/174.8/41.7/30.8 [4'-H<sub>a</sub>,4'-H<sub>b</sub>/C-13/C-16/C-14], 2.38-2.34/174.8/41.7/18.0 [3'-H<sub>a</sub>,3'-H<sub>b</sub>/C-13/C-16/C-15], 3.26-3.19,2.98/174.8/18.0 [5'-H<sub>b</sub>,5'-H<sub>a</sub>/C-13/C-15], 5.25/116.8/33.1 [4-H<sub>ax</sub>/C-9/C-3], 6.52/129.8/116.8 [8-H<sub>Ar</sub>/C-7/C-9], 6.59/116.8/112.8/46.0/33.1/21.5 [1-NH/C-9/C-8/C-2/C-3/C-11], 7.22/167.6/150.2/129.8/47.2 [5-H<sub>Ar</sub>/C-17/C-6/C-7/C-4], 7.51/167.6/150.2/127.5/112.8 [7-H<sub>Ar</sub>/C-17/C-6/C-5/C-8]; GC:  $R_t$  = 24.9 min, MS (EI),  $m/z$  (%): 230 (M<sup>+</sup>-44, 30), 201 (10), 159 (5), 145 (70), 130 (100), 103 (8), 77 (12); HRMS (ESI<sup>+</sup>):  $m/z$ : calcd for C<sub>15</sub>H<sub>19</sub>N<sub>2</sub>O<sub>3</sub> ([M+H]<sup>+</sup>) 275,1390, found: 275,1394; calcd for C<sub>15</sub>H<sub>18</sub>N<sub>2</sub>NaO<sub>3</sub> ([M+Na]<sup>+</sup>) 297,1210, found: 297,1207.

### 3. Copies of <sup>1</sup>H NMR, <sup>13</sup>C NMR, DEPT-135, COSY, HSQC and HMBC charts of the synthesized 2-methyltetrahydroquinolines 3a-l.

**Figure ESI 1.** <sup>1</sup>H-NMR spectrum of *cis*-4-Acetamido-6-acetyl-2-methyl-1,2,3,4-tetrahydroquinoline **3a**.

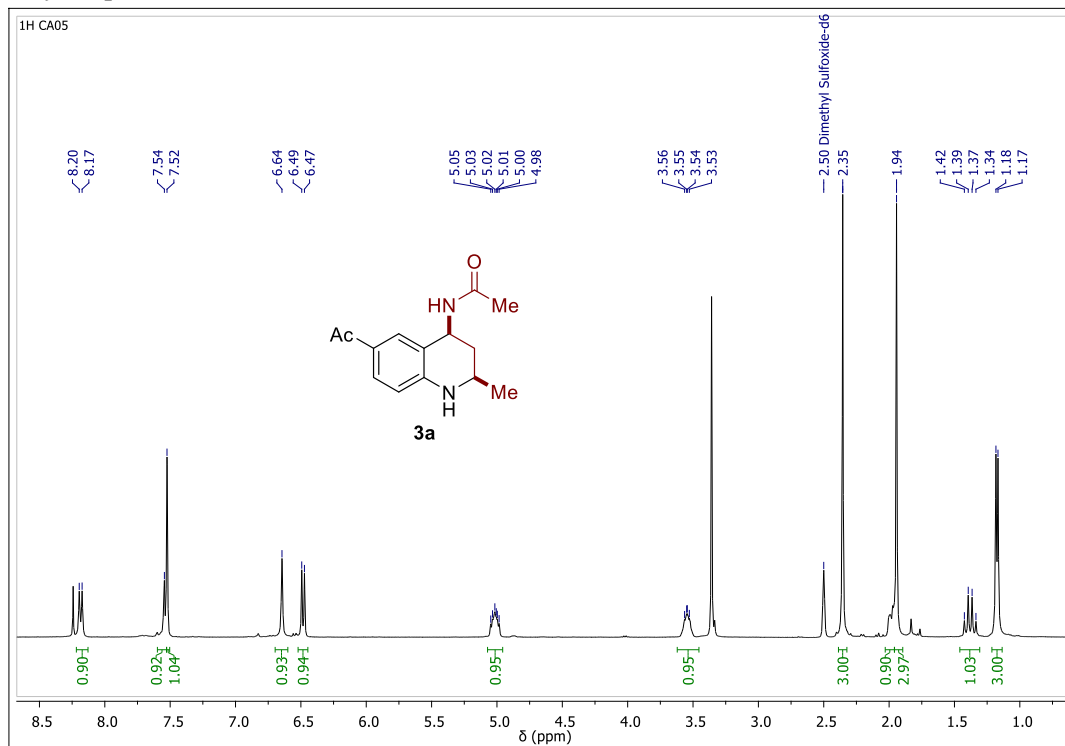

**Figure ESI 2.** <sup>13</sup>C-NMR spectrum of *cis*-4-Acetamido-6-acetyl-2-methyl-1,2,3,4-tetrahydroquinoline **3a**.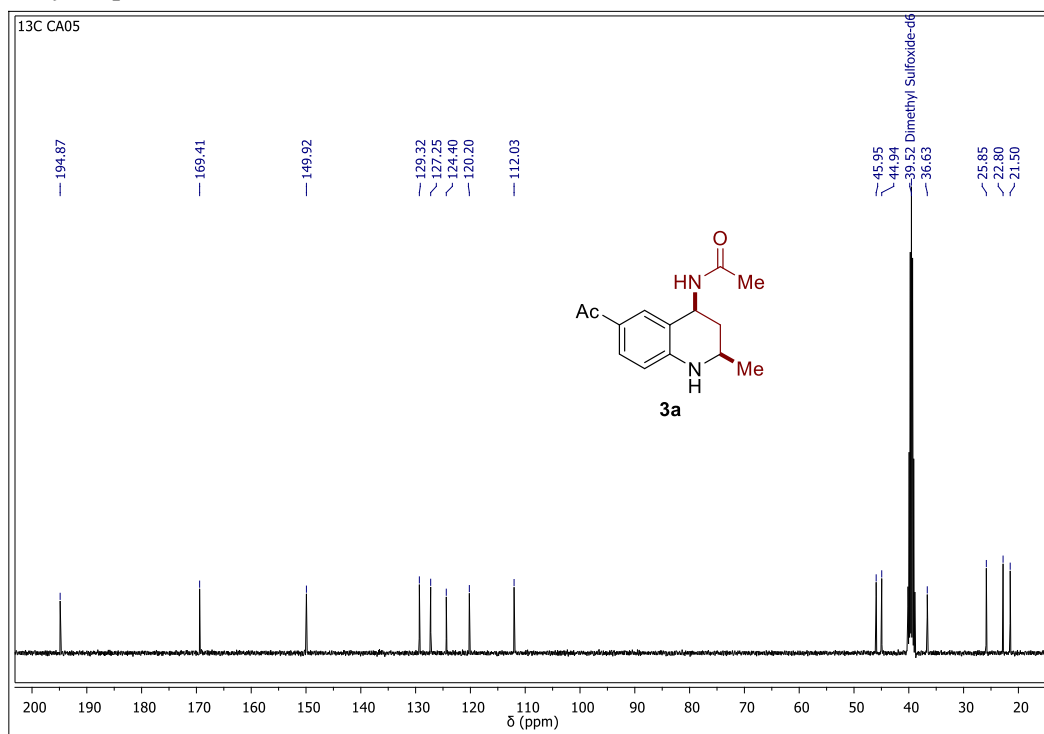**Figure ESI 3.** DEPT-135 spectrum of *cis*-4-Acetamido-6-acetyl-2-methyl-1,2,3,4-tetrahydroquinoline **3a**.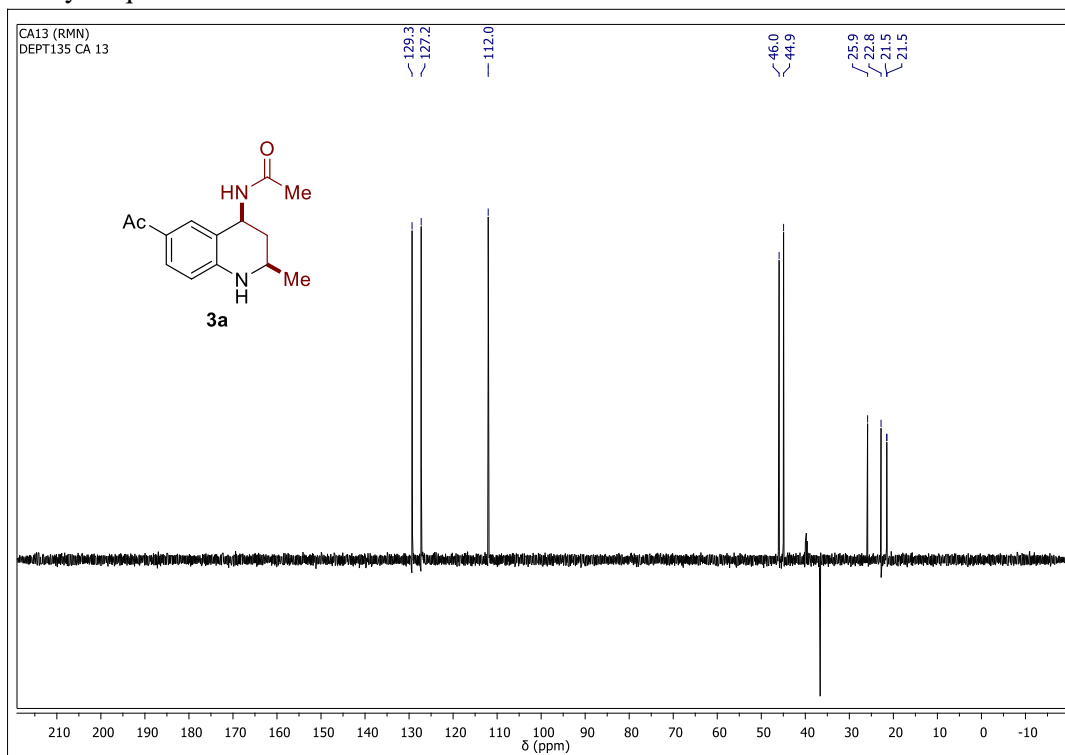

**Figure ESI 4.** COSY spectrum of *cis*-4-Acetamido-6-acetyl-2-methyl-1,2,3,4-tetrahydroquinoline **3a**.

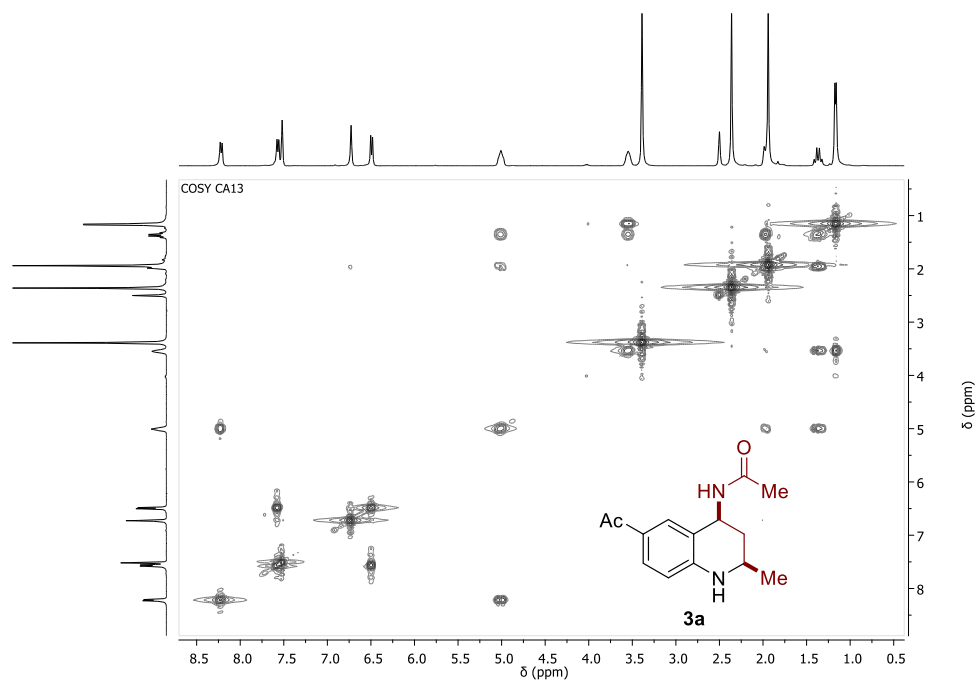

**Figure ESI 5.** HSQC spectrum of *cis*-4-Acetamido-6-acetyl-2-methyl-1,2,3,4-tetrahydroquinoline **3a**.

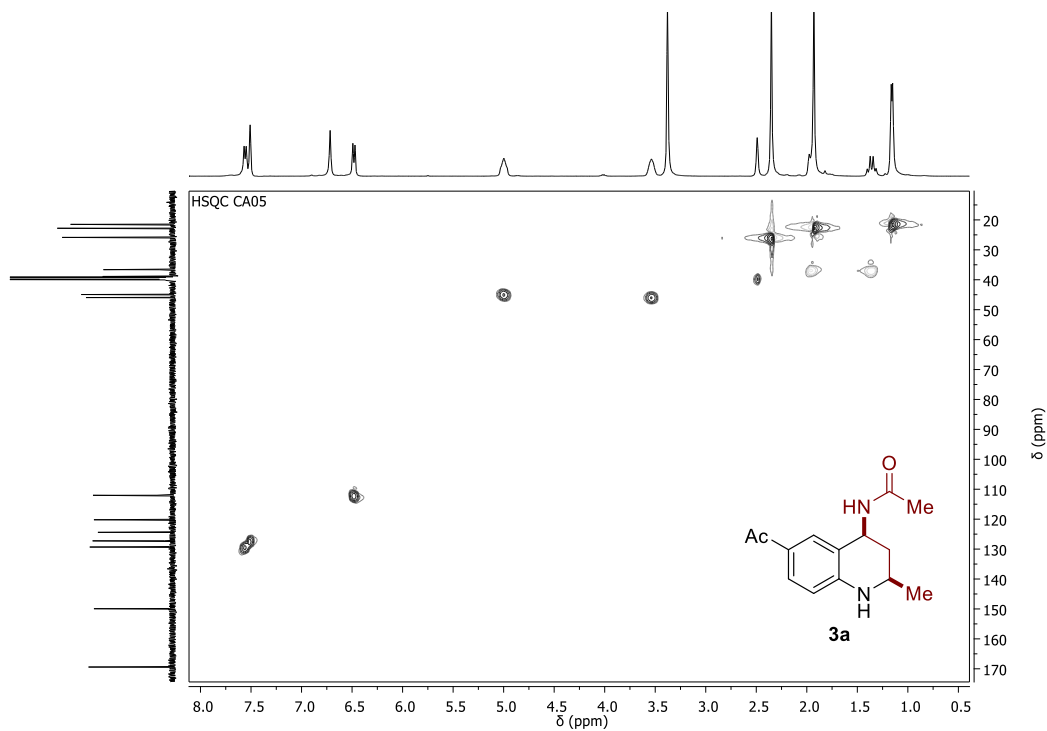

**Figure ESI 6.** HMBC spectrum of *cis*-4-Acetamido-6-acetyl-2-methyl-1,2,3,4-tetrahydroquinoline **3a**.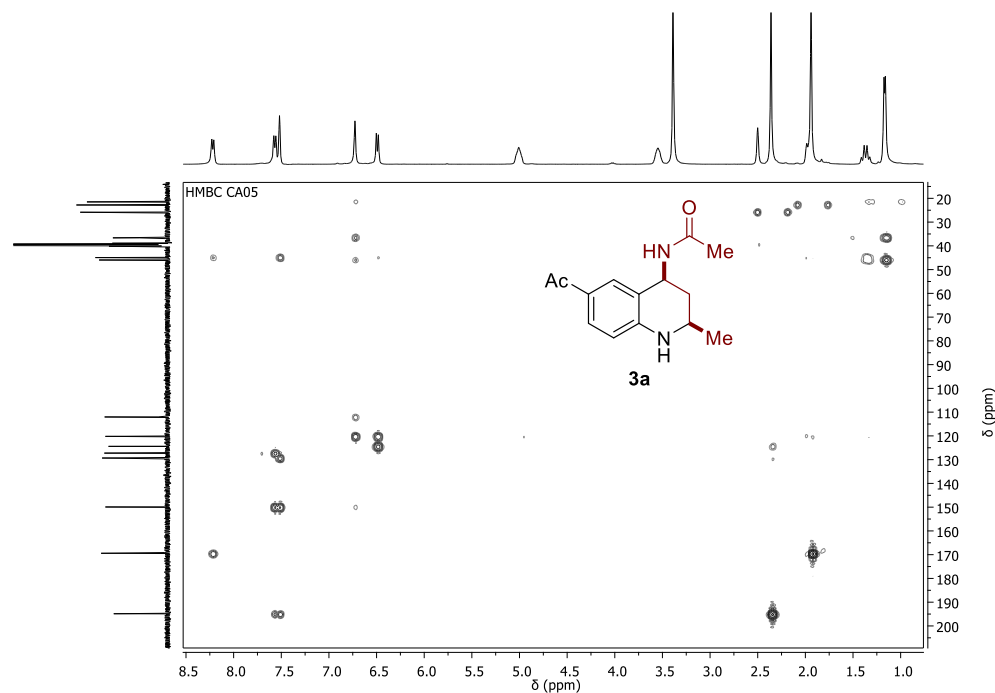**Figure ESI 7.** <sup>1</sup>H-NMR spectrum of *cis*-4-Acetamido-2-methyl-1,2,3,4-tetrahydroquinoline **3b**.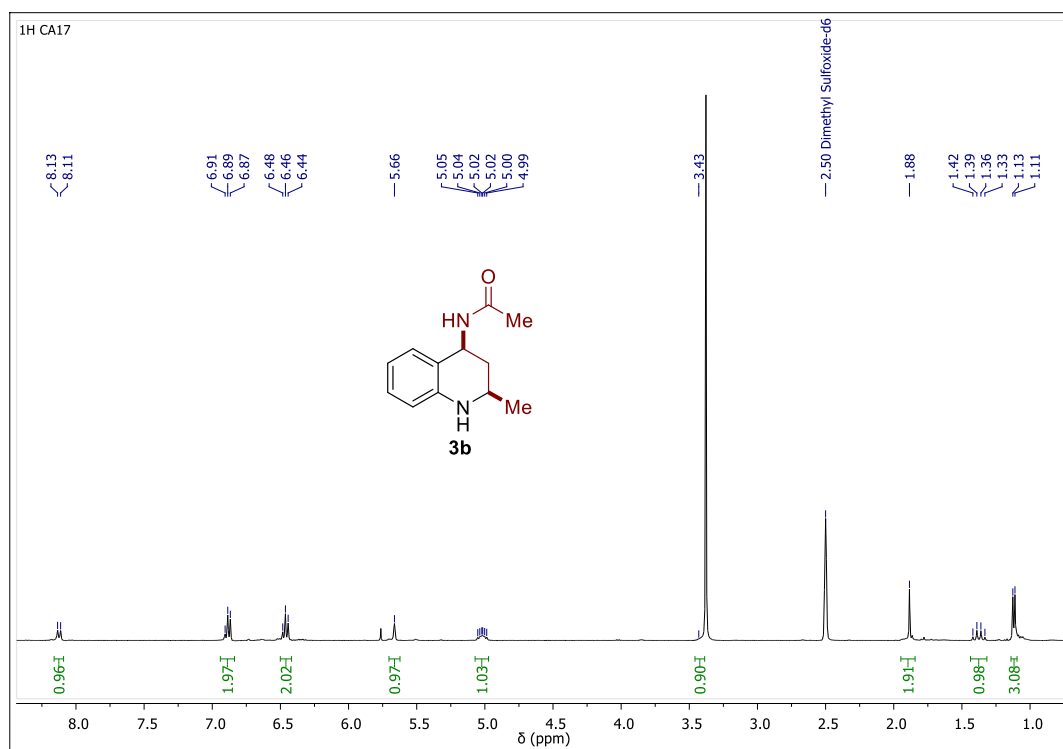

**Figure ESI 8.** <sup>13</sup>C-NMR spectrum of *cis*-4-Acetamido-2-methyl-1,2,3,4-tetrahydroquinoline **3b**.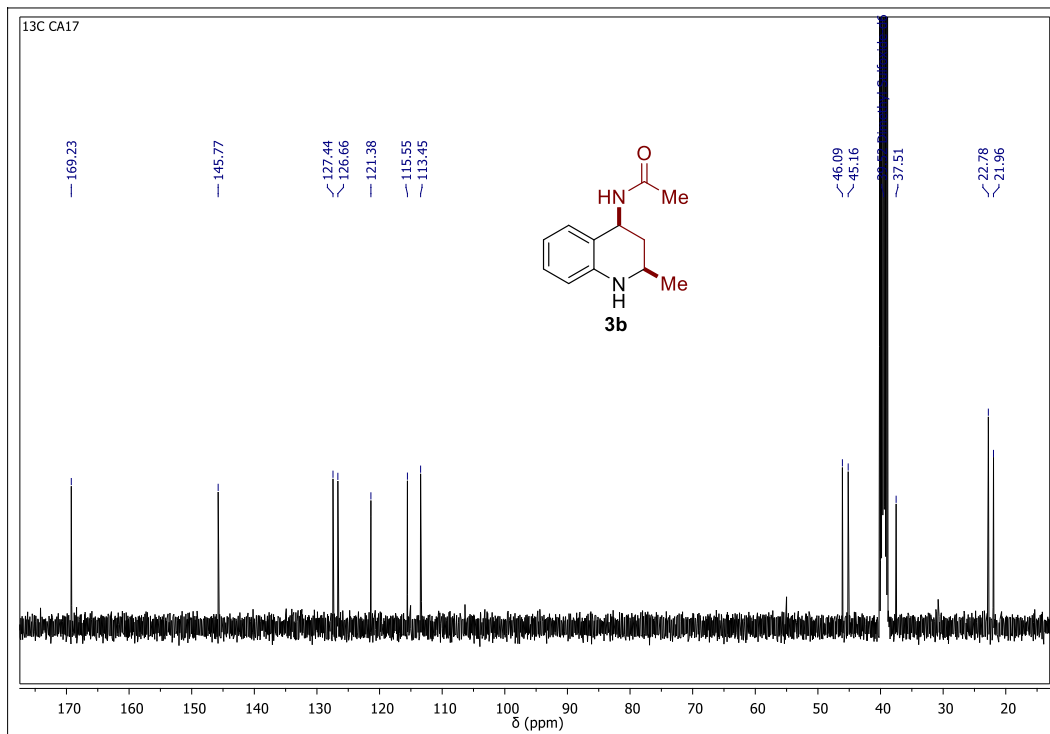**Figure ESI 9.** DEPT-135 spectrum of *cis*-4-Acetamido-2-methyl-1,2,3,4-tetrahydroquinoline **3b**.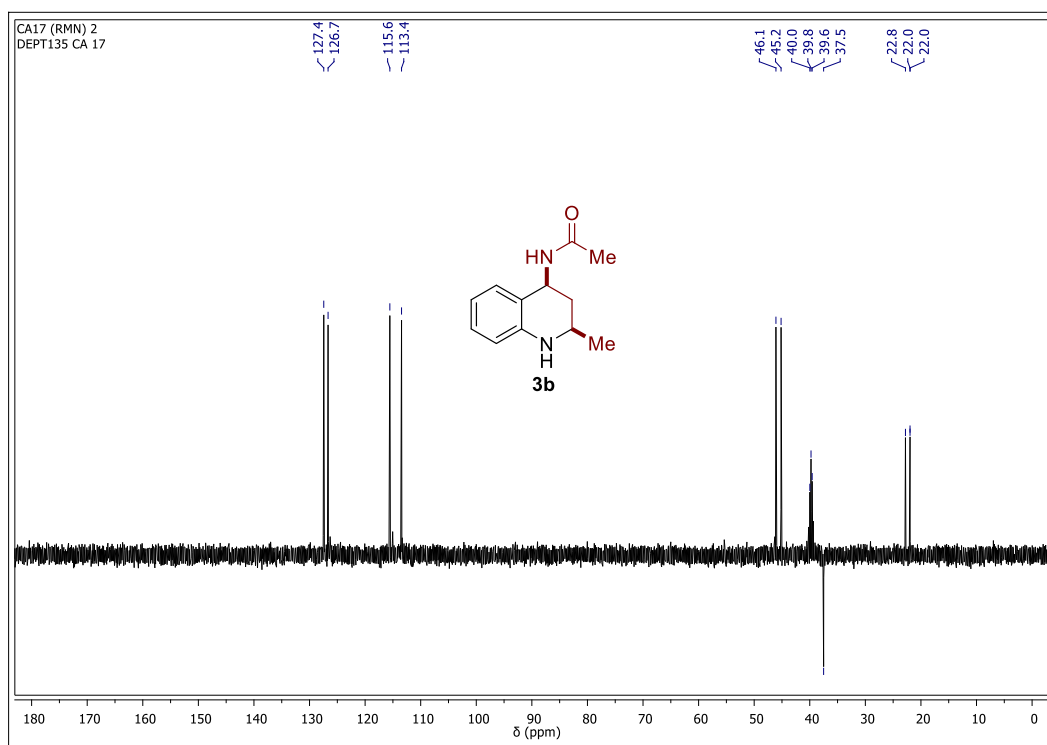

**Figure ESI 10.** COSY spectrum of *cis*-4-Acetamido-2-methyl-1,2,3,4-tetrahydroquinoline **3b**.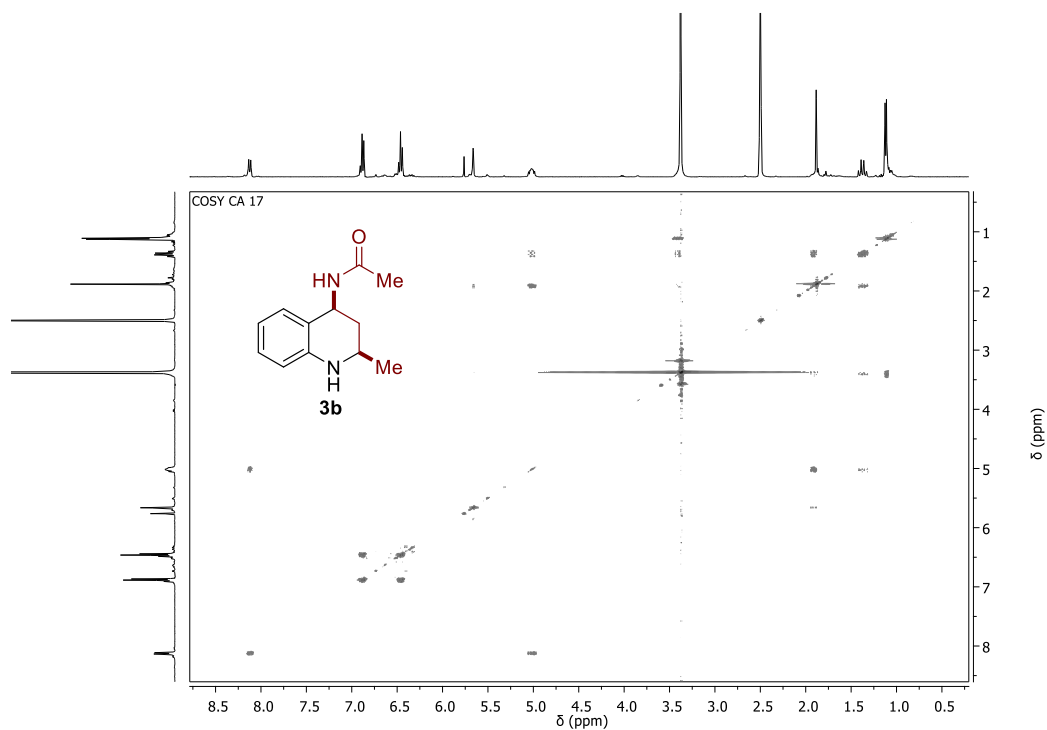**Figure ESI 11.** HSQC spectrum of *cis*-4-Acetamido-2-methyl-1,2,3,4-tetrahydroquinoline **3b**.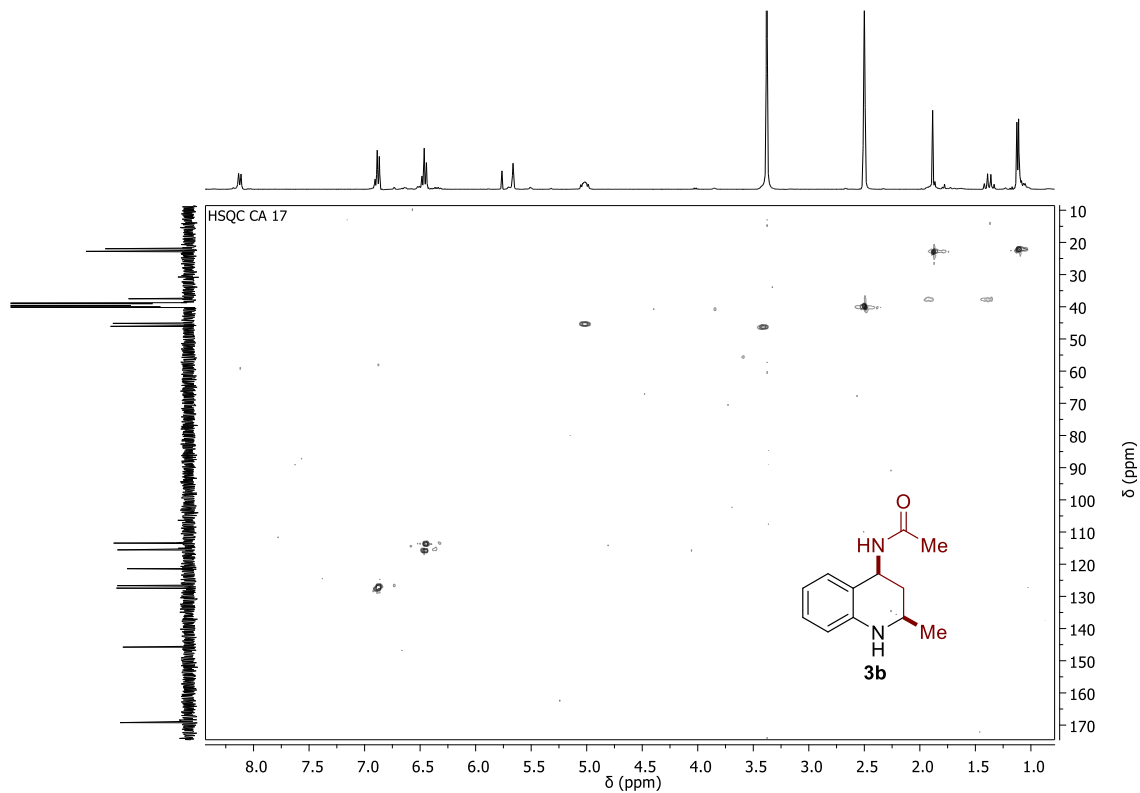

**Figure ESI 12.** HMBC spectrum of *cis*-4-Acetamido-2-methyl-1,2,3,4-tetrahydroquinoline **3b**.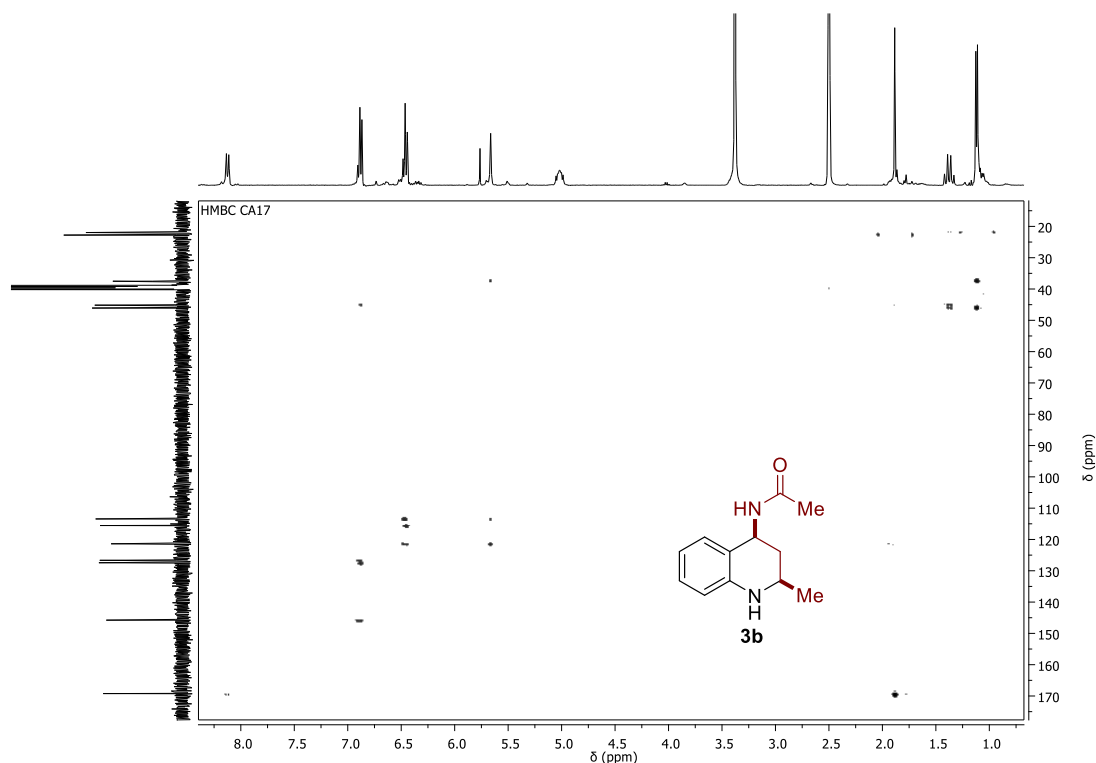**Figure ESI 13.** <sup>1</sup>H-NMR spectrum of *cis*-4-Acetamido-6-methoxy-2-methyl-1,2,3,4-tetrahydroquinoline **3c**.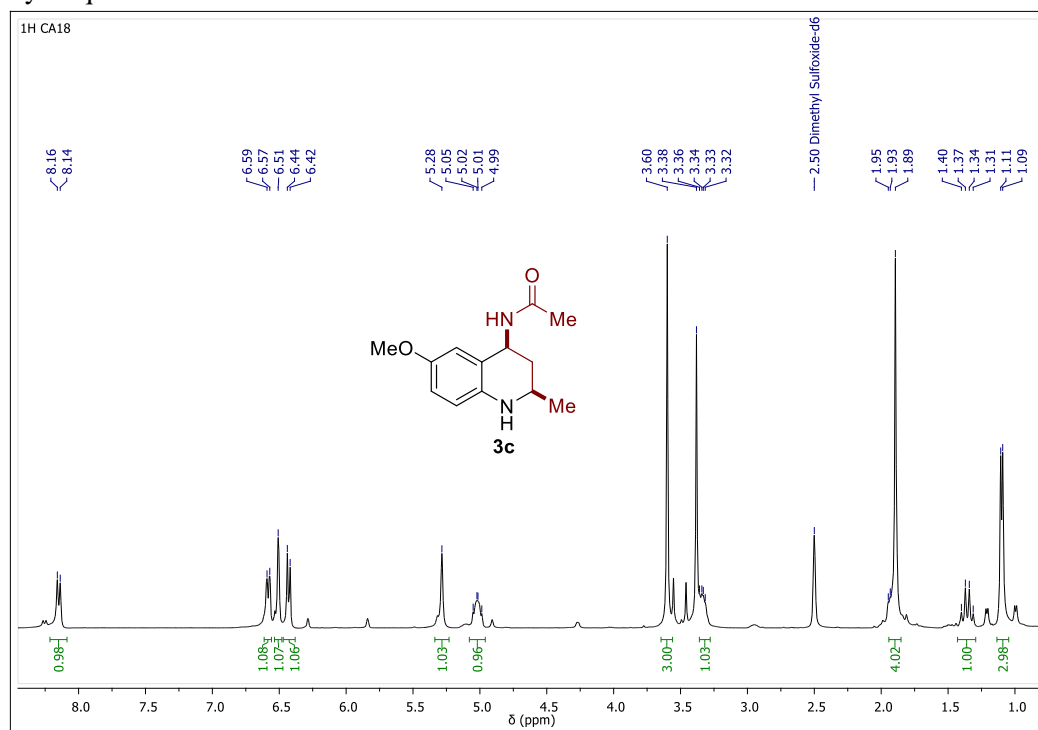



**Figure ESI 14.** <sup>13</sup>C-NMR spectrum of *cis*-4-Acetamido-6-methoxy-2-methyl-1,2,3,4-tetrahydroquinoline **3c**.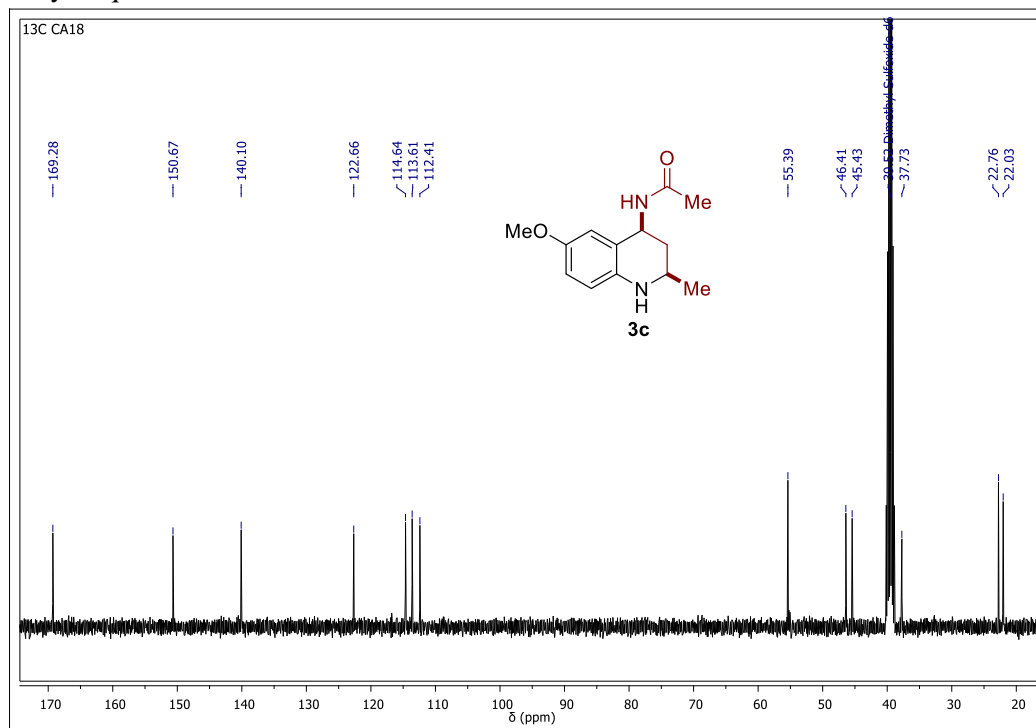**Figure ESI 15.** DEPT-135 spectrum of *cis*-4-Acetamido-6-methoxy-2-methyl-1,2,3,4-tetrahydroquinoline **3c**.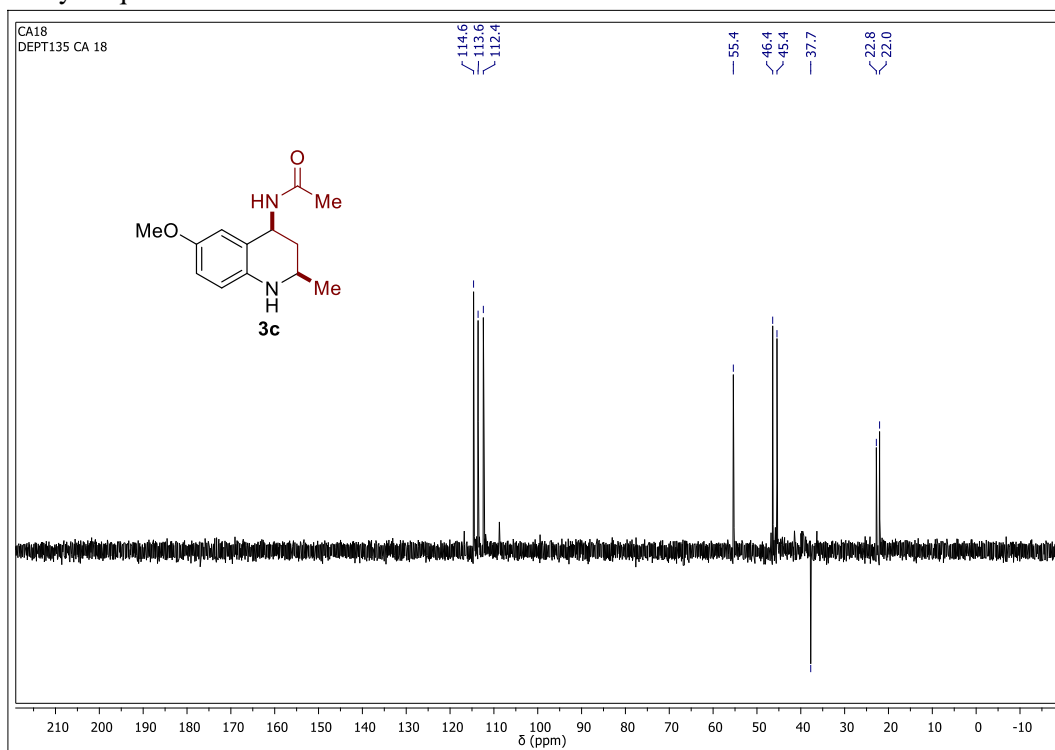

**Figure ESI 16.** <sup>1</sup>H-NMR spectrum of *cis*-4-Acetamido-6-carboxy-2-methyl-1,2,3,4-tetrahydroquinoline **3d**.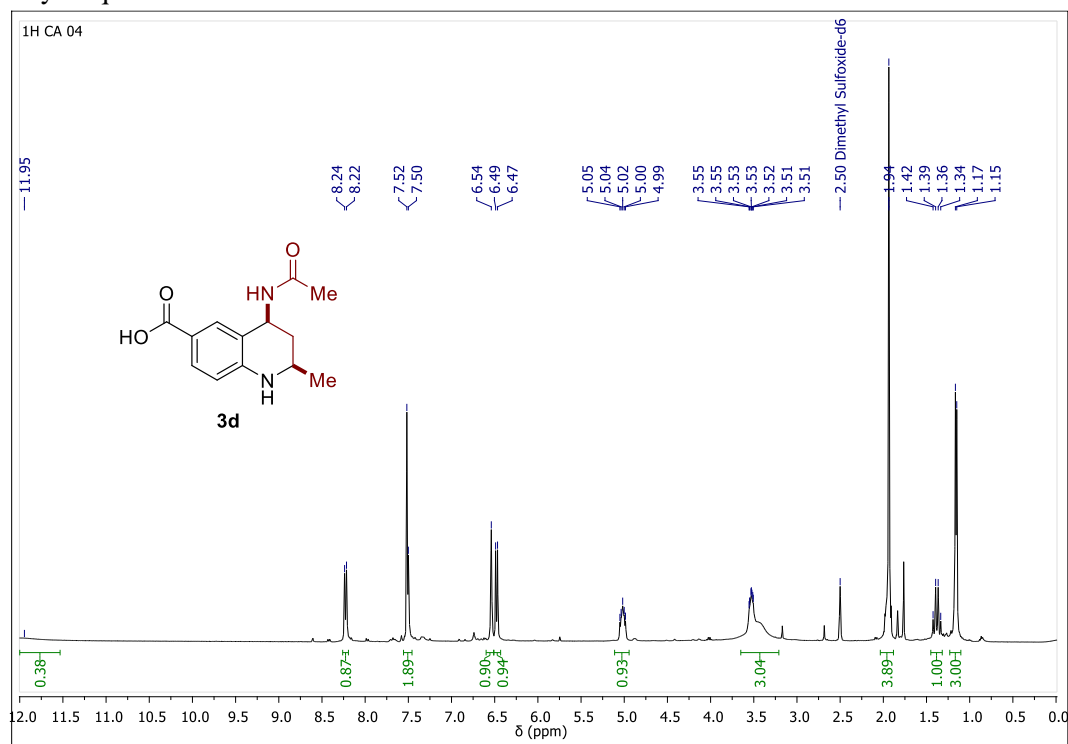**Figure ESI 17.** <sup>13</sup>C-NMR spectrum of *cis*-4-Acetamido-6-carboxy-2-methyl-1,2,3,4-tetrahydroquinoline **3d**.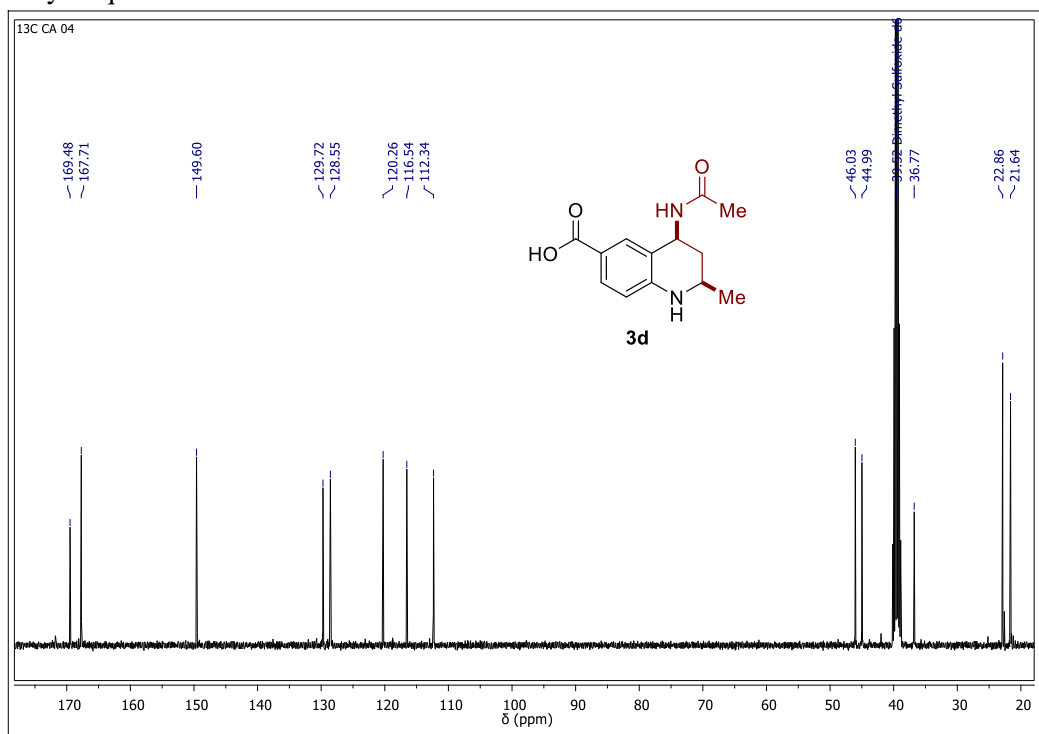

**Figure ESI 18.** DEPT-135 spectrum of *cis*-4-Acetamido-6-carboxy-2-methyl-1,2,3,4-tetrahydroquinoline **3d**.

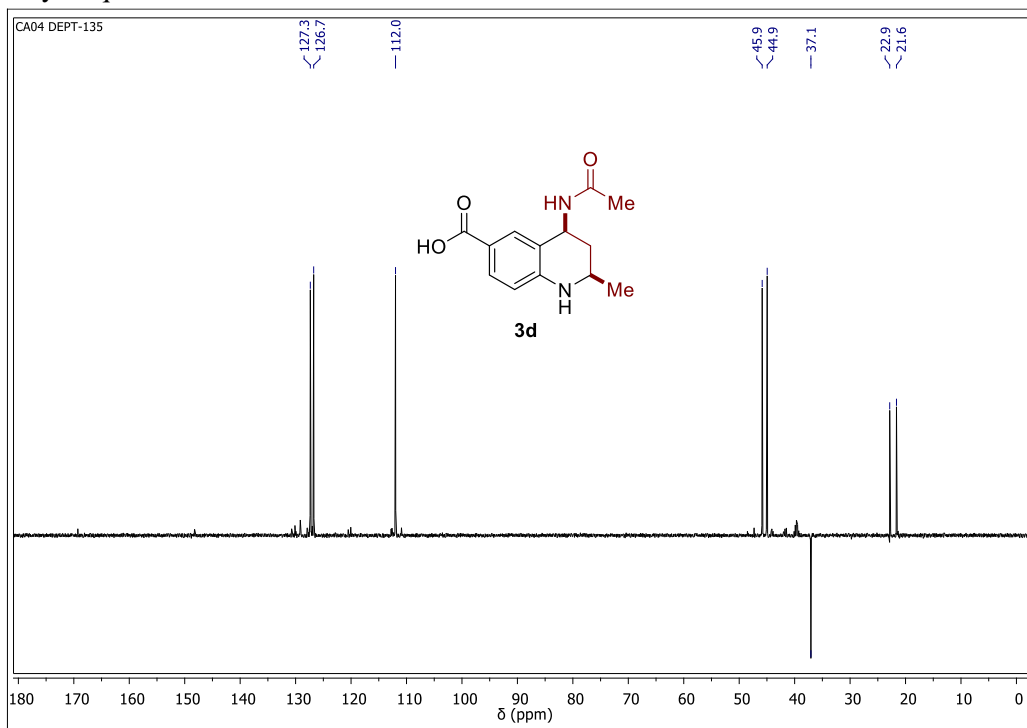

**Figure ESI 19.** COSY spectrum of *cis*-4-Acetamido-6-carboxy-2-methyl-1,2,3,4-tetrahydroquinoline **3d**.

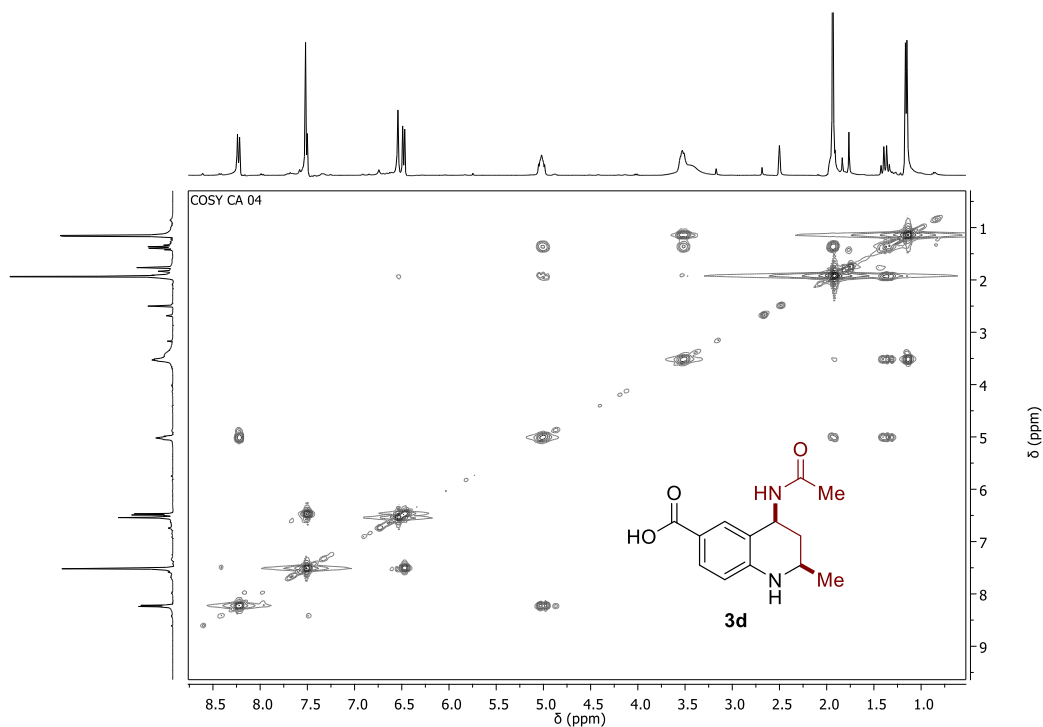

**Figure ESI 20.** HSQC spectrum of *cis*-4-Acetamido-6-carboxy-2-methyl-1,2,3,4-tetrahydroquinoline **3d**.

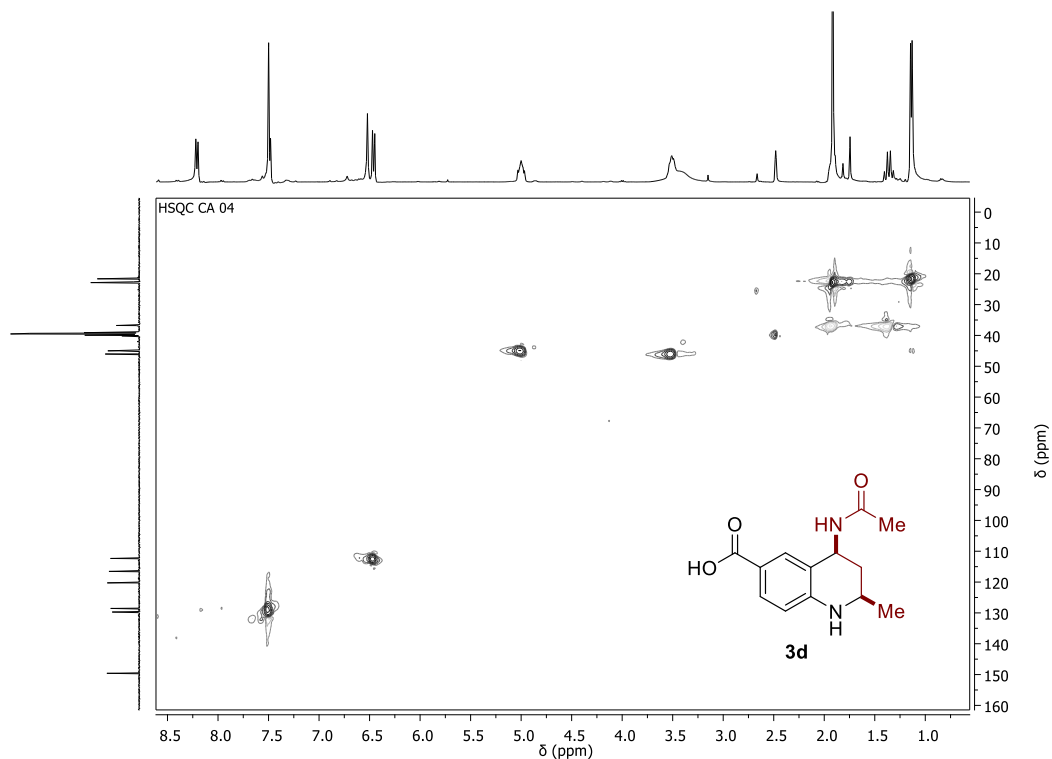

**Figure ESI 21.** HMBC spectrum of *cis*-4-Acetamido-6-carboxy-2-methyl-1,2,3,4-tetrahydroquinoline **3d**.

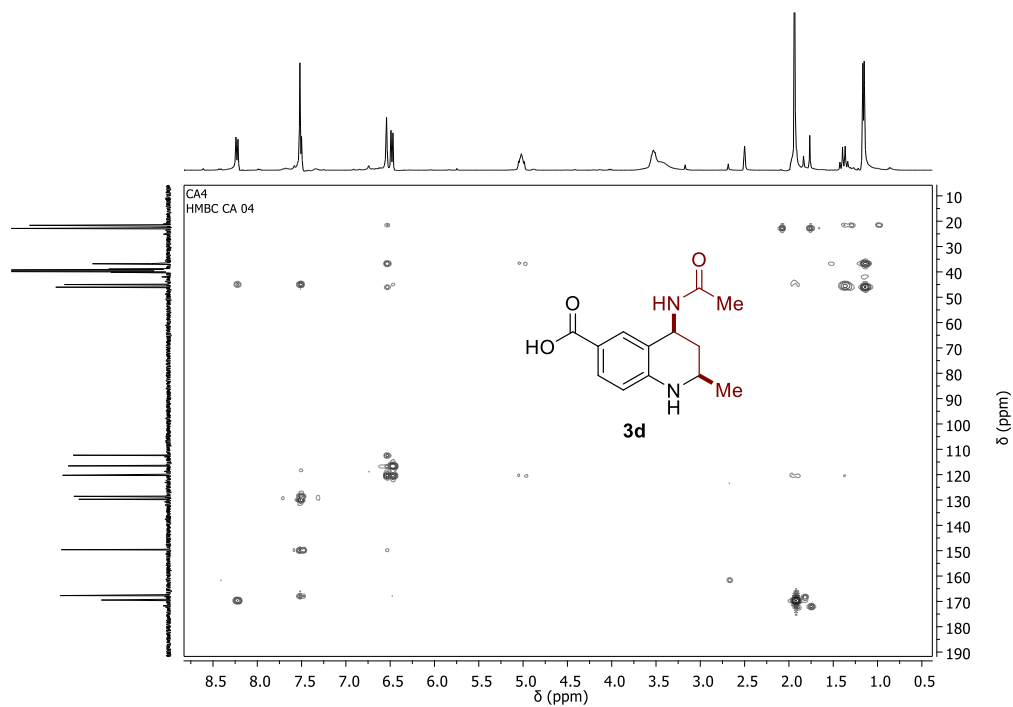

**Figure ESI 22.** <sup>1</sup>H-NMR spectrum of *cis*-6-Acetyl-4-formamido-2-methyl-1,2,3,4-tetrahydroquinoline **3e**.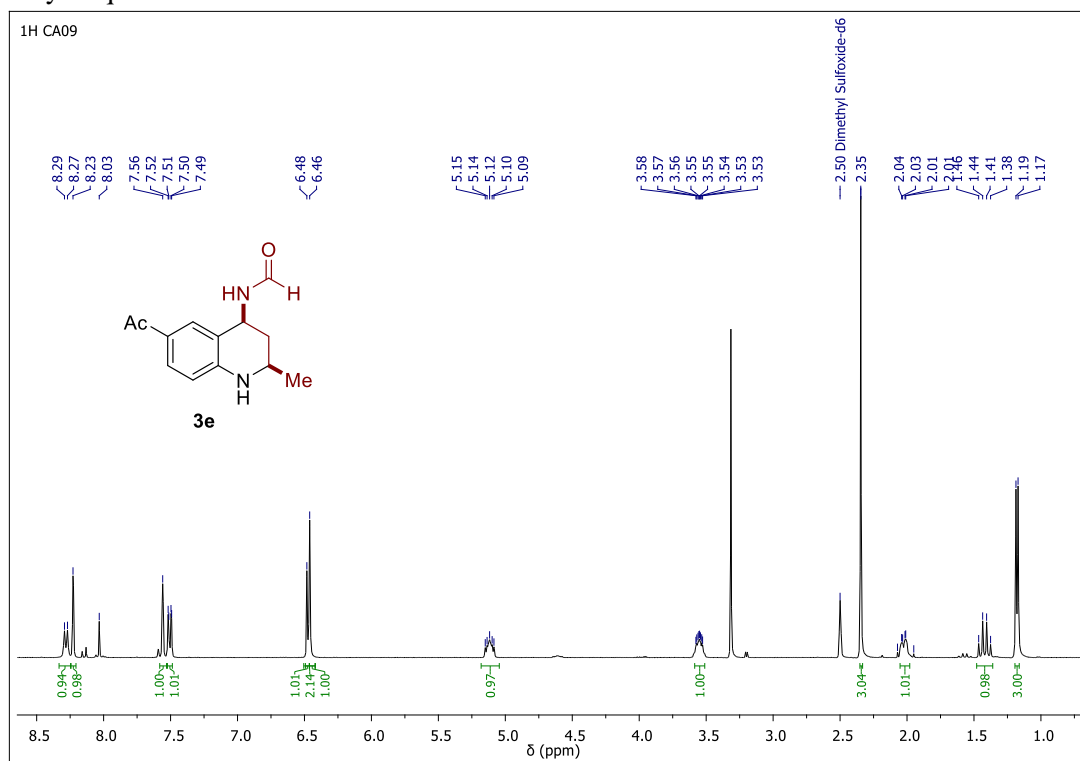**Figure ESI 23.** <sup>13</sup>C-NMR spectrum of *cis*-6-Acetyl-4-formamido-2-methyl-1,2,3,4-tetrahydroquinoline **3e**.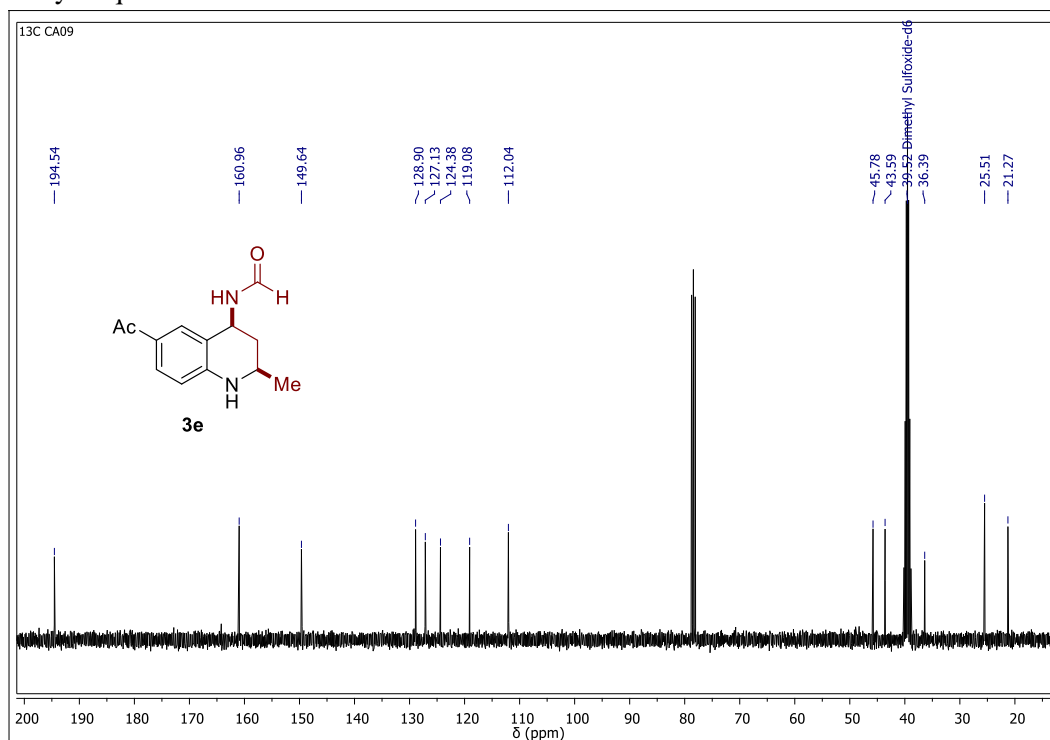

**Figure ESI 24.** DEPT-135 spectrum of *cis*-6-Acetyl-4-formamido-2-methyl-1,2,3,4-tetrahydroquinoline **3e**.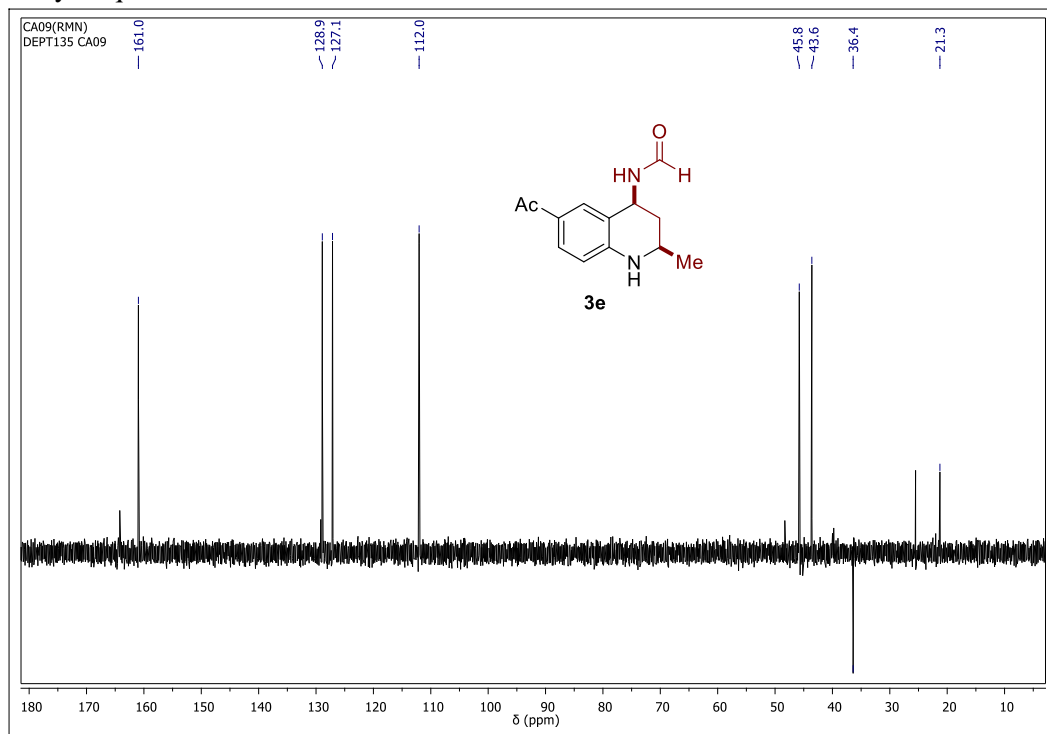**Figure ESI 25.** <sup>1</sup>H-NMR spectrum of *cis*-4-Formamido-2-methyl-1,2,3,4-tetrahydroquinoline **3f**.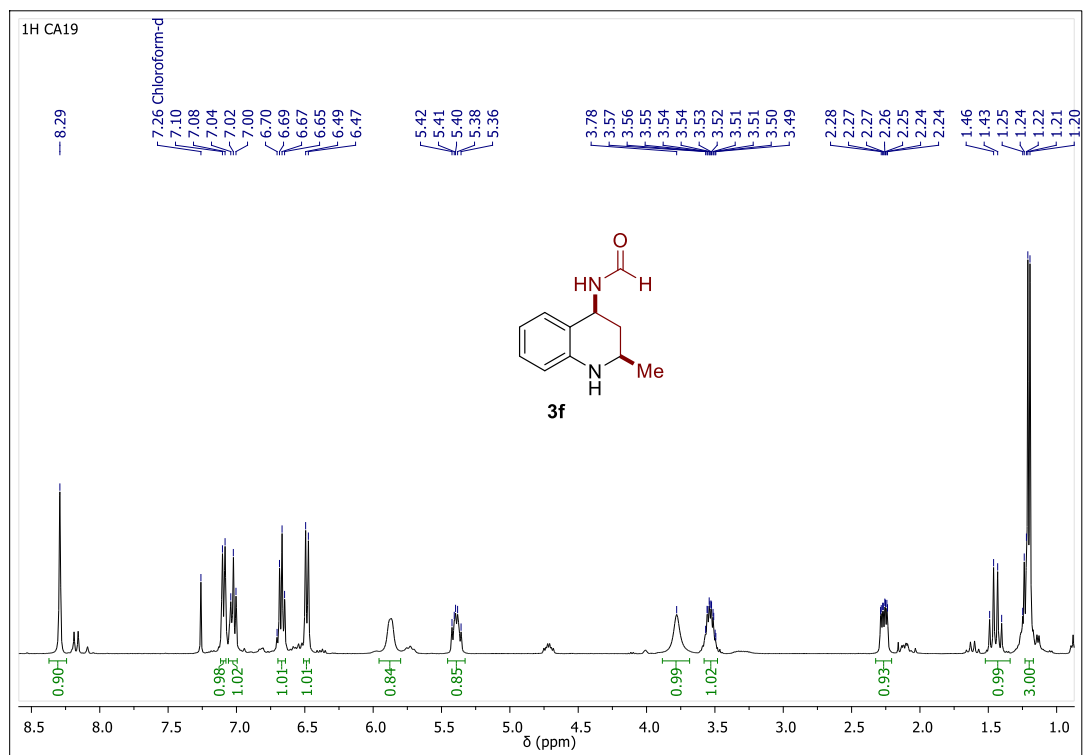

**Figure ESI 26.** <sup>13</sup>C-NMR spectrum of *cis*-4-Formamido-2-methyl-1,2,3,4-tetrahydroquinoline **3f**.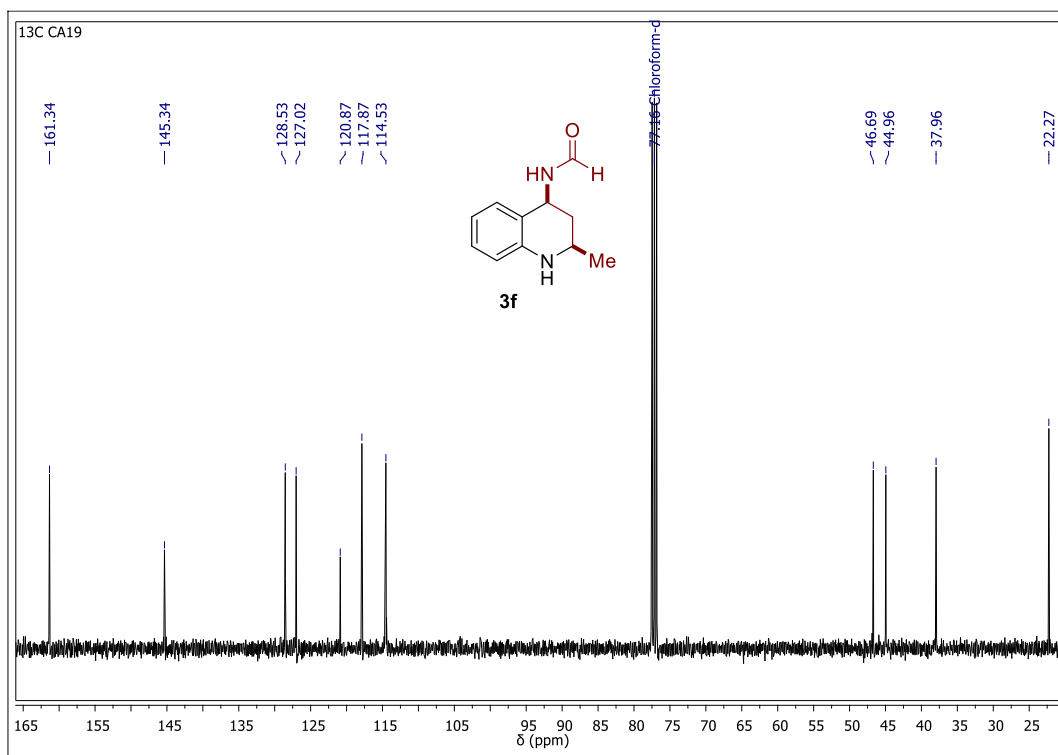**Figure ESI 27.** DEPT-135 spectrum of *cis*-4-Formamido-2-methyl-1,2,3,4-tetrahydroquinoline **3f**.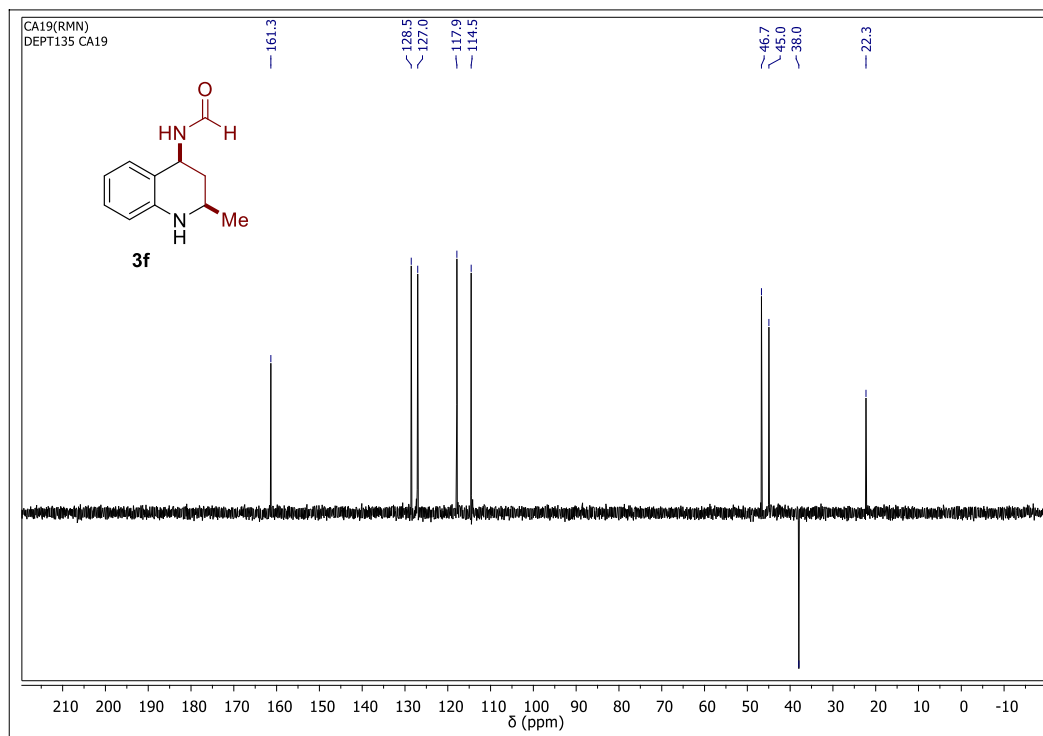

**Figure ESI 28.** <sup>1</sup>H-NMR spectrum of *cis*-4-Formamido-6-methoxy-2-methyl-1,2,3,4-tetrahydroquinoline **3g**.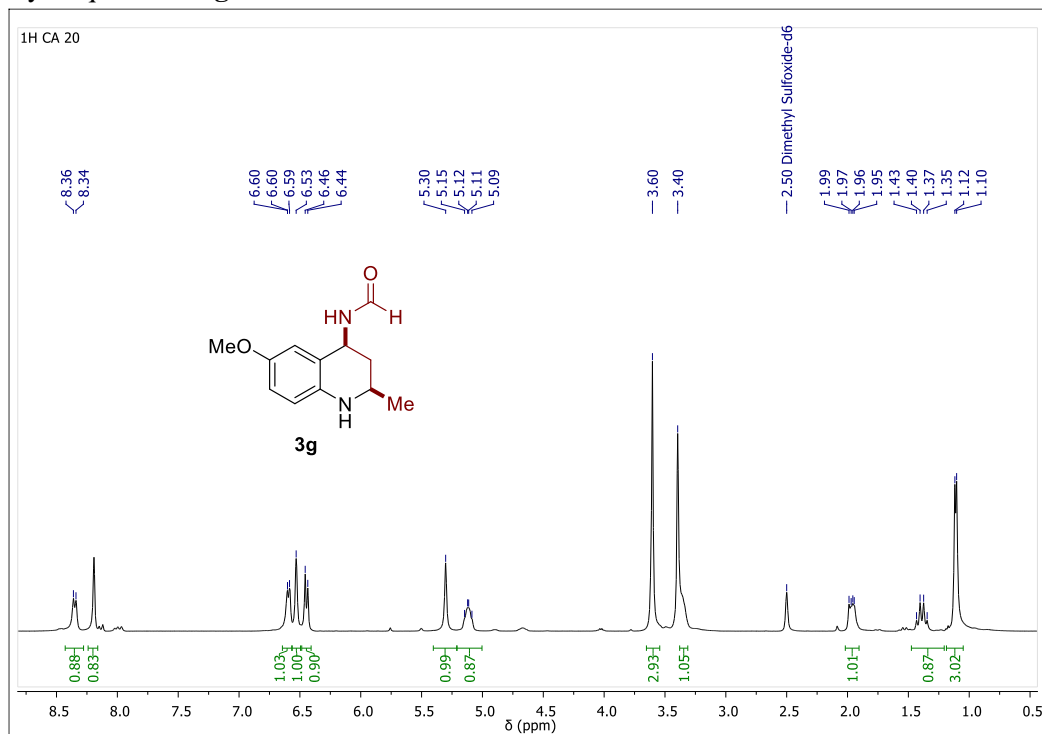**Figure ESI 29.** <sup>13</sup>C-NMR spectrum of *cis*-4-Formamido-6-methoxy-2-methyl-1,2,3,4-tetrahydroquinoline **3g**.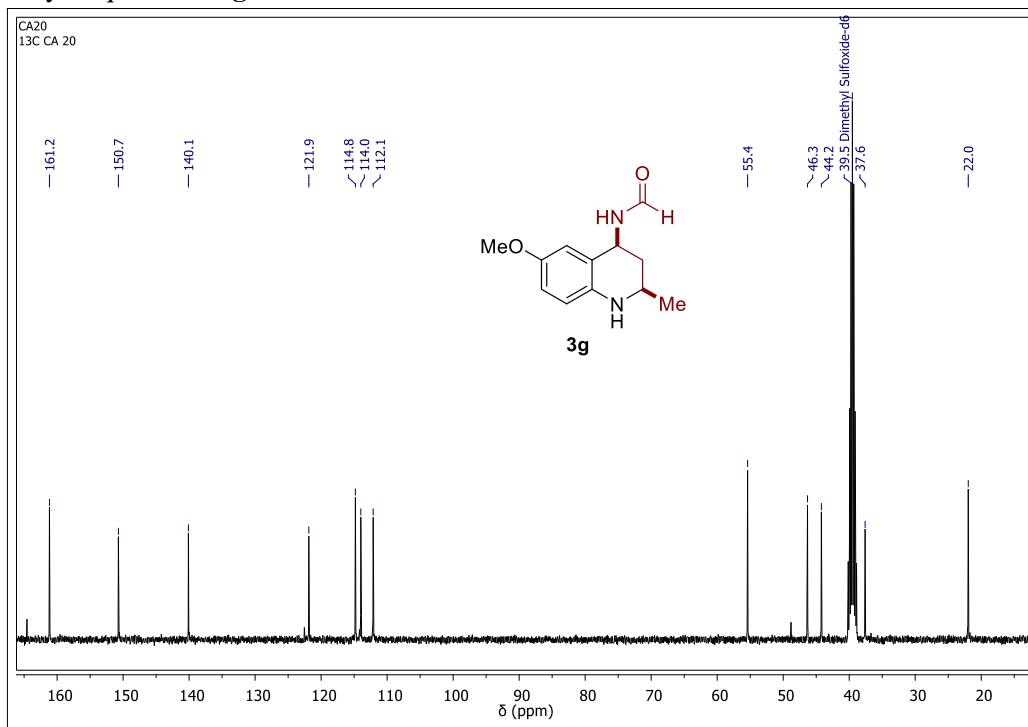



**Figure ESI 30.** DEPT-135 spectrum of *cis*-4-Formamido-6-methoxy-2-methyl-1,2,3,4-tetrahydroquinoline **3g**.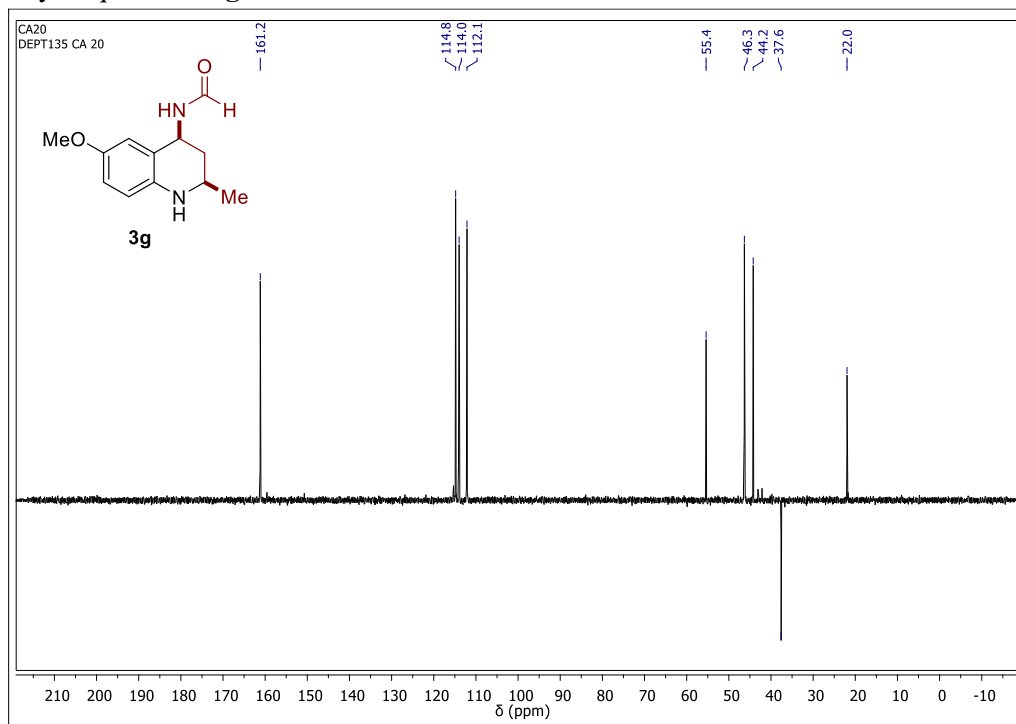**Figure ESI 31.** COSY spectrum of *cis*-4-Formamido-6-methoxy-2-methyl-1,2,3,4-tetrahydroquinoline **3g**.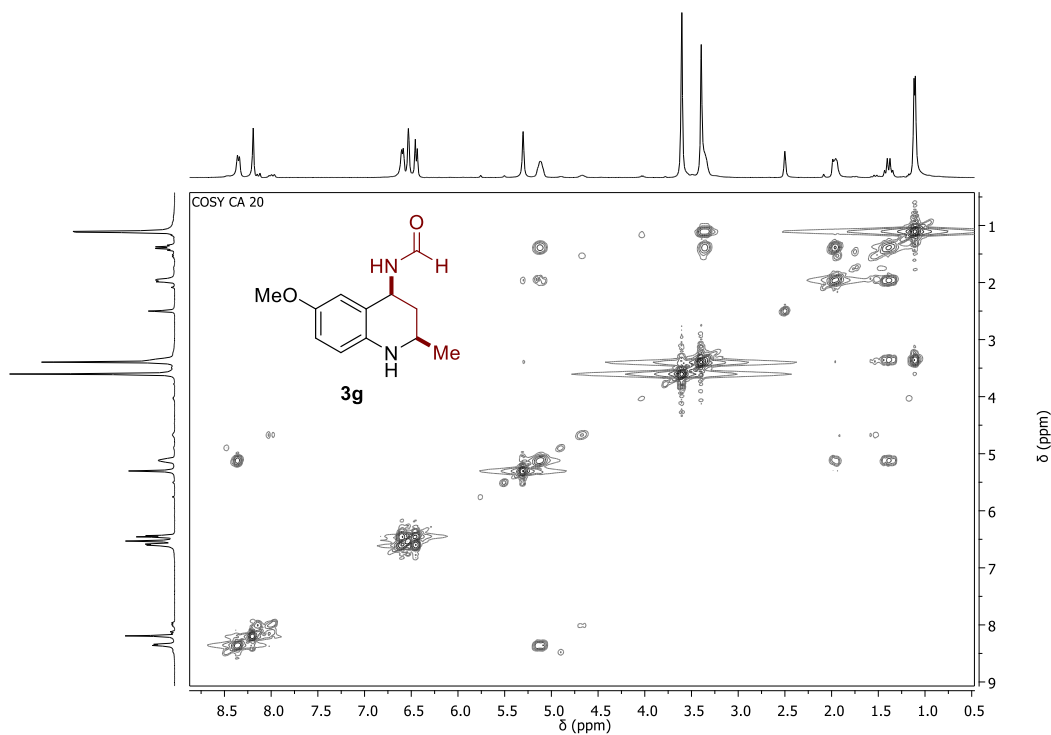

**Figure ESI 32.** HSQC spectrum of *cis*-4-Formamido-6-methoxy-2-methyl-1,2,3,4-tetrahydroquinoline **3g**.

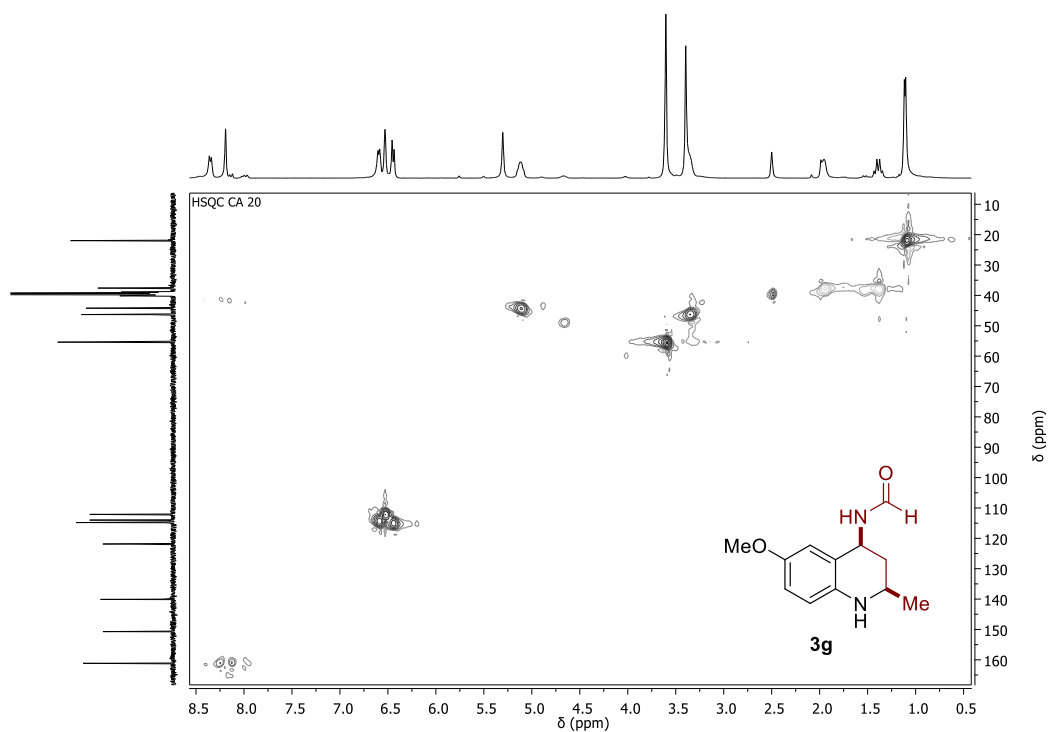

**Figure ESI 33.** HMBC spectrum of *cis*-4-Formamido-6-methoxy-2-methyl-1,2,3,4-tetrahydroquinoline **3g**.

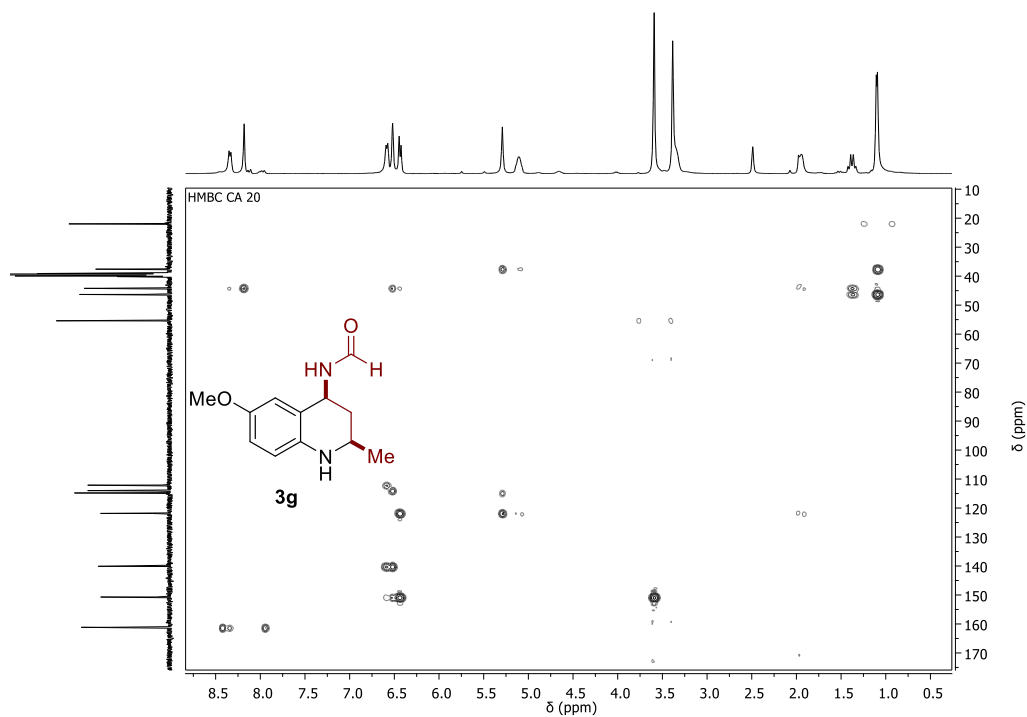

**Figure ESI 34.** <sup>1</sup>H-NMR spectrum of *cis*-6-Carboxy-4-formamido-2-methyl-1,2,3,4-tetrahydroquinoline **3h**.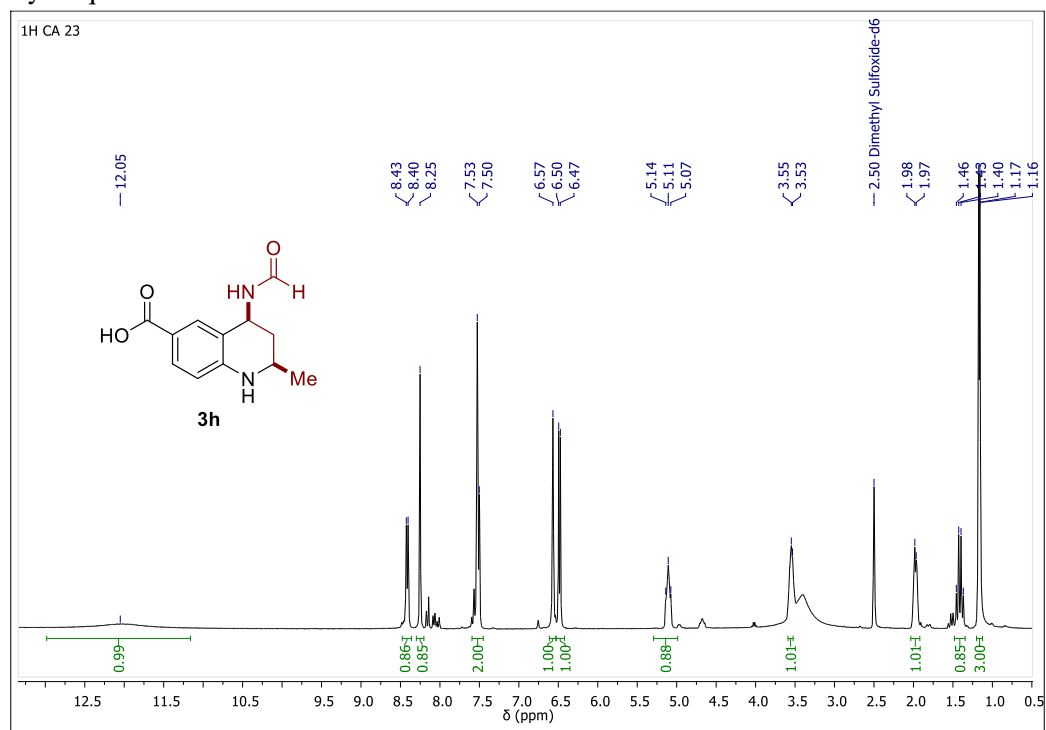**Figure ESI 35.** <sup>13</sup>C-NMR spectrum of *cis*-6-Carboxy-4-formamido-2-methyl-1,2,3,4-tetrahydroquinoline **3h**.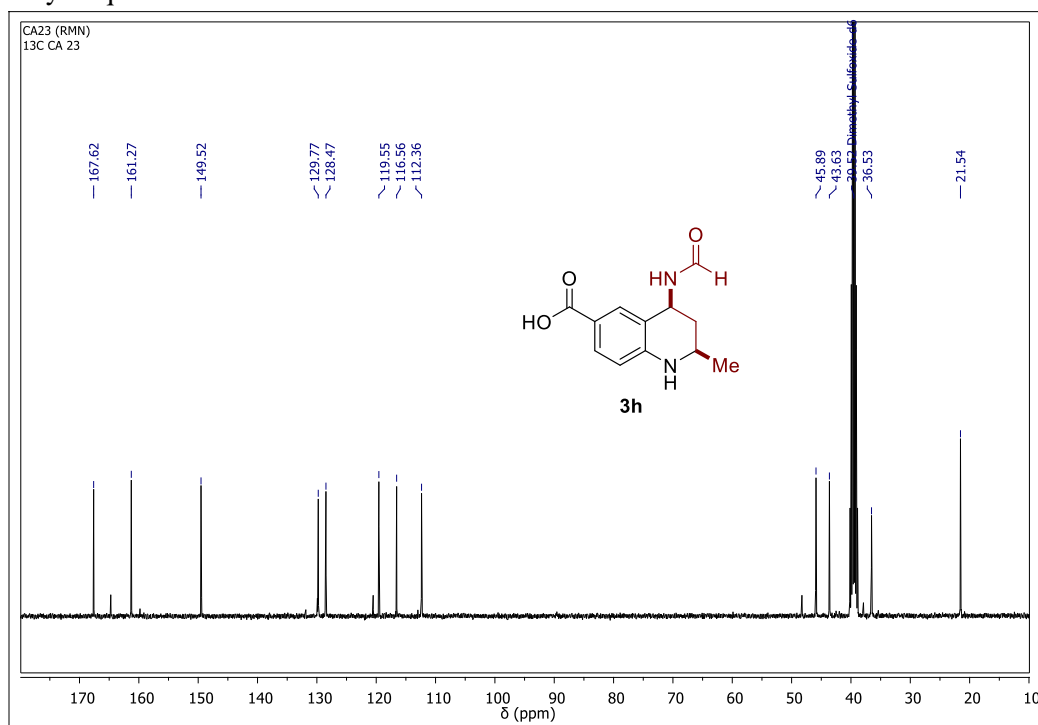

**Figure ESI 36.** DEPT-135 spectrum of *cis*-6-Carboxy-4-formamido-2-methyl-1,2,3,4-tetrahydroquinoline **3h**.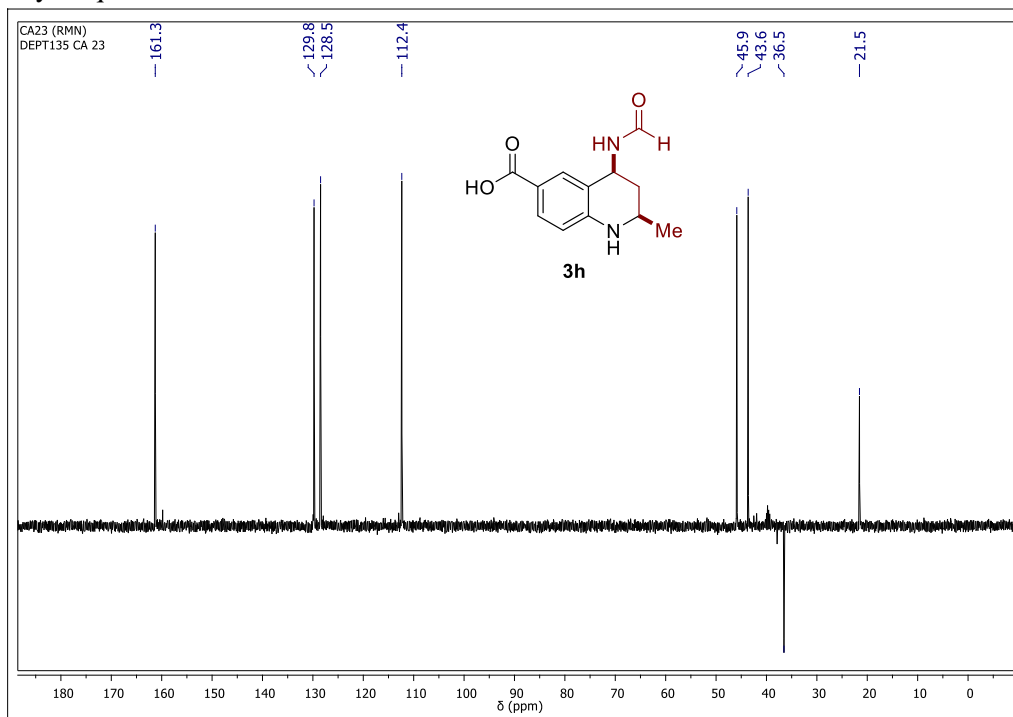**Figure ESI 37.** COSY spectrum of *cis*-6-Carboxy-4-formamido-2-methyl-1,2,3,4-tetrahydroquinoline **3h**.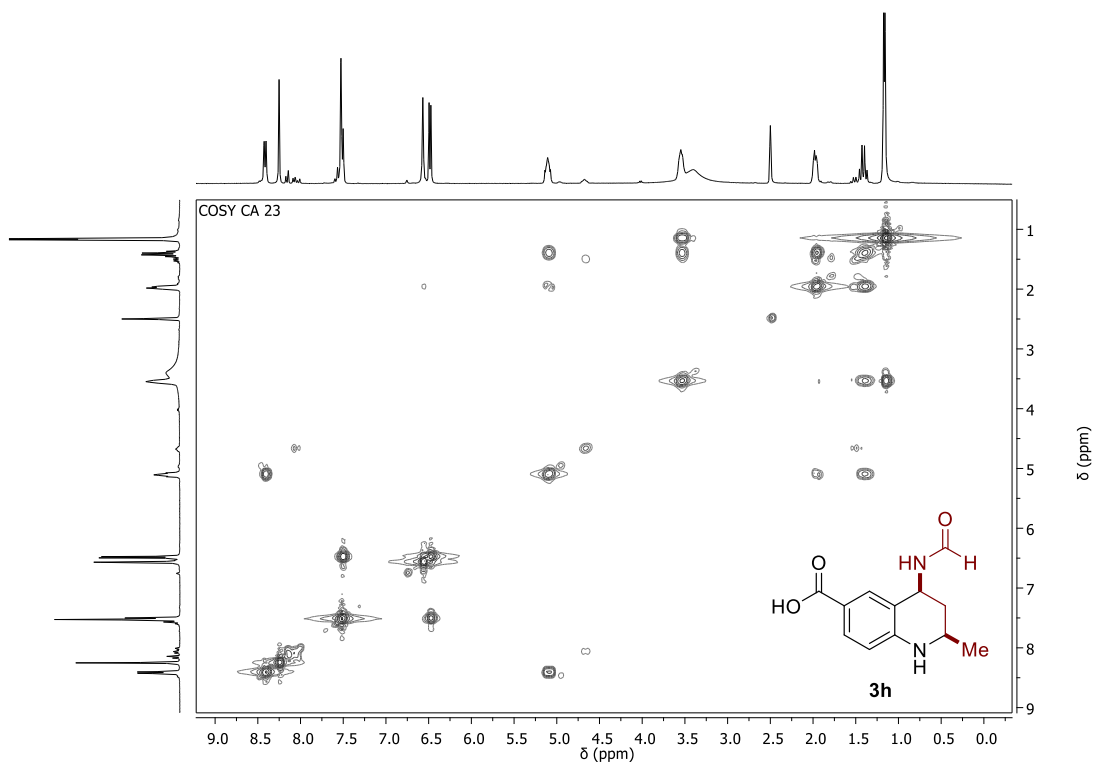

**Figure ESI 38.** HSQC spectrum of *cis*-6-Carboxy-4-formamido-2-methyl-1,2,3,4-tetrahydroquinoline **3h**.

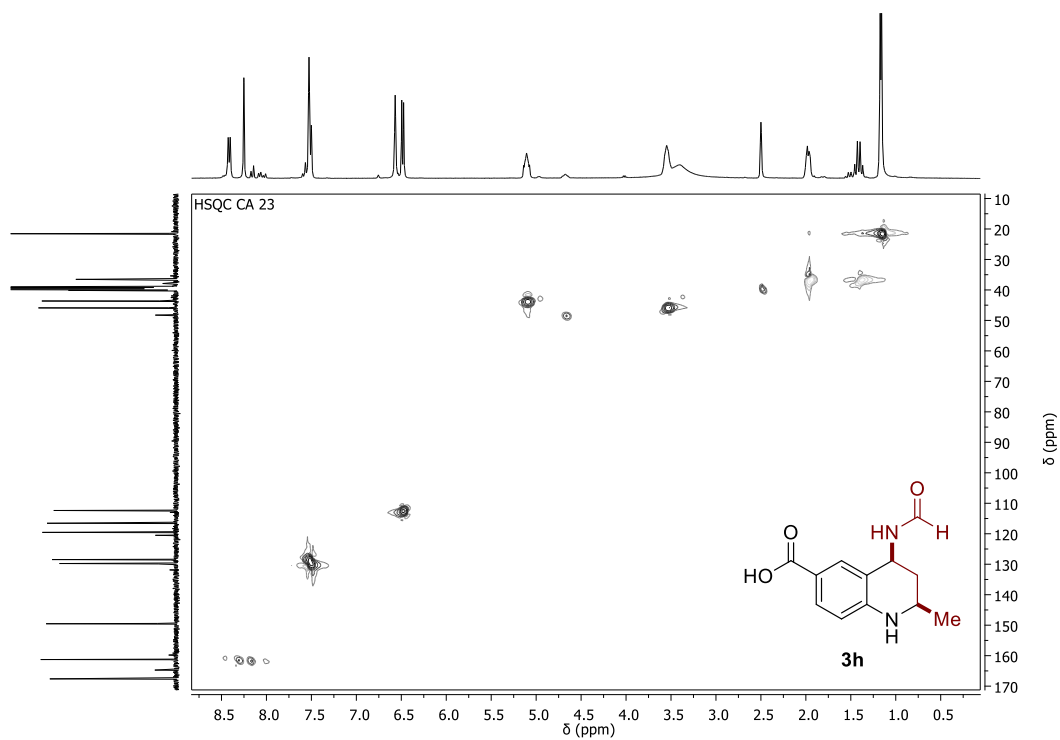

**Figure ESI 39.** HMBC spectrum of *cis*-6-Carboxy-4-formamido-2-methyl-1,2,3,4-tetrahydroquinoline **3h**.

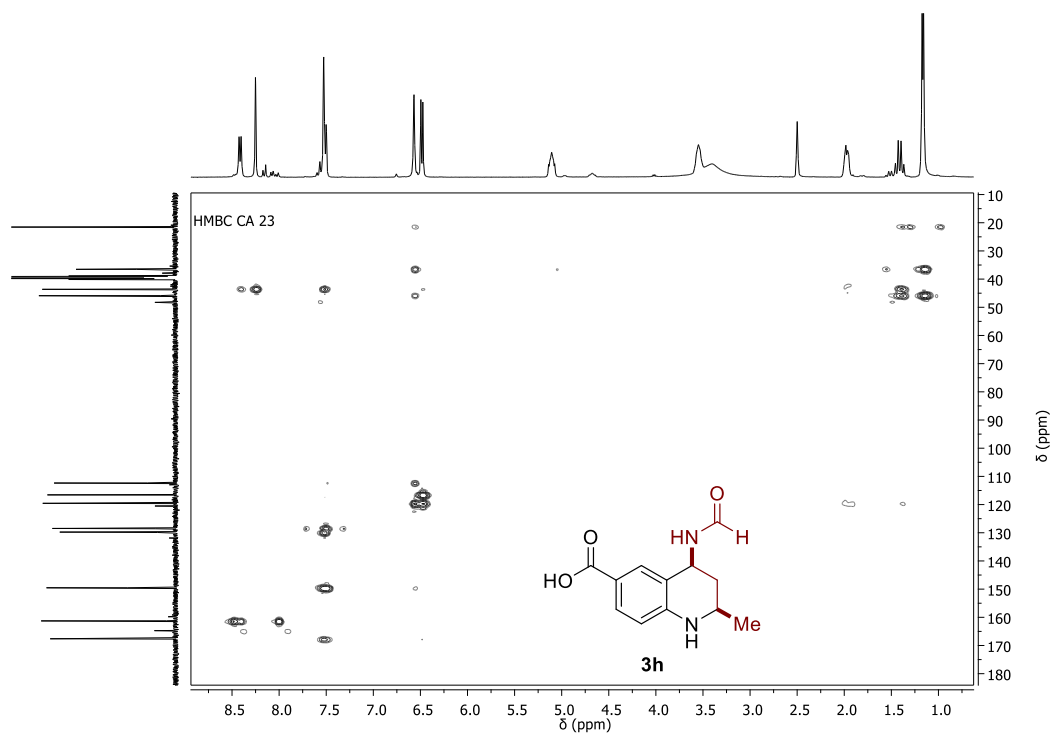

**Figure ESI 40.** <sup>1</sup>H-NMR spectrum of *cis*-6-Acetyl-4-(pyrrolidinyl-2-one)-2-methyl-1,2,3,4-tetrahydroquinoline **3i**.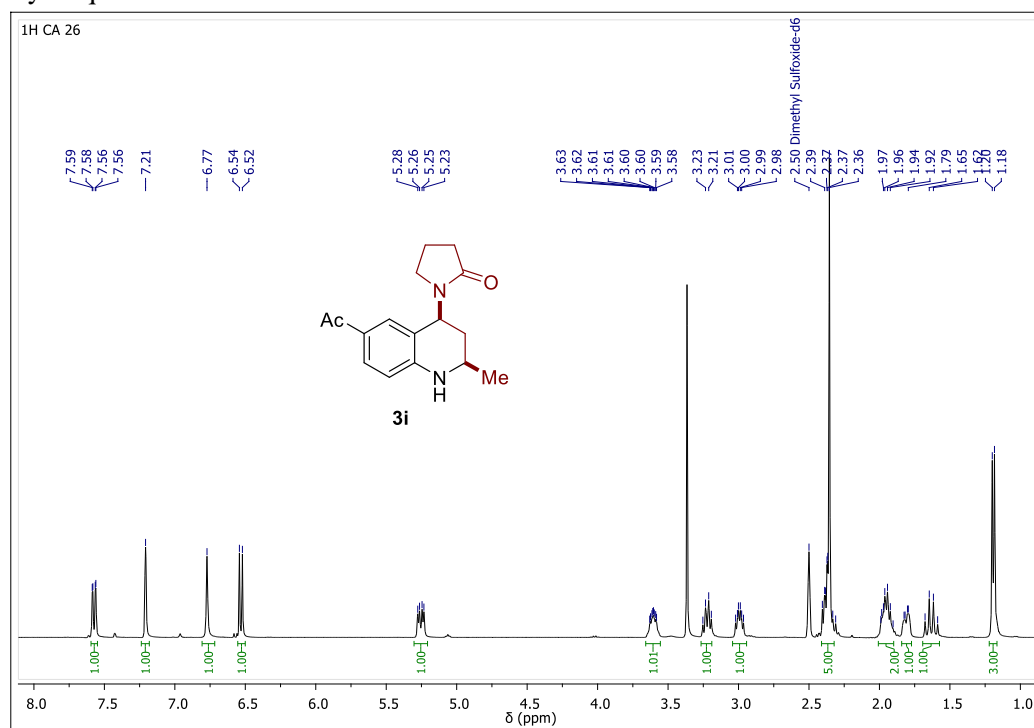**Figure ESI 41.** <sup>13</sup>C-NMR spectrum of *cis*-6-Acetyl-4-(pyrrolidinyl-2-one)-2-methyl-1,2,3,4-tetrahydroquinoline **3i**.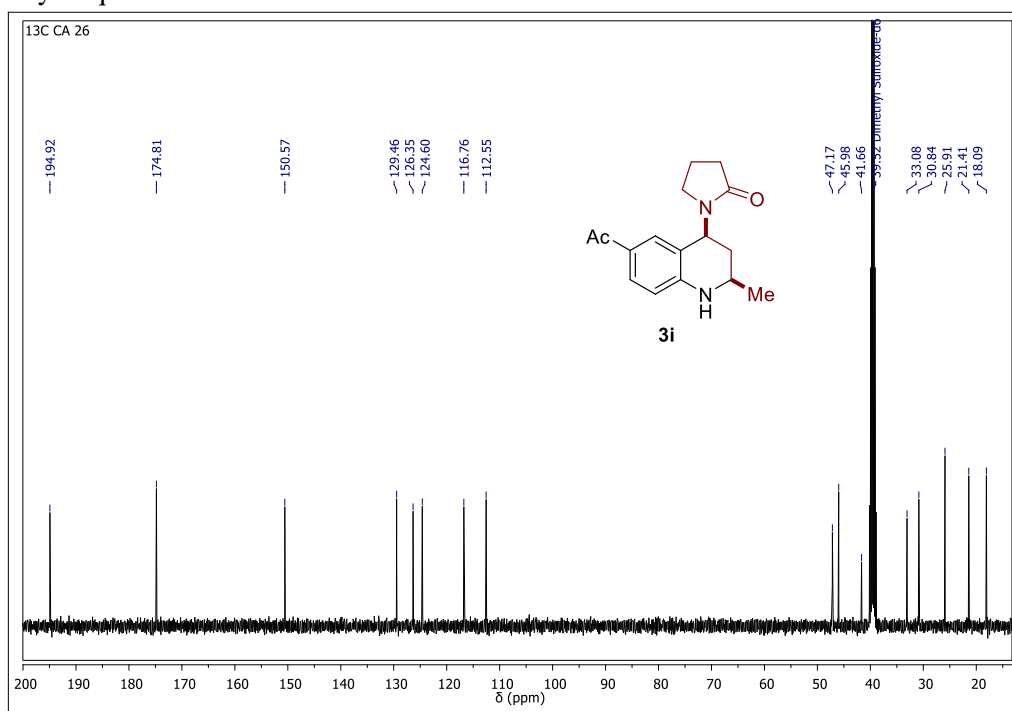

**Figure ESI 42.** DEPT-135 spectrum of *cis*-6-Acetyl-4-(pyrrolidinyl-2-one)-2-methyl-1,2,3,4-tetrahydroquinoline **3i**.

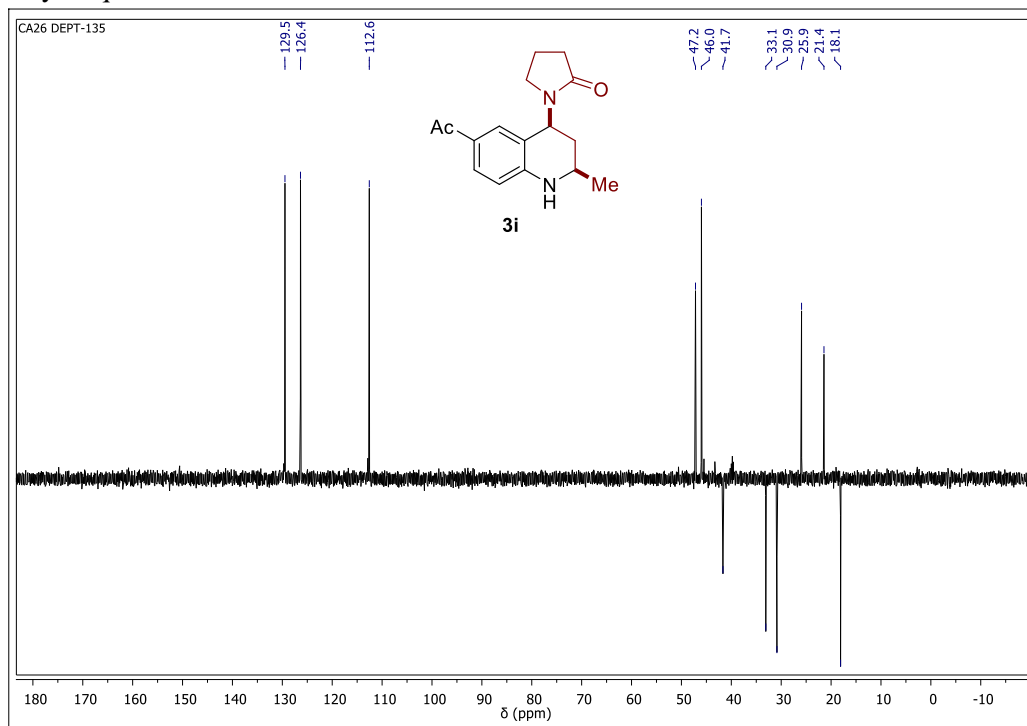

**Figure ESI 43.** NOESY spectrum of *cis*-6-Acetyl-4-(pyrrolidinyl-2-one)-2-methyl-1,2,3,4-tetrahydroquinoline **3i**.

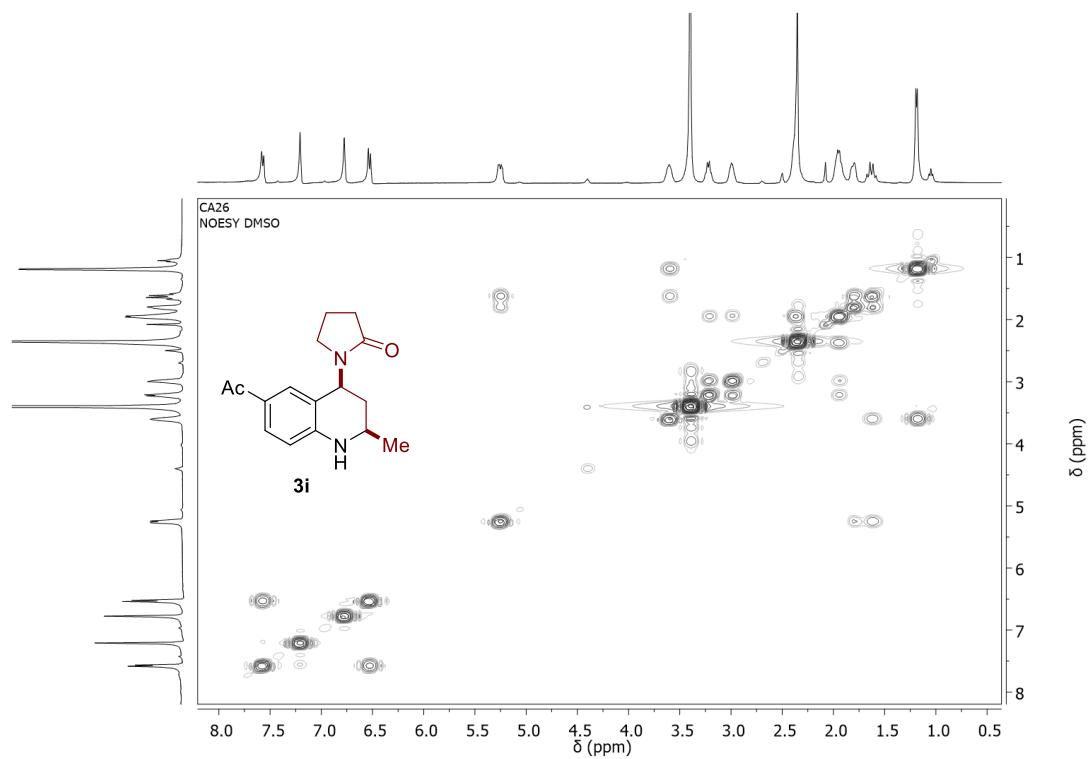

**Figure ESI 44.** COSY spectrum of *cis*-6-Acetyl-4-(pyrrolidinyl-2-one)-2-methyl-1,2,3,4-tetrahydroquinoline **3i**.

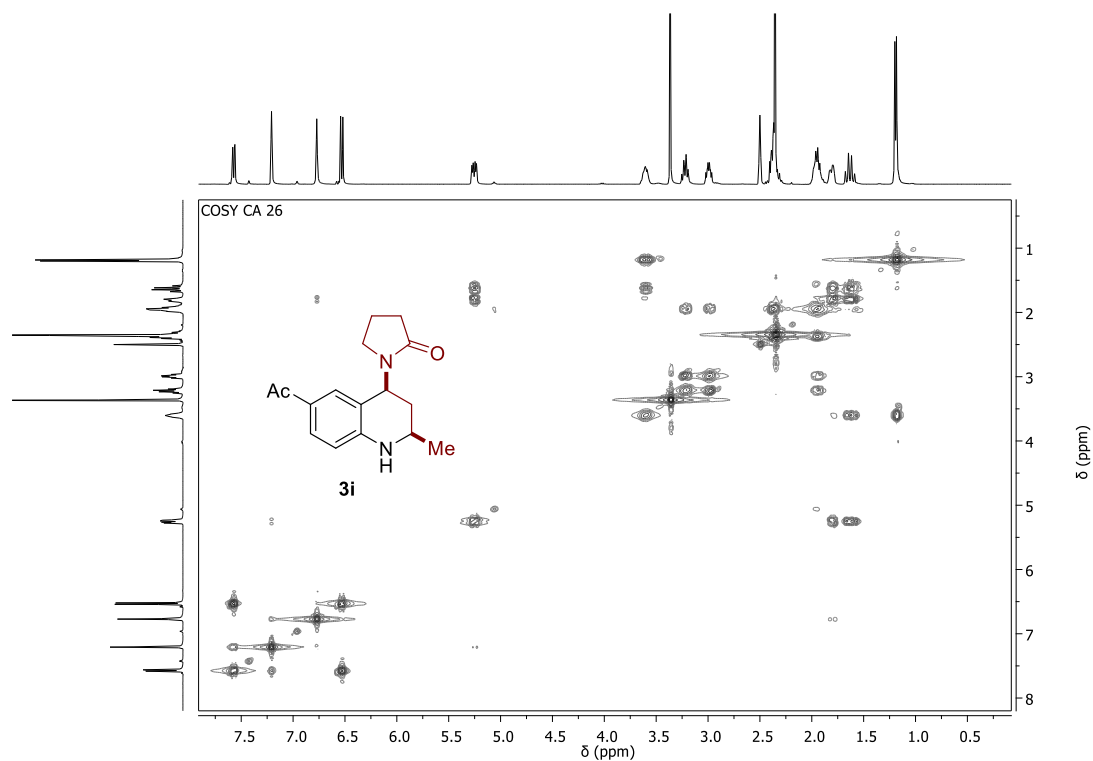

**Figure ESI 45.** HSQC spectrum of *cis*-6-Acetyl-4-(pyrrolidinyl-2-one)-2-methyl-1,2,3,4-tetrahydroquinoline **3i**.

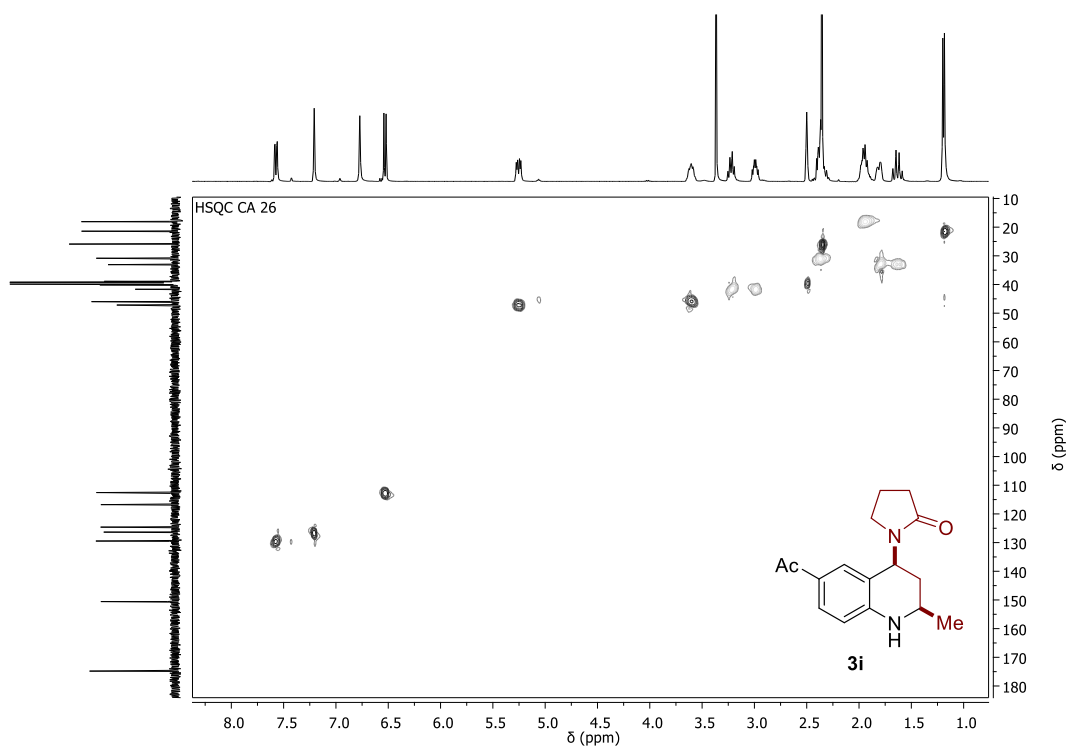



**Figure ESI 46.** HMBC spectrum of *cis*-6-Acetyl-4-(pyrrolidinyl-2-one)-2-methyl-1,2,3,4-tetrahydroquinoline **3i**.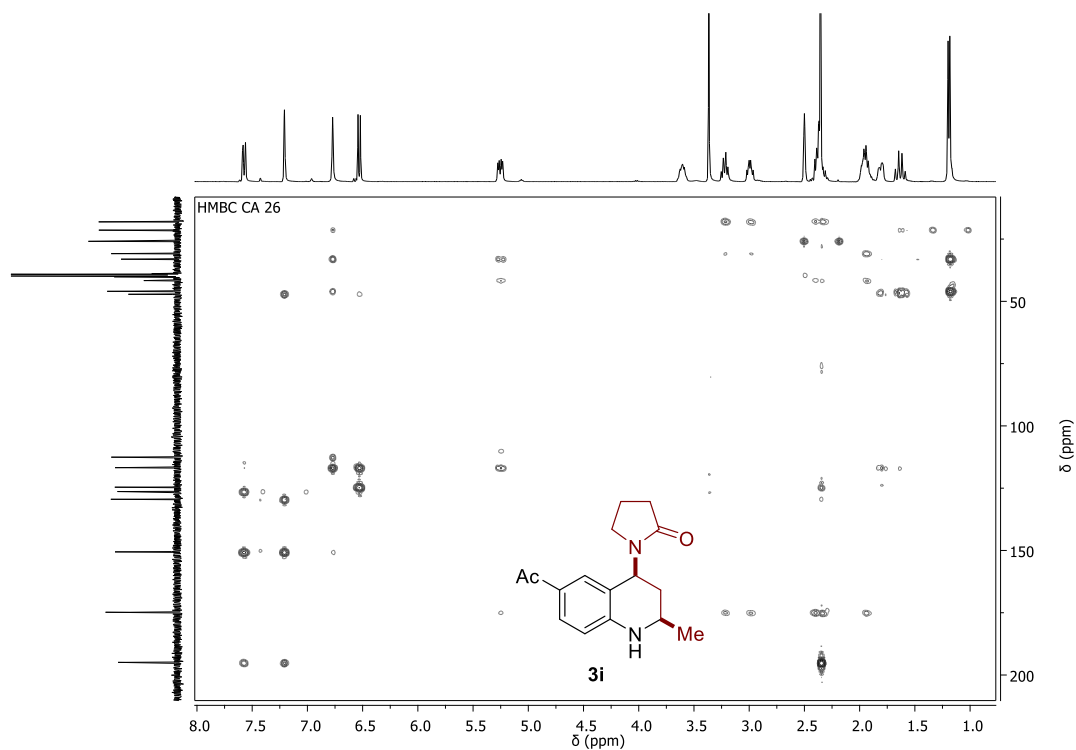**Figure ESI 47.** <sup>1</sup>H-NMR spectrum of *cis*-4-(Pyrrolidinyl-2-one)-2-methyl-1,2,3,4-tetrahydroquinoline **3j**.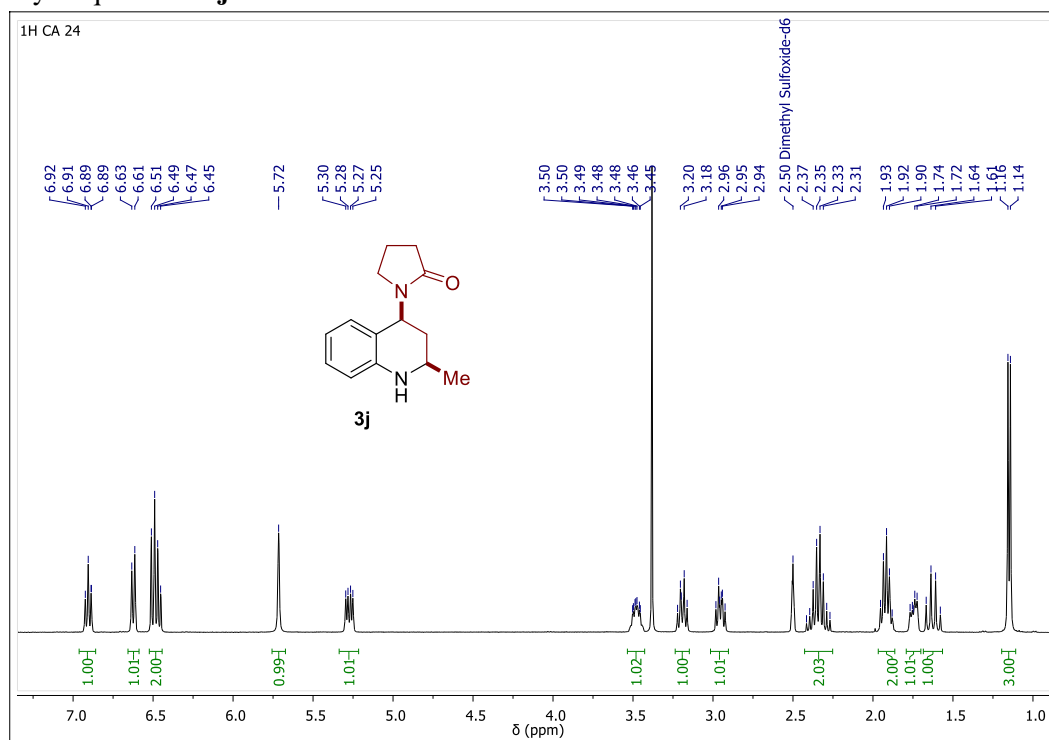

**Figure ESI 48.** <sup>13</sup>C-NMR spectrum of *cis*-4-(Pyrrolidinyl-2-one)-2-methyl-1,2,3,4-tetrahydroquinoline **3j**.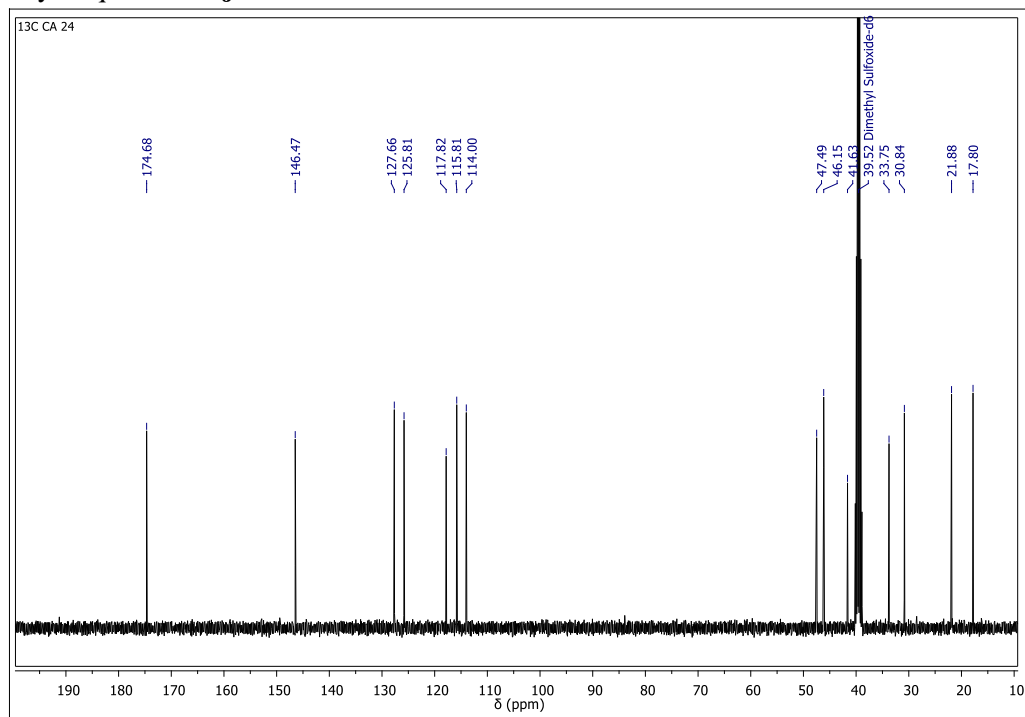**Figure ESI 49.** DEPT-135 spectrum of *cis*-4-(Pyrrolidinyl-2-one)-2-methyl-1,2,3,4-tetrahydroquinoline **3j**.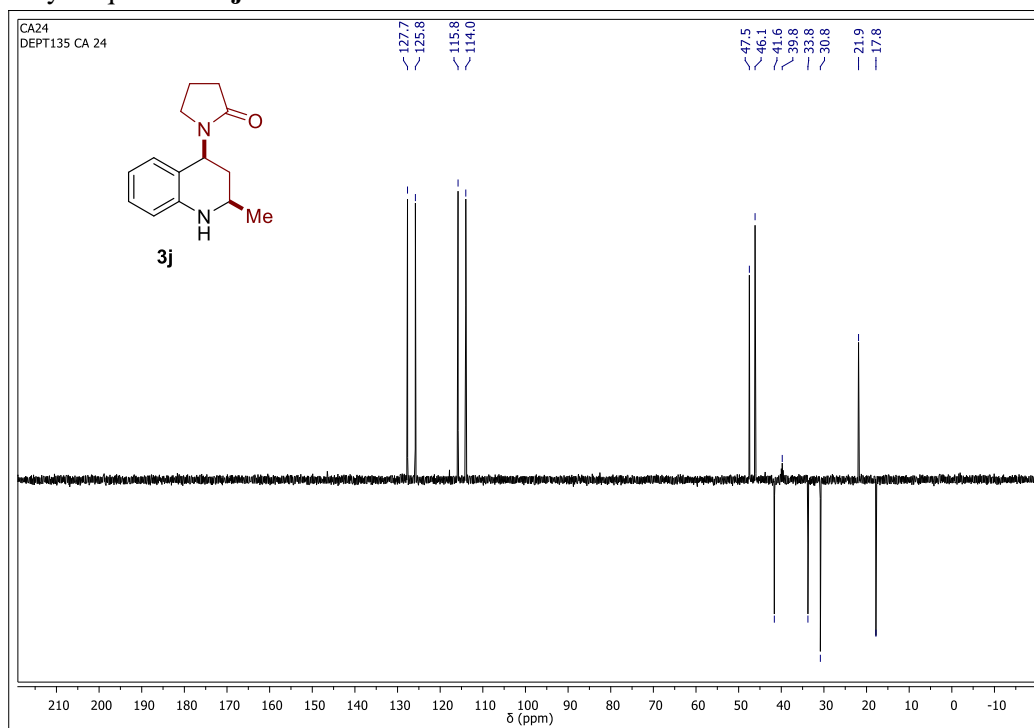

**Figure ESI 50.** COSY spectrum of *cis*-4-(Pyrrolidinyl-2-one)-2-methyl-1,2,3,4-tetrahydroquinoline **3j**.

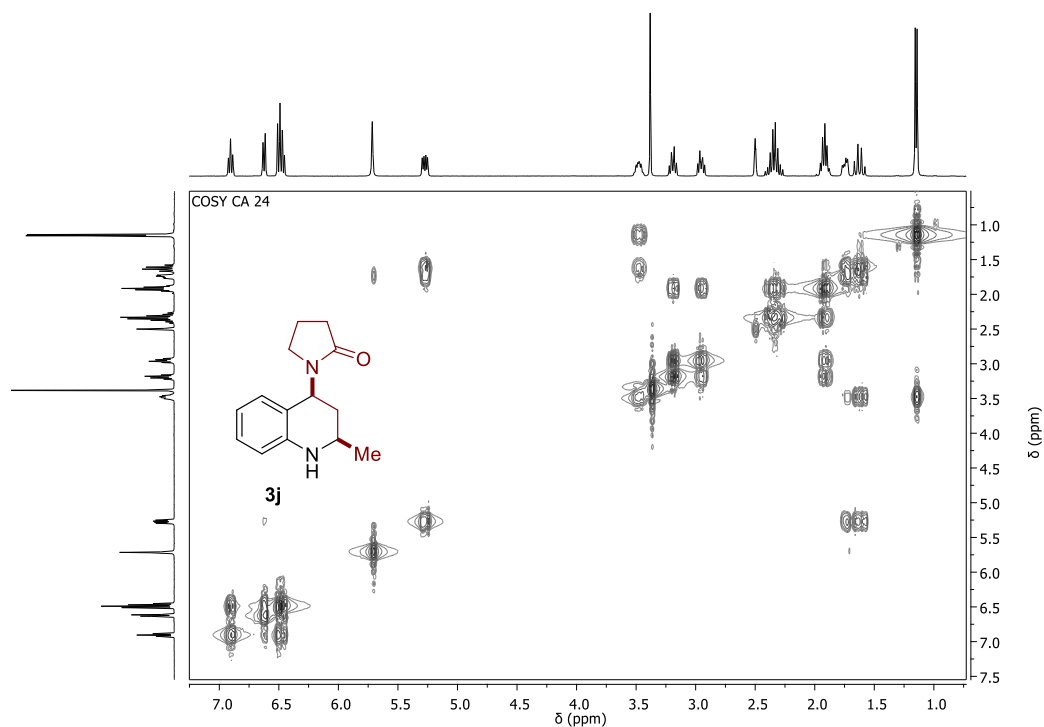

**Figure ESI 51.** HSQC spectrum of *cis*-4-(Pyrrolidinyl-2-one)-2-methyl-1,2,3,4-tetrahydroquinoline **3j**.

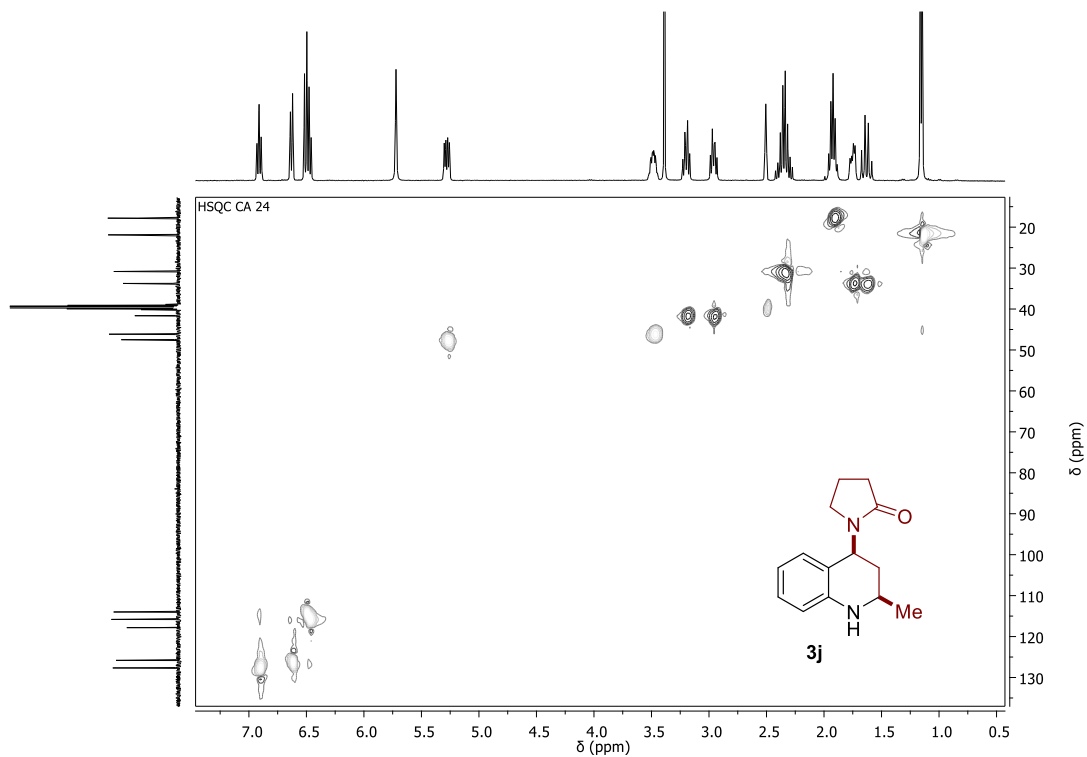

**Figure ESI 52.** HMBC spectrum of *cis*-4-(Pyrrolidinyl-2-one)-2-methyl-1,2,3,4-tetrahydroquinoline **3j**.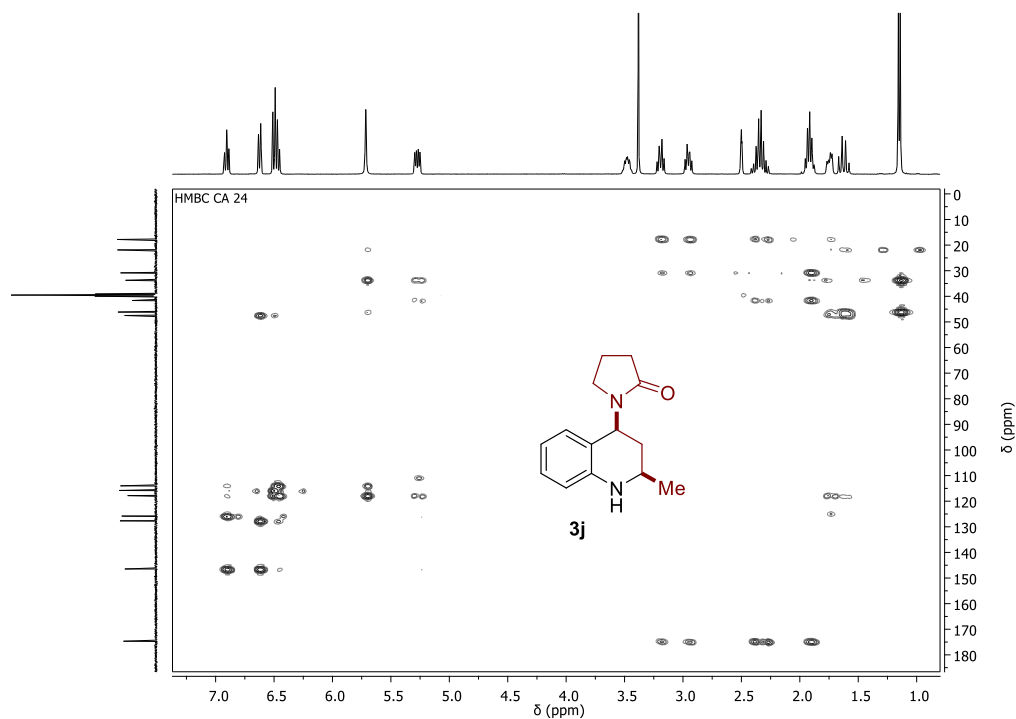**Figure ESI 53.** <sup>1</sup>H-NMR spectrum of *cis*-6-Methoxy-4-(pyrrolidinyl-2-one)-2-methyl-1,2,3,4-tetrahydroquinoline **3k**.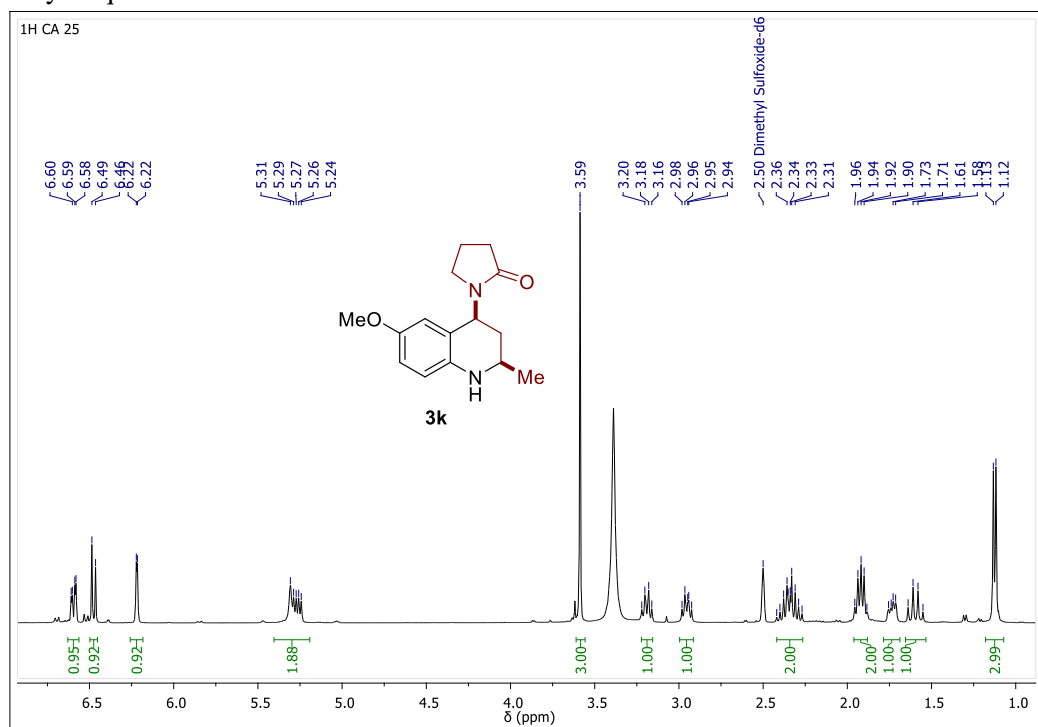

**Figure ESI 54.** <sup>13</sup>C-NMR spectrum of *cis*-6-Methoxy-4-(pyrrolidinyl-2-one)-2-methyl-1,2,3,4-tetrahydroquinoline **3k**.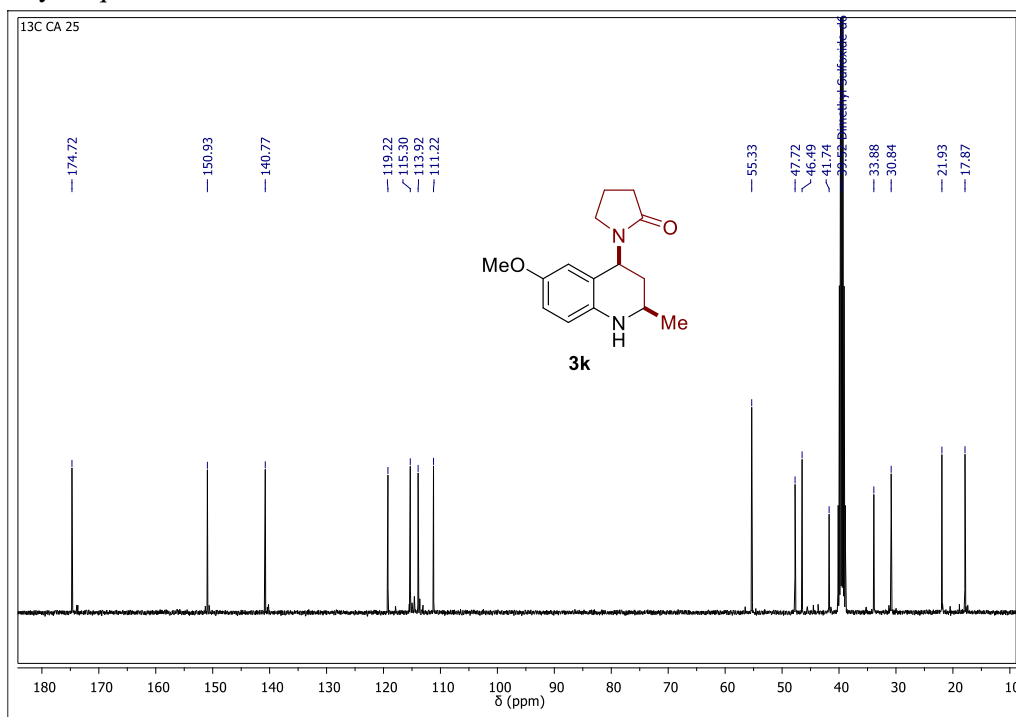**Figure ESI 55.** DEPT-135 spectrum of *cis*-6-Methoxy-4-(pyrrolidinyl-2-one)-2-methyl-1,2,3,4-tetrahydroquinoline **3k**.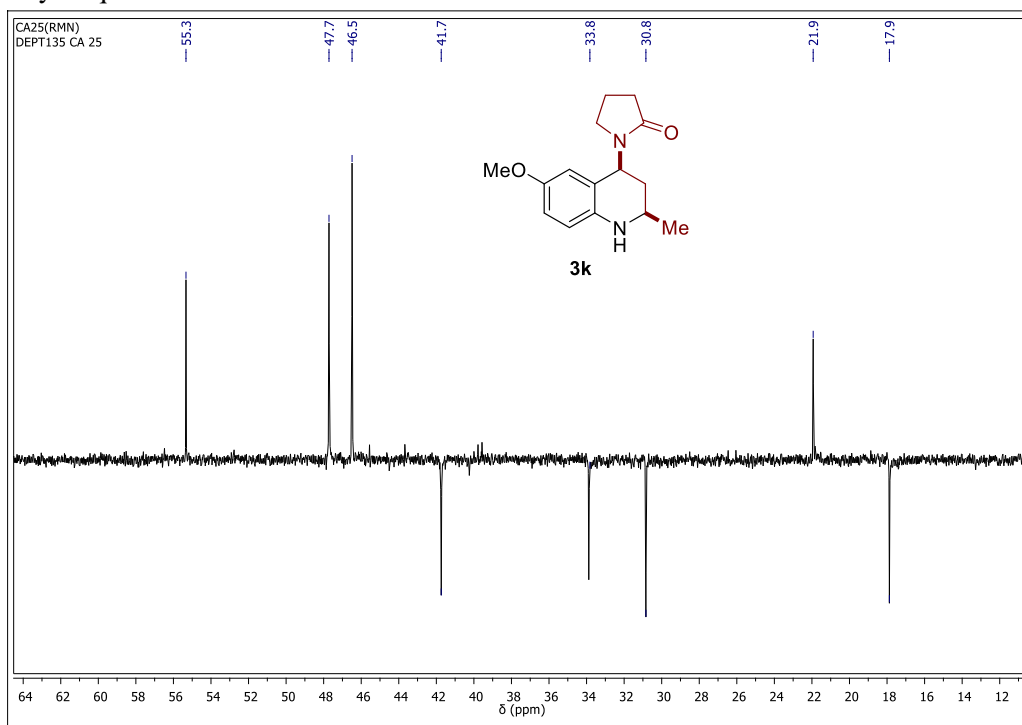

**Figure ESI 56.** COSY spectrum of *cis*-6-Methoxy-4-(pyrrolidinyl-2-one)-2-methyl-1,2,3,4-tetrahydroquinoline **3k**.

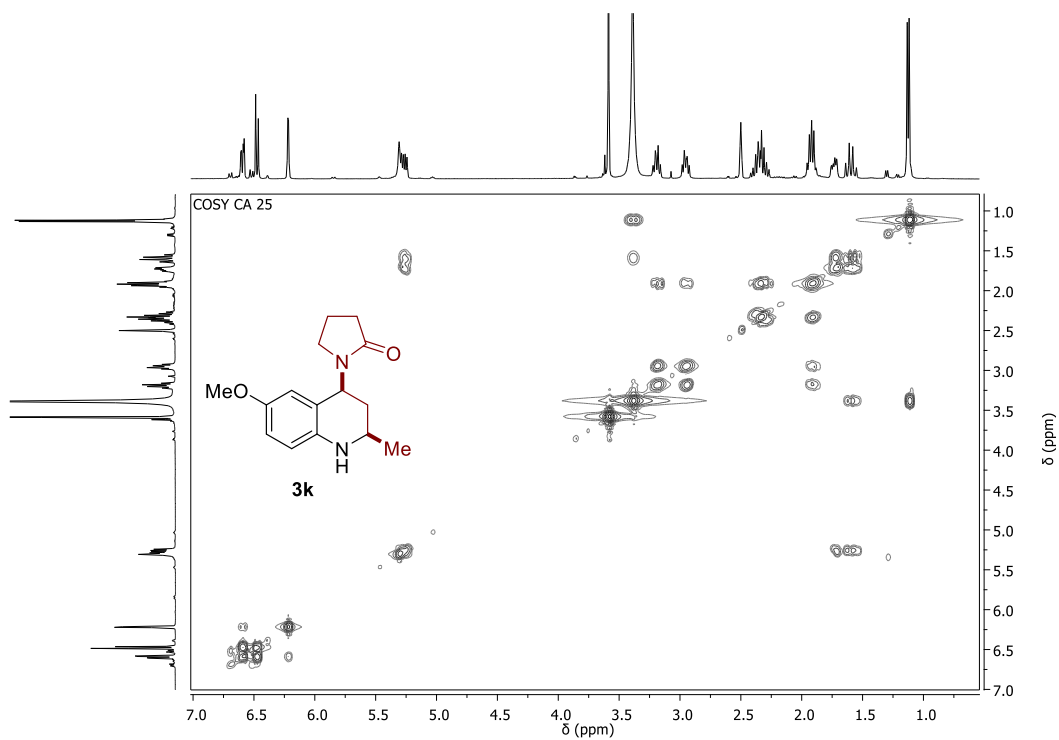

**Figure ESI 57.** HSQC spectrum of *cis*-6-Methoxy-4-(pyrrolidinyl-2-one)-2-methyl-1,2,3,4-tetrahydroquinoline **3k**.

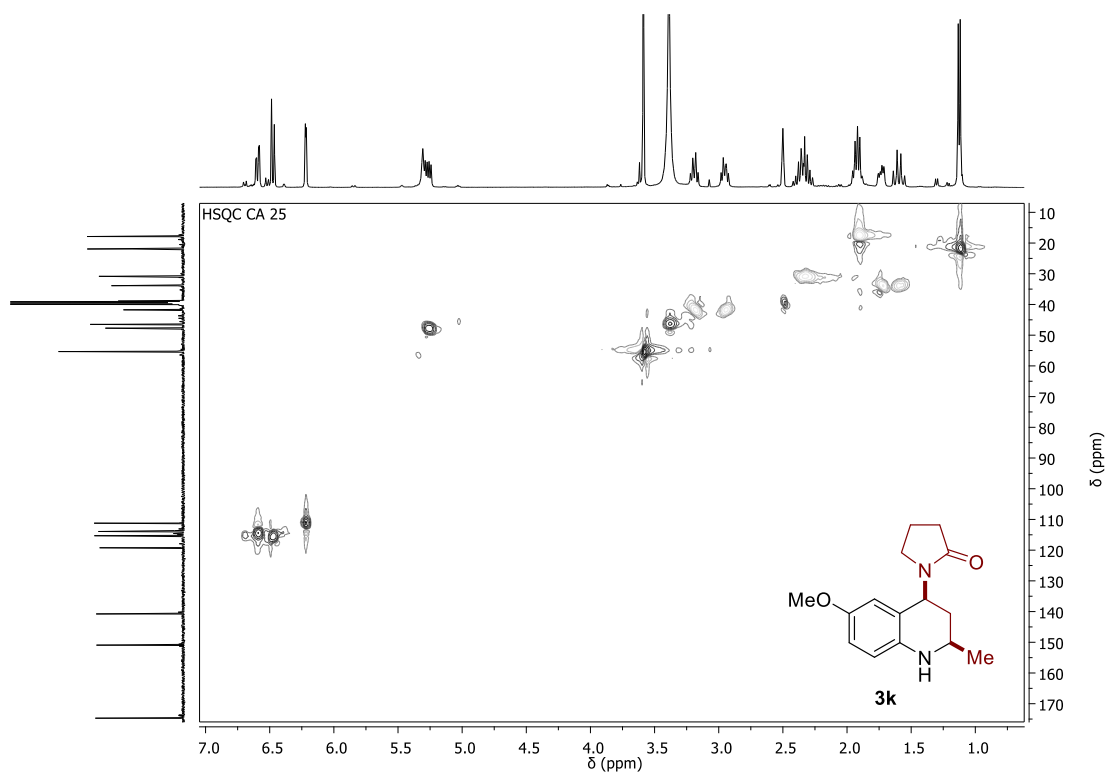

**Figure ESI 58.** HMBC spectrum of *cis*-6-Methoxy-4-(pyrrolidinyl-2-one)-2-methyl-1,2,3,4-tetrahydroquinoline **3k**.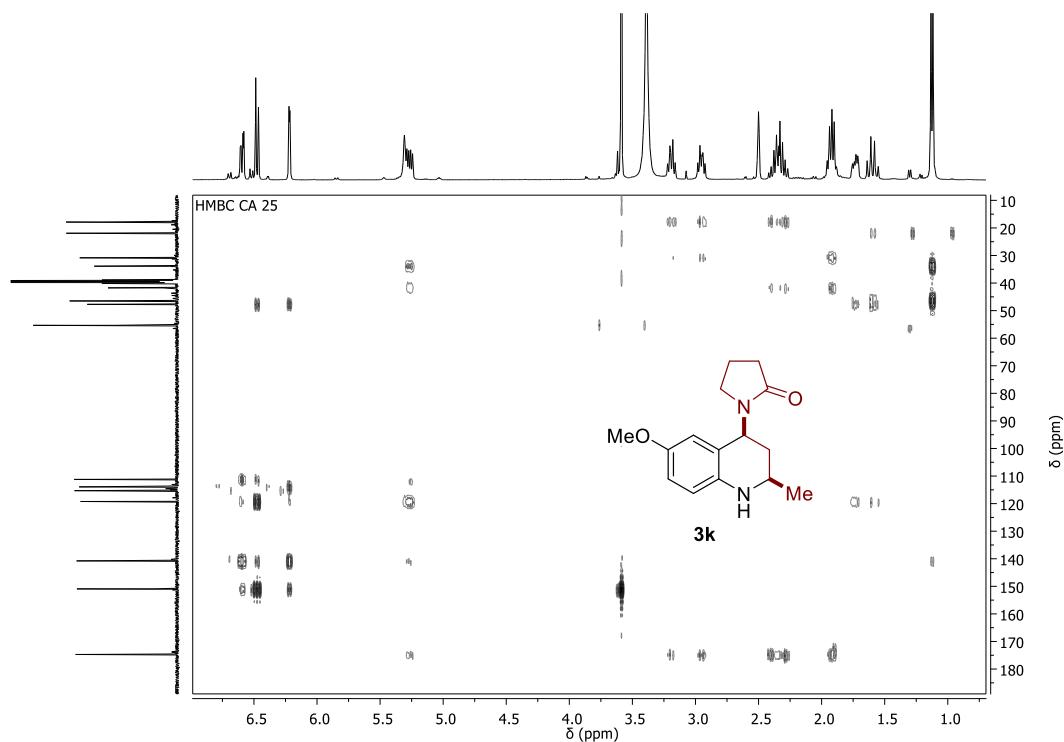**Figure ESI 59.** <sup>1</sup>H-NMR spectrum of *cis*-4-(Pyrrolidinyl-2-one)-2-methyl-1,2,3,4-tetrahydroquinoline **3l**.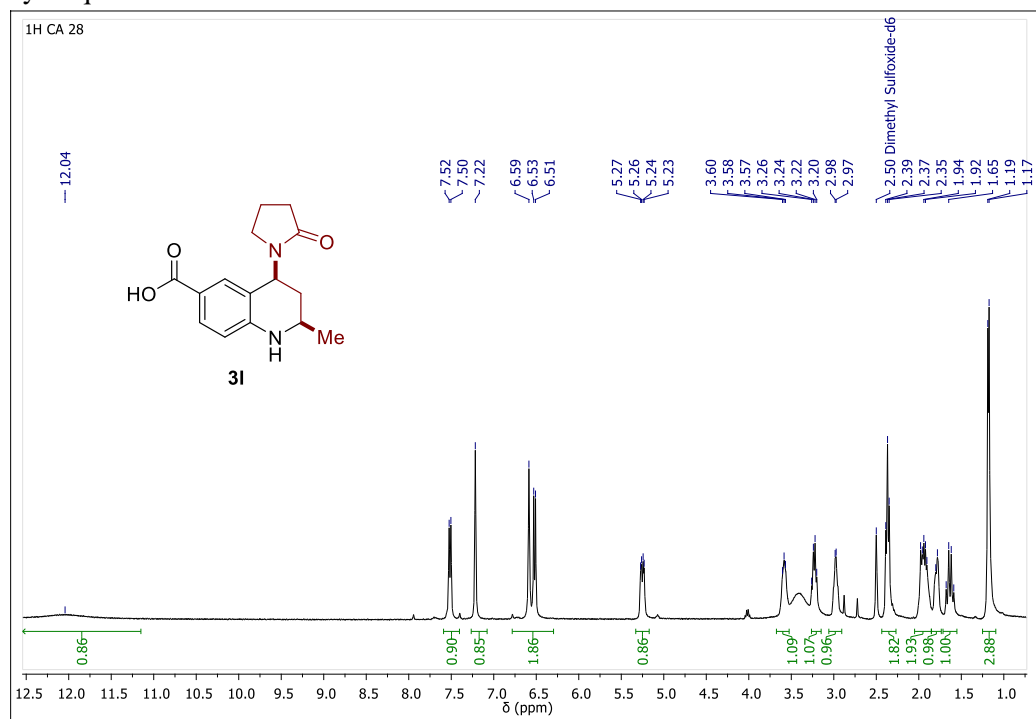

**Figure ESI 60.** <sup>13</sup>C-NMR spectrum of *cis*-4-(Pyrrolidinyl-2-one)-2-methyl-1,2,3,4-tetrahydroquinoline **31**.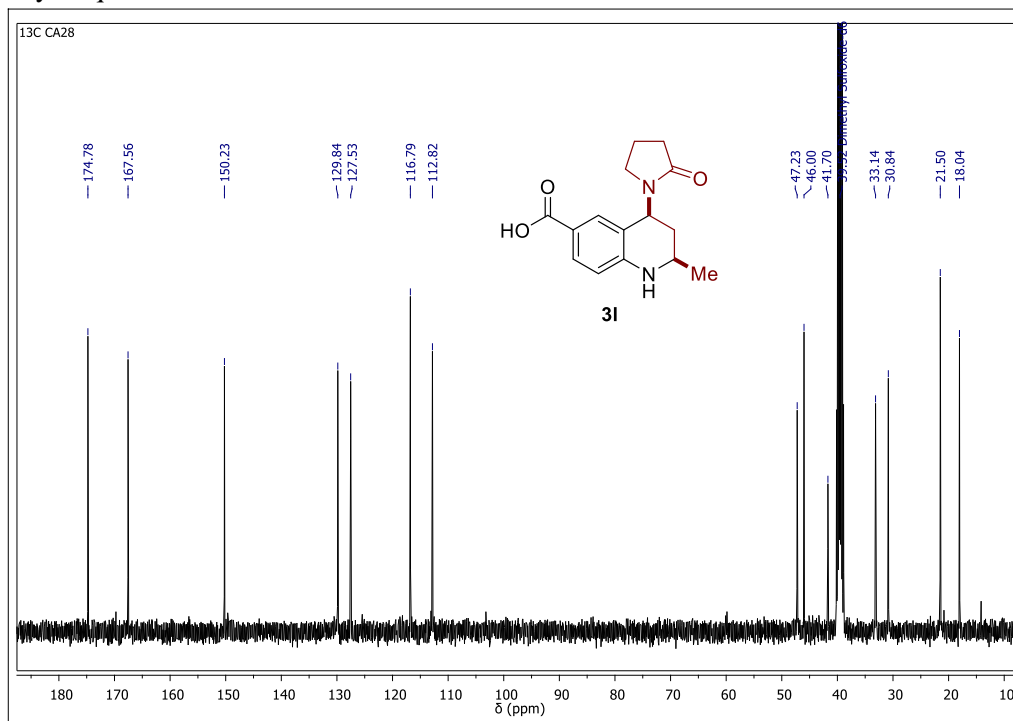**Figure ESI 61.** DEPT-135 spectrum of *cis*-4-(Pyrrolidinyl-2-one)-2-methyl-1,2,3,4-tetrahydroquinoline **31**.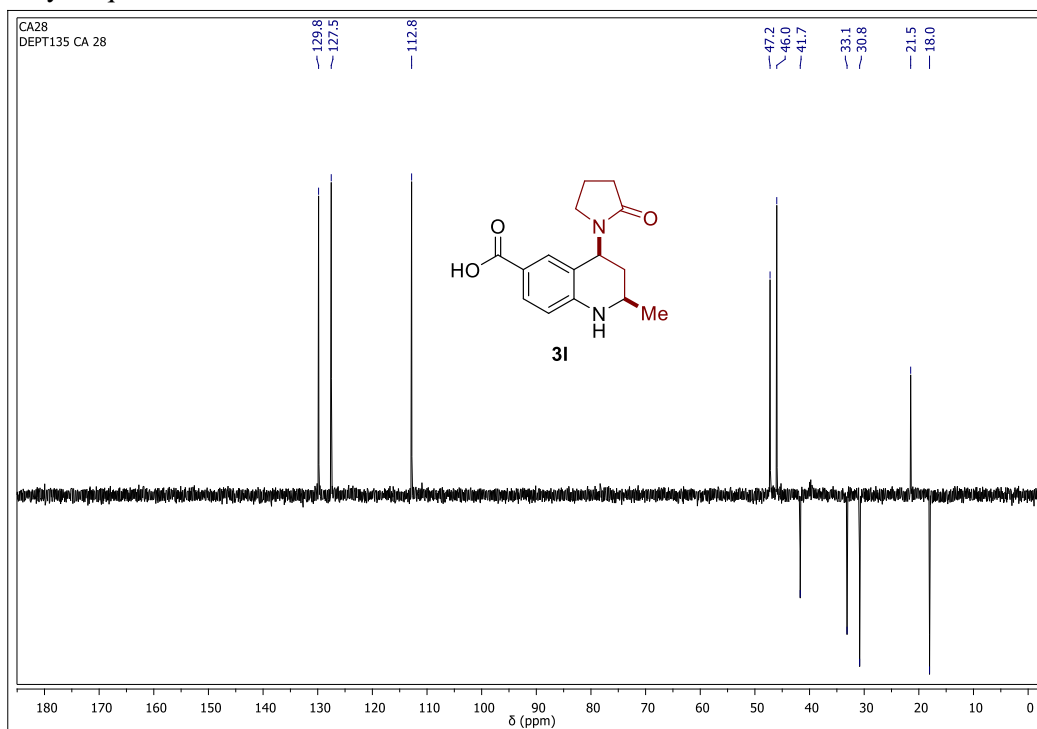



**Figure ESI 62.** COSY spectrum of *cis*-4-(Pyrrolidinyl-2-one)-2-methyl-1,2,3,4-tetrahydroquinoline **3I**.

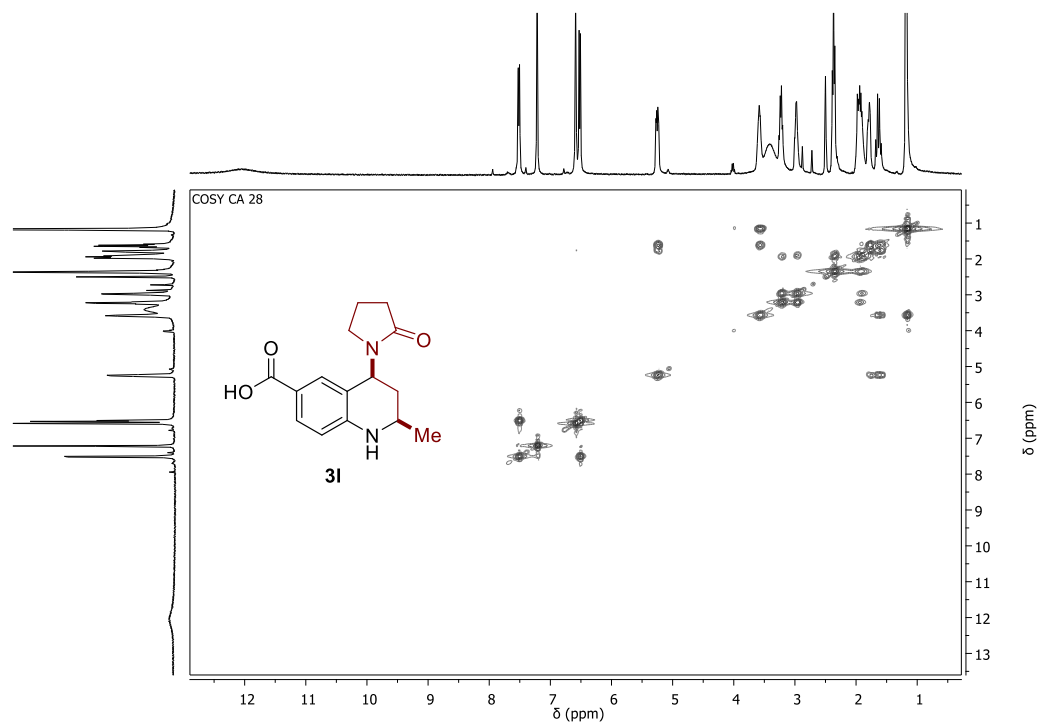

**Figure ESI 63.** HSQC spectrum of *cis*-4-(Pyrrolidinyl-2-one)-2-methyl-1,2,3,4-tetrahydroquinoline **3I**.

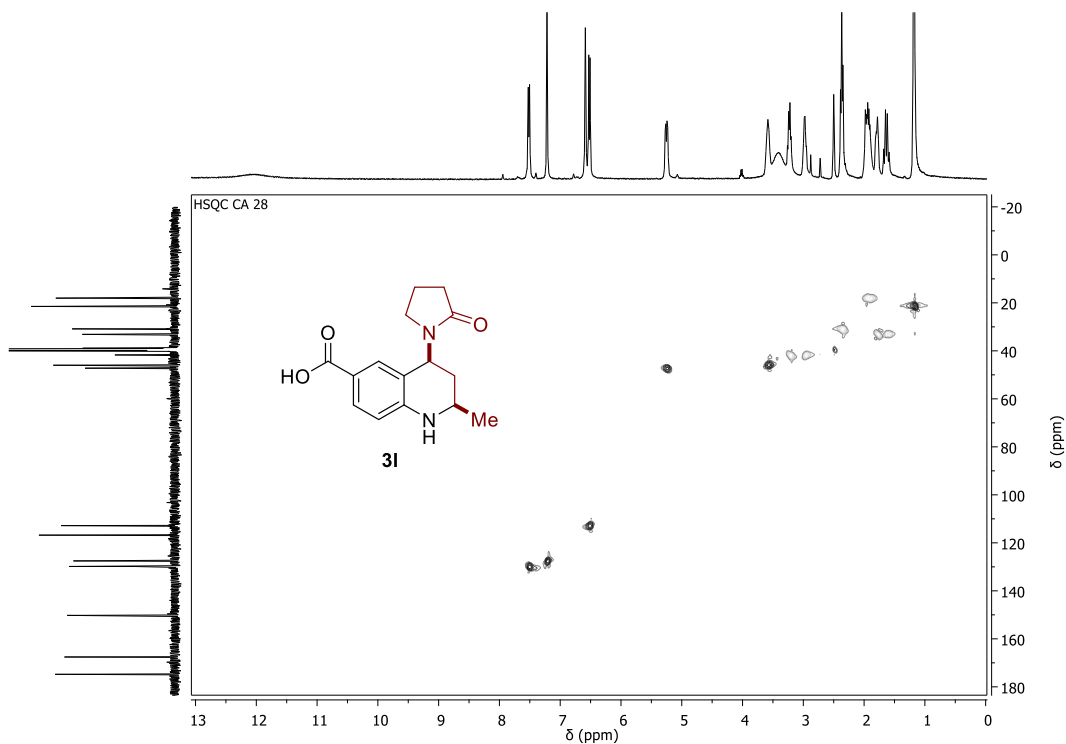

**Figure ESI 64.** HMBC spectrum of *cis*-4-(Pyrrolidinyl-2-one)-2-methyl-1,2,3,4-tetrahydroquinoline **3l**.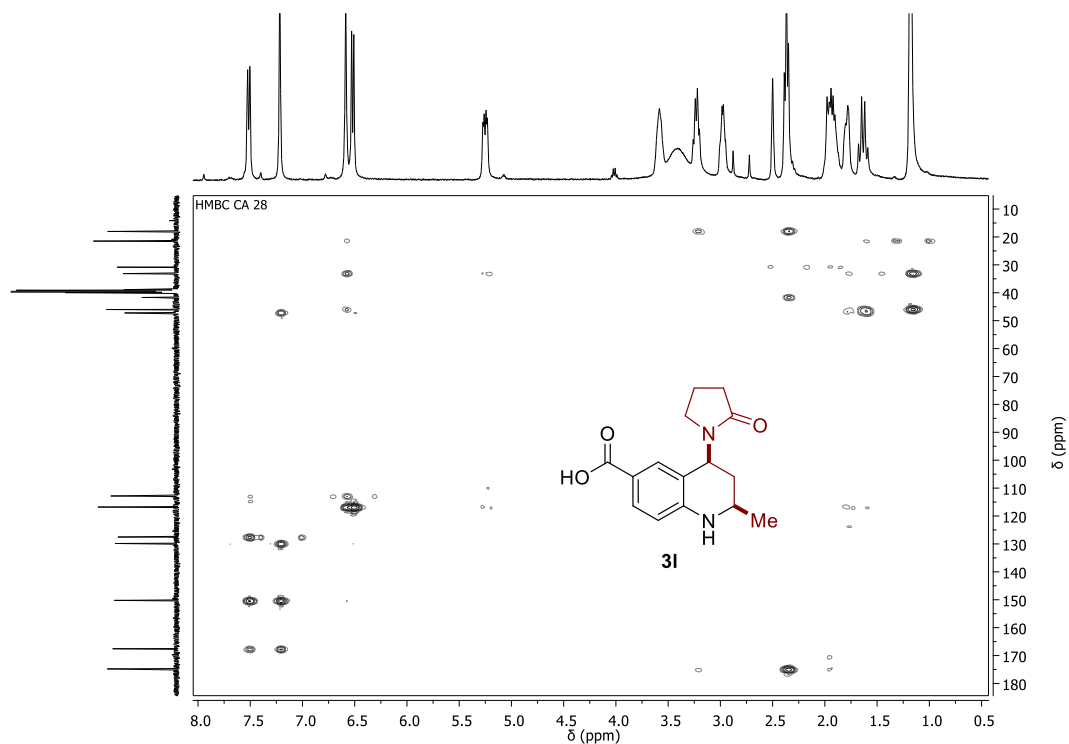

#### 4. Photographic records of the phenotypic changes during the development of the zebrafish embryo treated with compounds 3a-l after 96 hpf.

| Compound                                                                                                  | Concentration in $\mu\text{M}$ (96 hpf) |  |           |  |
|-----------------------------------------------------------------------------------------------------------|-----------------------------------------|--|-----------|--|
|                                                                                                           | Control                                 |  | 75        |  |
| <br><b>3a</b>                                                                                             |                                         |  | <b>75</b> |  |
|                                                                                                           | <b>150</b>                              |  | <b>50</b> |  |
| <b>LC<sub>50</sub> (<math>\mu\text{mol/L} \pm \text{SEM}</math>)</b><br><b>351.2 <math>\pm</math> 5.7</b> | <b>100</b>                              |  | <b>25</b> |  |

| Compound                                                                                | Concentration in $\mu\text{M}$ (96 hpf)                                  |                                                                                   |                                                                                   |                                                                                     |
|-----------------------------------------------------------------------------------------|--------------------------------------------------------------------------|-----------------------------------------------------------------------------------|-----------------------------------------------------------------------------------|-------------------------------------------------------------------------------------|
| 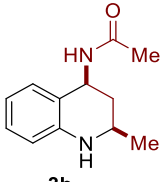<br>3b | Control                                                                  |  | 100                                                                               |  |
|                                                                                         | LC <sub>50</sub> ( $\mu\text{mol/L} \pm \text{SEM}$ )<br>223.8 $\pm$ 7.1 | 150                                                                               |  | 50                                                                                  |

| Compound                                                                                 | Concentration in $\mu\text{M}$ (96 hpf)                                  |                                                                                    |                                                                                     |                                                                                      |
|------------------------------------------------------------------------------------------|--------------------------------------------------------------------------|------------------------------------------------------------------------------------|-------------------------------------------------------------------------------------|--------------------------------------------------------------------------------------|
| 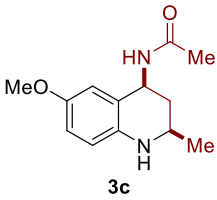<br>3c | Control                                                                  |  | 75                                                                                  |  |
|                                                                                          | LC <sub>50</sub> ( $\mu\text{mol/L} \pm \text{SEM}$ )<br>400.4 $\pm$ 7.2 | 200                                                                                |  | 50                                                                                   |

| Compound                                                                                                  | Concentration in $\mu\text{M}$ (96 hpf) |                                                                                   |     |                                                                                     |
|-----------------------------------------------------------------------------------------------------------|-----------------------------------------|-----------------------------------------------------------------------------------|-----|-------------------------------------------------------------------------------------|
| 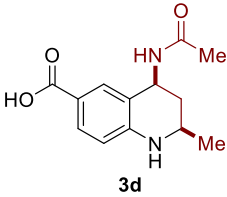<br><b>3d</b>            | Control                                 |  | 200 |  |
|                                                                                                           | 400                                     |  | 125 |  |
| <b>LC<sub>50</sub> (<math>\mu\text{mol/L} \pm \text{SEM}</math>)</b><br><b>429.7 <math>\pm</math> 0.3</b> | 250                                     |  | 62  |  |

| Compound                                                                                                  | Concentration in $\mu\text{M}$ (96 hpf) |                                                                                    |     |                                                                                       |
|-----------------------------------------------------------------------------------------------------------|-----------------------------------------|------------------------------------------------------------------------------------|-----|---------------------------------------------------------------------------------------|
| 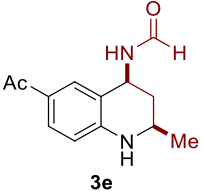<br><b>3e</b>            | Control                                 |   | 100 |    |
|                                                                                                           | 125                                     |  | 31  |  |
| <b>LC<sub>50</sub> (<math>\mu\text{mol/L} \pm \text{SEM}</math>)</b><br><b>429.3 <math>\pm</math> 0.4</b> |                                         |                                                                                    |     |                                                                                       |

| Compound                                                                                                  | Concentration in $\mu\text{M}$ (96 hpf) |                                                                                     |     |                                                                                       |
|-----------------------------------------------------------------------------------------------------------|-----------------------------------------|-------------------------------------------------------------------------------------|-----|---------------------------------------------------------------------------------------|
| 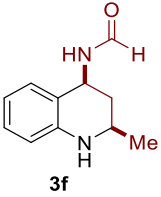<br><b>3f</b>          | Control                                 |  | 100 |  |
|                                                                                                           | 150                                     |  | 75  |  |
| <b>LC<sub>50</sub> (<math>\mu\text{mol/L} \pm \text{SEM}</math>)</b><br><b>216.0 <math>\pm</math> 7.1</b> |                                         |                                                                                     |     |                                                                                       |

| Compound                                                                                | Concentration in $\mu\text{M}$ (96 hpf)                                  |                                                                                   |                                                                                   |                                                                                     |
|-----------------------------------------------------------------------------------------|--------------------------------------------------------------------------|-----------------------------------------------------------------------------------|-----------------------------------------------------------------------------------|-------------------------------------------------------------------------------------|
| 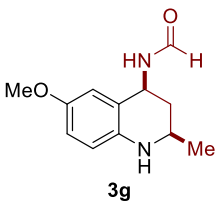<br>3g | Control                                                                  |  | 200                                                                               |  |
|                                                                                         | LC <sub>50</sub> ( $\mu\text{mol/L} \pm \text{SEM}$ )<br>435.9 $\pm$ 3.7 | 250                                                                               |  | 125                                                                                 |

| Compound                                                                                 | Concentration in $\mu\text{M}$ (96 hpf)                                   |                                                                                     |                                                                                     |                                                                                       |
|------------------------------------------------------------------------------------------|---------------------------------------------------------------------------|-------------------------------------------------------------------------------------|-------------------------------------------------------------------------------------|---------------------------------------------------------------------------------------|
| 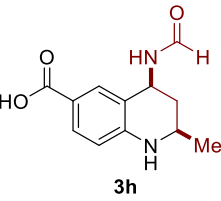<br>3h | Control                                                                   |  | 200                                                                                 |  |
|                                                                                          | LC <sub>50</sub> ( $\mu\text{mol/L} \pm \text{SEM}$ )<br>449.2 $\pm$ 10.2 | 250                                                                                 |  | 125                                                                                   |

| Compound                                                                                  | Concentration in $\mu\text{M}$ (96 hpf)                                  |                                                                                     |                                                                                     |                                                                                       |
|-------------------------------------------------------------------------------------------|--------------------------------------------------------------------------|-------------------------------------------------------------------------------------|-------------------------------------------------------------------------------------|---------------------------------------------------------------------------------------|
| 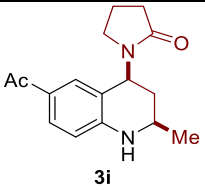<br>3i | Control                                                                  |  | 75                                                                                  |  |
|                                                                                           | LC <sub>50</sub> ( $\mu\text{mol/L} \pm \text{SEM}$ )<br>426.3 $\pm$ 7.0 | 100                                                                                 |  | 50                                                                                    |

| Compound                                                                                                   | Concentration in $\mu\text{M}$ (96 hpf) |                                                                                   |     |                                                                                     |
|------------------------------------------------------------------------------------------------------------|-----------------------------------------|-----------------------------------------------------------------------------------|-----|-------------------------------------------------------------------------------------|
| 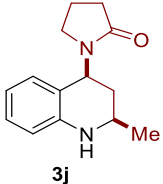<br>3j                    | Control                                 |  | 100 |  |
| <b>LC<sub>50</sub> (<math>\mu\text{mol/L} \pm \text{SEM}</math>)</b><br><b>330.7 <math>\pm</math> 13.7</b> | 200                                     |  | 75  |  |

| Compound                                                                                                 | Concentration in $\mu\text{M}$ (96 hpf) |                                                                                    |    |                                                                                       |
|----------------------------------------------------------------------------------------------------------|-----------------------------------------|------------------------------------------------------------------------------------|----|---------------------------------------------------------------------------------------|
| 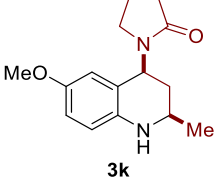<br>3k                  | Control                                 |   | 18 |    |
| <b>LC<sub>50</sub> (<math>\mu\text{mol/L} \pm \text{SEM}</math>)</b><br><b>94.9 <math>\pm</math> 3.7</b> | 25                                      |  | 10 |  |

| Compound                                                                                                  | Concentration in $\mu\text{M}$ (96 hpf) |                                                                                     |     |                                                                                       |
|-----------------------------------------------------------------------------------------------------------|-----------------------------------------|-------------------------------------------------------------------------------------|-----|---------------------------------------------------------------------------------------|
| 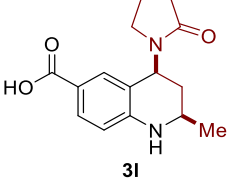<br>3l                 | Control                                 |  | 150 |  |
| <b>LC<sub>50</sub> (<math>\mu\text{mol/L} \pm \text{SEM}</math>)</b><br><b>358.4 <math>\pm</math> 9.0</b> | 200                                     |  | 100 |  |
